# Supplementary material for: Comparative transcriptome analysis of whiteflies raised on cotton leaf curl Multan virus-infected cotton plants
Source: Front Vet Sci. 2024 Aug 28;11:1417590. doi: 10.3389/fvets.2024.1417590 (PMC11389618; doi:10.3389/fvets.2024.1417590)
Supplement: Supplementary file 4 [file Table_4.XLSX]

## Sheet: VA vs AA
tf_id	tf_Family	gene_id	UP_DOWN_REGULATION(AIvsAU)	log2FC(AIvsAU)	q value(AIvsAU)	Gene Length	NR GI	NR ID	NR Score	NR Evalue	NR Description	NT GI	NT ID	NT Score	NT Evalue	NT Description	KO ID	KO Name	KO Description	Http Link	Swissprot ID	Swissprot Score	Swissprot Evalue	Swissprot Description	PFAM ID	PFAM description	Gene Ontology Biological Pathway	BP Description	Gene Ontology Molecular Function	MF Description	Gene Ontology Cellular Component	CC Description	KOG ID	KOG Description
Cluster-35353.33963	HMG	Cluster-35353.33963	DOWN	-1.9856	4.95e-53	5286	9766685	XP_018912314.1	7196	0	PREDICTED: uncharacterized protein LOC109040739 isoform X2 [Bemisia tabaci]	XM_019056770.1	XM_019056770	4751	0	PREDICTED: Bemisia tabaci protein capicua homolog (LOC109040739), transcript variant X5, mRNA	--	--	--	--	Q96RK0	439	1.8e-41	Protein capicua homolog OS=Homo sapiens GN=CIC PE=1 SV=2	PF12409//PF00214	P5-type ATPase cation transporter//Calcitonin / CGRP / IAPP family	GO:0006812//GO:0007165	cation transport//signal transduction	GO:0016887//GO:0005179	ATPase activity//hormone activity	GO:0005576//GO:0016021	extracellular region//integral component of membrane	KOG2746	HMG-box transcription factor Capicua and related proteins
Cluster-35353.36297	NF-YC	Cluster-35353.36297	DOWN	-1.0241	2.79e-16	5149	9726394	XP_018897259.1	1336	4.5e-144	PREDICTED: nuclear transcription factor Y subunit gamma [Bemisia tabaci]	XM_019041714.1	XM_019041714	3133	0	PREDICTED: Bemisia tabaci nuclear transcription factor Y subunit gamma (LOC109030647), mRNA	K08066	NFYC	nuclear transcription factor Y, gamma	http://www.genome.jp/dbget-bin/www_bget?ko:K08066	Q5RA23	550	2.3e-54	Nuclear transcription factor Y subunit gamma OS=Pongo abelii GN=NFYC PE=2 SV=1	PF09415//PF00125	CENP-S associating Centromere protein X//Core histone H2A/H2B/H3/H4	GO:0006281//GO:0051382	DNA repair//kinetochore assembly	GO:0003677	DNA binding	--	--	KOG3275	Zinc-binding protein of the histidine triad (HIT) family
Cluster-35353.34842	ARID	Cluster-35353.34842	UP	2.1984	0.0010213	1912	9764360	XP_018909715.1	1535	1.4e-167	PREDICTED: protein dead ringer homolog isoform X1 [Bemisia tabaci]	XM_019054170.1	XM_019054170	1757	0	PREDICTED: Bemisia tabaci protein dead ringer homolog (LOC109038905), transcript variant X1, mRNA	--	--	--	--	Q24573	669	1.4e-68	Protein dead ringer OS=Drosophila melanogaster GN=retn PE=1 SV=2	PF01388//PF00514	ARID/BRIGHT DNA binding domain//Armadillo/beta-catenin-like repeat	--	--	GO:0003677//GO:0005515	DNA binding//protein binding	--	--	KOG2744	DNA-binding proteins Bright/BRCAA1/RBP1 and related proteins containing BRIGHT domain
Cluster-35353.35333	ZBTB	Cluster-35353.35333	DOWN	-1.0325	3e-13	6285	9722316	XP_018903094.1	5733	0	PREDICTED: rabankyrin-5 [Bemisia tabaci]	XM_019047549.1	XM_019047549	4483	0	PREDICTED: Bemisia tabaci rabankyrin-5 (LOC109034421), mRNA	--	--	--	--	Q810B6	2873	0	Rabankyrin-5 OS=Mus musculus GN=Ankfy1 PE=2 SV=2	PF13606//PF11435//PF03842//PF00023//PF00651//PF01363	Ankyrin repeat//RNA binding protein She2p//Silicon transporter//Ankyrin repeat//BTB/POZ domain//FYVE zinc finger	GO:0015708	silicate transport	GO:0005515//GO:0003723//GO:0046872	protein binding//RNA binding//metal ion binding	--	--	KOG4177	Ankyrin
Cluster-35353.38362	bHLH	Cluster-35353.38362	UP	1.102	9.94e-14	3116	9722005	XP_018899726.1	660	6.6e-66	PREDICTED: longitudinals lacking protein-like [Bemisia tabaci]	XM_019044181.1	XM_019044181	2906	0	PREDICTED: Bemisia tabaci longitudinals lacking protein-like (LOC109032185), mRNA	--	--	--	--	Q7KRI2	594	1.1e-59	Longitudinals lacking protein-like OS=Drosophila melanogaster GN=lolal PE=1 SV=1	PF00651	BTB/POZ domain	--	--	GO:0005515	protein binding	--	--	--	--
Cluster-35353.43652	THR-like	Cluster-35353.43652	UP	1.9884	1.1e-15	2937	9724185	XP_018917519.1	3603	0	PREDICTED: protein cycle isoform X1 [Bemisia tabaci]	XM_019061974.1	XM_019061974	2586	0	PREDICTED: Bemisia tabaci protein cycle (LOC109044315), transcript variant X4, mRNA	K02296	ARNTL, BMAL1, CYC	aryl hydrocarbon receptor nuclear translocator-like protein 1	http://www.genome.jp/dbget-bin/www_bget?ko:K02296	Q6YGZ5	1255	2.3e-136	Aryl hydrocarbon receptor nuclear translocator-like protein 1 OS=Tyto alba GN=ARNTL PE=2 SV=1	PF11575//PF08447//PF00989//PF08446//PF00010	FhuF 2Fe-2S C-terminal domain//PAS fold//PAS fold//PAS fold//Helix-loop-helix DNA-binding domain	GO:0006355	regulation of transcription, DNA-templated	GO:0051537//GO:0005515//GO:0046983	2 iron, 2 sulfur cluster binding//protein binding//protein dimerization activity	--	--	KOG3561	Aryl-hydrocarbon receptor nuclear translocator
Cluster-35353.56610	C/EBP	Cluster-35353.56610	UP	1.3772	3.7e-06	2028	9765987	XP_018911542.1	1663	2.1e-182	PREDICTED: protein hairy-like [Bemisia tabaci]	XM_019055997.1	XM_019055997	1902	0	PREDICTED: Bemisia tabaci protein hairy-like (LOC109040174), mRNA	K09090	HESN	hairy and enhancer of split, invertebrate	http://www.genome.jp/dbget-bin/www_bget?ko:K09090	P14003	510	3.9e-50	Protein hairy OS=Drosophila melanogaster GN=h PE=1 SV=2	PF07527//PF00010	Hairy Orange//Helix-loop-helix DNA-binding domain	GO:0006355	regulation of transcription, DNA-templated	GO:0046983//GO:0003677	protein dimerization activity//DNA binding	--	--	--	--
Cluster-35353.22411	zf-C2H2	Cluster-35353.22411	UP	1.404	4.89e-20	4791	9721511	XP_018917124.1	3143	0	PREDICTED: ring canal kelch homolog [Bemisia tabaci]	XM_019061579.1	XM_019061579	4023	0	PREDICTED: Bemisia tabaci ring canal kelch homolog (LOC109044073), mRNA	K10443	KLHL2_3	kelch-like protein 2/3	http://www.genome.jp/dbget-bin/www_bget?ko:K10443	Q70JS2	2207	1.6e-246	Ring canal kelch homolog OS=Anopheles stephensi GN=kel PE=2 SV=2	PF00651//PF06743//PF01344//PF07646	BTB/POZ domain//FAST kinase-like protein, subdomain 1//Kelch motif//Kelch motif	--	--	GO:0004672//GO:0005515	protein kinase activity//protein binding	--	--	KOG4441	Proteins containing BTB/POZ and Kelch domains, involved in regulatory/signal transduction processes
Cluster-35353.22767	THAP	Cluster-35353.22767	UP	1.4233	8.64e-22	6334	10681490	XP_021932737.1	1815	1.6e-199	probable nuclear hormone receptor HR3 isoform X2 [Zootermopsis nevadensis]	XM_019062499.1	XM_019062499	4594	0	PREDICTED: Bemisia tabaci probable nuclear hormone receptor HR3 (LOC109044674), mRNA	K14033	NR1F4	nuclear receptor subfamily 1 group F member 4	http://www.genome.jp/dbget-bin/www_bget?ko:K14033	P31396	1393	5e-152	Probable nuclear hormone receptor HR3 OS=Drosophila melanogaster GN=Hr46 PE=2 SV=1	PF00105//PF00104	Zinc finger, C4 type (two domains)//Ligand-binding domain of nuclear hormone receptor	GO:0006355//GO:0043401	regulation of transcription, DNA-templated//steroid hormone mediated signaling pathway	GO:0008270//GO:0043565//GO:0003700	zinc ion binding//sequence-specific DNA binding//transcription factor activity, sequence-specific DNA binding	GO:0005667//GO:0005634	transcription factor complex//nucleus	KOG4216	Steroid hormone nuclear receptor
Cluster-35353.52945	SF-like	Cluster-35353.52945	UP	4.4601	7.72e-11	2159	9766003	XP_018911558.1	1441	1.3e-156	PREDICTED: transcription factor HES-1-like isoform X1 [Bemisia tabaci]	XM_019056013.1	XM_019056013	1605	0	PREDICTED: Bemisia tabaci transcription factor HES-1-like (LOC109040189), transcript variant X1, mRNA	K09089	HES4	hairy and enhancer of split 4	http://www.genome.jp/dbget-bin/www_bget?ko:K09089	P35428	306	1.9e-26	Transcription factor HES-1 OS=Mus musculus GN=Hes1 PE=1 SV=1	PF00010//PF06432//PF07527	Helix-loop-helix DNA-binding domain//Phosphatidylinositol N-acetylglucosaminyltransferase//Hairy Orange	GO:0006506//GO:0006355	GPI anchor biosynthetic process//regulation of transcription, DNA-templated	GO:0003677//GO:0046983//GO:0017176	DNA binding//protein dimerization activity//phosphatidylinositol N-acetylglucosaminyltransferase activity	GO:0016021	integral component of membrane	KOG4304	Transcriptional repressors of the hairy/E(spl) family (contains HLH)
Cluster-35353.62197	CP2	Cluster-35353.62197	UP	2.3633	4.16e-05	2600	9735405	XP_018913263.1	736	8.5e-75	PREDICTED: class E basic helix-loop-helix protein 22-like [Bemisia tabaci]	XM_019057717.1	XM_019057717	989	0	PREDICTED: Bemisia tabaci class E basic helix-loop-helix protein 22-like (LOC109041373), transcript variant X1, mRNA	K09086	BHLHB4_5, BETA	class B basic helix-loop-helix protein 4/5	http://www.genome.jp/dbget-bin/www_bget?ko:K09086	Q8NFJ8	305	3e-26	Class E basic helix-loop-helix protein 22 OS=Homo sapiens GN=BHLHE22 PE=2 SV=1	PF00010	Helix-loop-helix DNA-binding domain	--	--	GO:0046983	protein dimerization activity	--	--	KOG3898	Transcription factor NeuroD and related HTH proteins
Cluster-35353.29340	MYB	Cluster-35353.29340	UP	3.1093	9.43e-07	1081	9731294	XP_018902718.1	737	2.7e-75	PREDICTED: proline-rich extensin-like protein EPR1 [Bemisia tabaci]	XM_019047173.1	XM_019047173	600	0	PREDICTED: Bemisia tabaci proline-rich extensin-like protein EPR1 (LOC109034171), mRNA	K09084	ATOH8	atonal protein 8	http://www.genome.jp/dbget-bin/www_bget?ko:K09084	Q96SQ7	257	4.6e-21	Protein atonal homolog 8 OS=Homo sapiens GN=ATOH8 PE=2 SV=2	PF01192//PF00010	RNA polymerase Rpb6//Helix-loop-helix DNA-binding domain	GO:0006144//GO:0006351//GO:0006206	purine nucleobase metabolic process//transcription, DNA-templated//pyrimidine nucleobase metabolic process	GO:0003677//GO:0046983//GO:0003899	DNA binding//protein dimerization activity//DNA-directed RNA polymerase activity	GO:0005730	nucleolus	--	--
Cluster-35353.59667	CSD	Cluster-35353.59667	UP	1.3518	4.79e-15	2825	9737538	XP_018914388.1	631	1.4e-62	PREDICTED: CCAAT..enhancer-binding protein gamma [Bemisia tabaci]	XM_019058843.1	XM_019058843	2523	0	PREDICTED: Bemisia tabaci CCAAT/enhancer-binding protein gamma (LOC109042208), mRNA	--	--	--	--	P53567	185	2.7e-12	CCAAT/enhancer-binding protein gamma OS=Homo sapiens GN=CEBPG PE=1 SV=1	PF04977//PF07716//PF00170//PF01763	Septum formation initiator//Basic region leucine zipper//bZIP transcription factor//Herpesvirus UL6 like	GO:0006323//GO:0007049//GO:0006355	DNA packaging//cell cycle//regulation of transcription, DNA-templated	GO:0003700//GO:0043565	transcription factor activity, sequence-specific DNA binding//sequence-specific DNA binding	GO:0005667	transcription factor complex	KOG3119	Basic region leucine zipper transcription factor
Cluster-35353.65216	CUT	Cluster-35353.65216	UP	3.0936	0.0010826	1847	9724257	XP_018917599.1	1254	5.2e-135	PREDICTED: CCAAT..enhancer-binding protein [Bemisia tabaci]	XM_019062054.1	XM_019062054	1716	0	PREDICTED: Bemisia tabaci CCAAT/enhancer-binding protein (LOC109044351), mRNA	K10052	CEBPN	CCAAT/enhancer binding protein (C/EBP), invertebrate	http://www.genome.jp/dbget-bin/www_bget?ko:K10052	Q05826	231	8.1e-18	CCAAT/enhancer-binding protein beta OS=Gallus gallus GN=CEBPB PE=1 SV=1	PF07716//PF00170//PF03131	Basic region leucine zipper//bZIP transcription factor//bZIP Maf transcription factor	GO:0006355	regulation of transcription, DNA-templated	GO:0003677//GO:0043565//GO:0003700	DNA binding//sequence-specific DNA binding//transcription factor activity, sequence-specific DNA binding	GO:0005667//GO:0005634	transcription factor complex//nucleus	KOG3119	Basic region leucine zipper transcription factor
Cluster-35353.34222	DM	Cluster-35353.34222	DOWN	-1.0399	7.77e-13	1828	4838359	XP_009059011.1	487	4.5e-46	hypothetical protein LOTGIDRAFT_123623 [Lottia gigantea]	XM_019048651.1	XM_019048651	1290	0	PREDICTED: Bemisia tabaci gastrula zinc finger protein XlCGF7.1-like (LOC109035140), transcript variant X2, mRNA	K09228	KRAB	KRAB domain-containing zinc finger protein	http://www.genome.jp/dbget-bin/www_bget?ko:K09228	Q6ZMW2	471	1.2e-45	Zinc finger protein 782 OS=Homo sapiens GN=ZNF782 PE=2 SV=1	PF05191//PF16622//PF00096//PF13465//PF13912	Adenylate kinase, active site lid//zinc-finger C2H2-type//Zinc finger, C2H2 type//Zinc-finger double domain//C2H2-type zinc finger	GO:0006144//GO:0046034	purine nucleobase metabolic process//ATP metabolic process	GO:0004017//GO:0046872	adenylate kinase activity//metal ion binding	--	--	--	--
Cluster-35353.29337	ETS	Cluster-35353.29337	UP	1.1798	2.5e-09	4889	9729001	XP_018900170.1	6157	0	PREDICTED: uncharacterized protein LOC109032473 isoform X3 [Bemisia tabaci]	XM_019044625.1	XM_019044625	4469	0	PREDICTED: Bemisia tabaci uncharacterized LOC109032473 (LOC109032473), transcript variant X3, mRNA	--	--	--	--	P29227	172	1.5e-10	Heterochromatin protein 1 OS=Drosophila virilis GN=HP1A PE=3 SV=1	--	--	--	--	--	--	--	--	KOG1911	Heterochromatin-associated protein HP1 and related CHROMO domain proteins
Cluster-35353.18476	TF_bZIP	Cluster-35353.18476	DOWN	-1.0442	1.44e-07	5563	1551185	EEN48299.1	440	3.8e-40	hypothetical protein BRAFLDRAFT_71028 [Branchiostoma floridae]	XM_008216656.2	XM_008216656	189	2.86e-91	PREDICTED: Nasonia vitripennis PR domain zinc finger protein 1 (LOC100123469), transcript variant X2, mRNA	--	--	--	--	Q14590	416	8.6e-39	Zinc finger protein 235 OS=Homo sapiens GN=ZNF235 PE=2 SV=3	PF00856//PF00096//PF13912//PF13465	SET domain//Zinc finger, C2H2 type//C2H2-type zinc finger//Zinc-finger double domain	--	--	GO:0046872//GO:0005515	metal ion binding//protein binding	--	--	--	--
Cluster-35353.25812	Fork head	Cluster-35353.25812	UP	1.0659	2.71e-08	11344	9724101	XP_018917426.1	2283	1.5e-253	PREDICTED: nuclear hormone receptor FTZ-F1-like [Bemisia tabaci]	XM_019061881.1	XM_019061881	5916	0	PREDICTED: Bemisia tabaci nuclear hormone receptor FTZ-F1-like (LOC109044254), mRNA	K08027	NR5A2, FTF	nuclear receptor subfamily 5 group A member 2	http://www.genome.jp/dbget-bin/www_bget?ko:K08027	P49867	891	1.5e-93	Nuclear hormone receptor FTZ-F1 OS=Bombyx mori GN=FTZ-F1 PE=1 SV=2	PF04977//PF02419//PF00104//PF01405//PF00105//PF17050	Septum formation initiator//PsbL protein//Ligand-binding domain of nuclear hormone receptor//Photosystem II reaction centre T protein//Zinc finger, C4 type (two domains)//Altered inheritance of mitochondria 5	GO:0006355//GO:0015979//GO:0007049//GO:0043401//GO:0042407	regulation of transcription, DNA-templated//photosynthesis//cell cycle//steroid hormone mediated signaling pathway//cristae formation	GO:0043565//GO:0003700//GO:0008270	sequence-specific DNA binding//transcription factor activity, sequence-specific DNA binding//zinc ion binding	GO:0016020//GO:0009539//GO:0005667//GO:0005634//GO:0044284//GO:0009523//GO:0061617	membrane//photosystem II reaction center//transcription factor complex//nucleus//mitochondrial crista junction//photosystem II//MICOS complex	KOG4218	Nuclear hormone receptor betaFTZ-F1
Cluster-35353.50457	Homeobox	Cluster-35353.50457	UP	1.1832	1.42e-05	2298	9732279	XP_018903812.1	2350	5.3e-262	PREDICTED: transcription factor CP2-like protein 1 isoform X1 [Bemisia tabaci]	XM_019048267.1	XM_019048267	2256	0	PREDICTED: Bemisia tabaci transcription factor CP2-like protein 1 (LOC109034881), transcript variant X2, mRNA	K09275	TFCP2	transcription factor CP2 and related proteins	http://www.genome.jp/dbget-bin/www_bget?ko:K09275	Q811S7	668	2.1e-68	Upstream-binding protein 1 OS=Mus musculus GN=Ubp1 PE=1 SV=1	--	--	--	--	--	--	--	--	KOG4091	Transcription factor
Cluster-35353.22335	RHD	Cluster-35353.22335	UP	1.4103	7.84e-11	2471	9731204	XP_018902616.1	1884	6.2e-208	PREDICTED: dnaJ homolog subfamily C member 1 [Bemisia tabaci]	XM_019047071.1	XM_019047071	2091	0	PREDICTED: Bemisia tabaci dnaJ homolog subfamily C member 1 (LOC109034113), mRNA	K09521	DNAJC1	DnaJ homolog subfamily C member 1	http://www.genome.jp/dbget-bin/www_bget?ko:K09521	Q61712	302	6.3e-26	DnaJ homolog subfamily C member 1 OS=Mus musculus GN=Dnajc1 PE=1 SV=1	PF00334//PF07074	Nucleoside diphosphate kinase//Translocon-associated protein, gamma subunit (TRAP-gamma)	GO:0006613//GO:0006165//GO:0006241//GO:0006183//GO:0006206//GO:0006144//GO:0006228	cotranslational protein targeting to membrane//nucleoside diphosphate phosphorylation//CTP biosynthetic process//GTP biosynthetic process//pyrimidine nucleobase metabolic process//purine nucleobase metabolic process//UTP biosynthetic process	GO:0004550	nucleoside diphosphate kinase activity	GO:0030176//GO:0005784	integral component of endoplasmic reticulum membrane//Sec61 translocon complex	KOG0724	Zuotin and related molecular chaperones (DnaJ superfamily), contains DNA-binding domains
Cluster-35353.42194	MBD	Cluster-35353.42194	UP	1.3239	5.33e-13	6607	9731545	XP_018902999.1	6719	0	PREDICTED: nuclear receptor corepressor 1-like isoform X4 [Bemisia tabaci]	XM_019047454.1	XM_019047454	5680	0	PREDICTED: Bemisia tabaci nuclear receptor corepressor 2-like (LOC109034359), transcript variant X5, mRNA	K04650	NCOR1, N-CoR	nuclear receptor co-repressor 1	http://www.genome.jp/dbget-bin/www_bget?ko:K04650	Q4KKX4	657	1.2e-66	Nuclear receptor corepressor 1 OS=Xenopus tropicalis GN=ncor1 PE=2 SV=1	--	--	--	--	--	--	--	--	KOG1878	Nuclear receptor coregulator SMRT/SMRTER, contains Myb-like domains
Cluster-35353.36604	HTH	Cluster-35353.36604	UP	1.9206	3.48e-20	796	5394880	XP_011503978.1	256	1.2e-19	PREDICTED: glycine-rich protein 2 [Ceratosolen solmsi marchali]	--	--	--	--	--	K18754	LIN28	protein lin-28	http://www.genome.jp/dbget-bin/www_bget?ko:K18754	Q89A90	257	3.4e-21	Cold shock-like protein CspE OS=Buchnera aphidicola subsp. Baizongia pistaciae (strain Bp) GN=cspE PE=3 SV=3	PF00313	'Cold-shock' DNA-binding domain	GO:0006355	regulation of transcription, DNA-templated	GO:0003677	DNA binding	--	--	KOG3070	Predicted RNA-binding protein containing PIN domain and invovled in translation or RNA processing
Cluster-35353.11866	CSL	Cluster-35353.11866	UP	2.5652	5.16e-12	6194	9765975	XP_018911528.1	3910	0	PREDICTED: homeobox protein cut isoform X4 [Bemisia tabaci]	XM_019055983.1	XM_019055983	2758	0	PREDICTED: Bemisia tabaci homeobox protein cut (LOC109040165), transcript variant X5, mRNA	K09313	CUTL	homeobox protein cut-like	http://www.genome.jp/dbget-bin/www_bget?ko:K09313	P10180	815	5.2e-85	Homeobox protein cut OS=Drosophila melanogaster GN=ct PE=1 SV=1	PF00046//PF05920//PF01585//PF10473//PF00781//PF02376//PF10186	Homeobox domain//Homeobox KN domain//G-patch domain//Leucine-rich repeats of kinetochore protein Cenp-F/LEK1//Diacylglycerol kinase catalytic domain//CUT domain//Vacuolar sorting 38 and autophagy-related subunit 14	GO:0006355//GO:0010508	regulation of transcription, DNA-templated//positive regulation of autophagy	GO:0003676//GO:0045502//GO:0003677//GO:0008134//GO:0016301//GO:0042803	nucleic acid binding//dynein binding//DNA binding//transcription factor binding//kinase activity//protein homodimerization activity	GO:0005667//GO:0030286	transcription factor complex//dynein complex	KOG2252	CCAAT displacement protein and related homeoproteins
Cluster-35353.11192	HSF	Cluster-35353.11192	UP	4.2995	0.0073618	3132	9730685	XP_018902034.1	2398	2e-267	PREDICTED: hepatocyte nuclear factor 6 [Bemisia tabaci]	XM_019046489.1	XM_019046489	2959	0	PREDICTED: Bemisia tabaci hepatocyte nuclear factor 6 (LOC109033735), mRNA	K08026	ONECUT1, HNF6	one cut domain, family member 1, hepatocyte nuclear factor 6	http://www.genome.jp/dbget-bin/www_bget?ko:K08026	Q9UBC0	743	5.8e-77	Hepatocyte nuclear factor 6 OS=Homo sapiens GN=ONECUT1 PE=2 SV=1	PF02376//PF14999//PF00046//PF05920//PF01213	CUT domain//Shadow of prion protein, neuroprotective//Homeobox domain//Homeobox KN domain//Adenylate cyclase associated (CAP) N terminal	GO:0006355//GO:0007010	regulation of transcription, DNA-templated//cytoskeleton organization	GO:0003677//GO:0003779	DNA binding//actin binding	GO:0031225	anchored component of membrane	KOG2252	CCAAT displacement protein and related homeoproteins
Cluster-35353.51804	MH1	Cluster-35353.51804	UP	2.7794	4.52e-05	2554	9722297	XP_018902896.1	945	4.9e-99	PREDICTED: doublesex- and mab-3-related transcription factor 1-like isoform X2 [Bemisia tabaci]	XM_019047351.1	XM_019047351	812	0	PREDICTED: Bemisia tabaci doublesex- and mab-3-related transcription factor 1-like (LOC109034288), transcript variant X2, mRNA	--	--	--	--	P23023	166	3.9e-10	Protein doublesex OS=Drosophila melanogaster GN=dsx PE=1 SV=1	--	--	--	--	--	--	--	--	KOG3815	Transcription factor Doublesex
Cluster-35353.54334	PAX	Cluster-35353.54334	UP	2.0499	3.64e-18	2771	9732199	XP_018903725.1	2188	3.9e-243	PREDICTED: ets DNA-binding protein pokkuri isoform X1 [Bemisia tabaci]	XM_019048180.1	XM_019048180	2619	0	PREDICTED: Bemisia tabaci ets DNA-binding protein pokkuri (LOC109034819), transcript variant X1, mRNA	K03211	ETV6_7, yan	ETS translocation variant 6/7	http://www.genome.jp/dbget-bin/www_bget?ko:K03211	Q01842	509	7e-50	Ets DNA-binding protein pokkuri OS=Drosophila melanogaster GN=aop PE=1 SV=2	PF00178//PF02198	Ets-domain//Sterile alpha motif (SAM)/Pointed domain	GO:0006355	regulation of transcription, DNA-templated	GO:0043565//GO:0003700	sequence-specific DNA binding//transcription factor activity, sequence-specific DNA binding	GO:0005667//GO:0005634	transcription factor complex//nucleus	KOG3804	Transcription factor NERF and related proteins, contain ETS domain
Cluster-35353.10862	Pou	Cluster-35353.10862	UP	5.442	0.00081001	2040	9727115	XP_018898048.1	1302	1.6e-140	PREDICTED: transcriptional regulator ERG homolog isoform X2 [Bemisia tabaci]	XM_019042503.1	XM_019042503	1813	0	PREDICTED: Bemisia tabaci transcriptional regulator ERG homolog (LOC109031151), transcript variant X2, mRNA	K09436	FLI1	friend leukemia integration 1 transcription factor	http://www.genome.jp/dbget-bin/www_bget?ko:K09436	P29774	784	6.7e-82	DNA-binding protein D-ETS-3 OS=Drosophila melanogaster GN=Ets65A PE=2 SV=3	PF16045//PF00447//PF00178	LisH//HSF-type DNA-binding//Ets-domain	GO:0006355	regulation of transcription, DNA-templated	GO:0005515//GO:0003700//GO:0043565	protein binding//transcription factor activity, sequence-specific DNA binding//sequence-specific DNA binding	GO:0005634//GO:0005667	nucleus//transcription factor complex	KOG3806	Predicted transcription factor
Cluster-35353.31567	RXR-like	Cluster-35353.31567	UP	1.3818	4.79e-14	7716	9726536	XP_018897413.1	1664	6.2e-182	PREDICTED: uncharacterized protein LOC109030753 isoform X5 [Bemisia tabaci]	XM_019041866.1	XM_019041866	5516	0	PREDICTED: Bemisia tabaci uncharacterized LOC109030753 (LOC109030753), transcript variant X3, mRNA	K04491	TCF7L2	transcription factor 7-like 2	http://www.genome.jp/dbget-bin/www_bget?ko:K04491	P91943	1008	2.7e-107	Protein pangolin, isoforms A/H/I/S OS=Drosophila melanogaster GN=pan PE=1 SV=1	--	--	--	--	--	--	--	--	KOG3248	Transcription factor TCF-4
Cluster-35353.39430	T-box	Cluster-35353.39430	DOWN	-1.108	1.32e-09	4138	9733149	XP_018904776.1	2431	3.9e-271	PREDICTED: histone H4 transcription factor-like [Bemisia tabaci]	XM_019049231.1	XM_019049231	1569	0	PREDICTED: Bemisia tabaci histone H4 transcription factor-like (LOC109035558), mRNA	--	--	--	--	Q9BQA5	845	1.1e-88	Histone H4 transcription factor OS=Homo sapiens GN=HINFP PE=1 SV=2	PF13465//PF00096	Zinc-finger double domain//Zinc finger, C2H2 type	--	--	GO:0046872	metal ion binding	--	--	--	--
Cluster-35353.44629	zf-BED	Cluster-35353.44629	UP	2.1097	8.02e-18	2229	9766431	XP_018912033.1	2072	8.8e-230	PREDICTED: cyclic AMP-responsive element-binding protein 3-like protein 3-A [Bemisia tabaci]	XM_019056488.1	XM_019056488	2018	0	PREDICTED: Bemisia tabaci cyclic AMP-responsive element-binding protein 3-like protein 3-A (LOC109040510), mRNA	K09048	CREB3	cyclic AMP-responsive element-binding protein 3	http://www.genome.jp/dbget-bin/www_bget?ko:K09048	Q5RCM9	210	2.7e-15	Cyclic AMP-responsive element-binding protein 3-like protein 2 OS=Pongo abelii GN=CREB3L2 PE=2 SV=1	--	--	--	--	--	--	--	--	KOG0709	CREB/ATF family transcription factor
Cluster-35353.52391	Tub	Cluster-35353.52391	UP	1.9629	6.34e-26	3239	9739406	XP_018916479.1	2925	0	PREDICTED: forkhead box protein K1 isoform X2 [Bemisia tabaci]	XM_019060934.1	XM_019060934	3145	0	PREDICTED: Bemisia tabaci forkhead box protein K1 (LOC109043648), transcript variant X2, mRNA	K09404	FOXK	forkhead box protein K	http://www.genome.jp/dbget-bin/www_bget?ko:K09404	P85037	579	6.3e-58	Forkhead box protein K1 OS=Homo sapiens GN=FOXK1 PE=1 SV=1	PF00250//PF00498	Forkhead domain//FHA domain	GO:0006355	regulation of transcription, DNA-templated	GO:0005515//GO:0003700//GO:0043565	protein binding//transcription factor activity, sequence-specific DNA binding//sequence-specific DNA binding	GO:0005667	transcription factor complex	KOG2294	Transcription factor of the Forkhead/HNF3 family
Cluster-35353.38992	COE	Cluster-35353.38992	DOWN	-1.009	5.19e-09	1757	9724148	XP_018917477.1	1461	4.9e-159	PREDICTED: high mobility group protein 20A-like [Bemisia tabaci]	XM_019061932.1	XM_019061932	1325	0	PREDICTED: Bemisia tabaci high mobility group protein 20A-like (LOC109044288), mRNA	--	--	--	--	Q9NP66	686	1.3e-70	High mobility group protein 20A OS=Homo sapiens GN=HMG20A PE=1 SV=1	PF09482	Bacterial type III secretion apparatus protein (OrgA_MxiK)	GO:0009405	pathogenesis	--	--	--	--	--	--
Cluster-35353.18591	CG-1	Cluster-35353.18591	UP	1.4667	2.34e-10	3268	9736328	XP_018907616.1	1347	1.5e-145	PREDICTED: forkhead box protein O isoform X2 [Bemisia tabaci]	XM_019052070.1	XM_019052070	3154	0	PREDICTED: Bemisia tabaci forkhead box protein O (LOC109037412), transcript variant X1, mRNA	K12358	FOXO4	forkhead box protein O4	http://www.genome.jp/dbget-bin/www_bget?ko:K12358	Q95V55	721	2.2e-74	Forkhead box protein O OS=Drosophila melanogaster GN=foxo PE=1 SV=1	--	--	--	--	--	--	--	--	KOG2294	Transcription factor of the Forkhead/HNF3 family
Cluster-35353.35774	Runt	Cluster-35353.35774	UP	2.6275	1.03e-19	3718	9765282	XP_018910750.1	1912	5.3e-211	PREDICTED: forkhead box protein N2-like [Bemisia tabaci]	XM_019055205.1	XM_019055205	3401	0	PREDICTED: Bemisia tabaci forkhead box protein N2-like (LOC109039629), mRNA	K09396	FOXC	forkhead box protein C	http://www.genome.jp/dbget-bin/www_bget?ko:K09396	Q68F77	355	6.8e-32	Forkhead box protein C1 OS=Xenopus tropicalis GN=foxc1 PE=2 SV=1	PF00250//PF15088	Forkhead domain//NADH dehydrogenase [ubiquinone] 1 subunit C1, mitochondrial	GO:0006355	regulation of transcription, DNA-templated	GO:0003700//GO:0043565	transcription factor activity, sequence-specific DNA binding//sequence-specific DNA binding	GO:0005747//GO:0005739//GO:0005667	mitochondrial respiratory chain complex I//mitochondrion//transcription factor complex	--	--
Cluster-35353.31682	zf-GATA	Cluster-35353.31682	UP	2.9475	5.01e-32	6374	9764847	XP_018910262.1	3669	0	PREDICTED: rho-related BTB domain-containing protein 1 [Bemisia tabaci]	XM_019054718.1	XM_019054718	6214	0	PREDICTED: Bemisia tabaci rho-related BTB domain-containing protein 1 (LOC109039295), transcript variant X2, mRNA	K07868	RHOBTB1_2	Rho-related BTB domain-containing protein 1/2	http://www.genome.jp/dbget-bin/www_bget?ko:K07868	O94844	1209	1.1e-130	Rho-related BTB domain-containing protein 1 OS=Homo sapiens GN=RHOBTB1 PE=2 SV=2	PF08477//PF00071//PF00651	Ras of Complex, Roc, domain of DAPkinase//Ras family//BTB/POZ domain	GO:0007264	small GTPase mediated signal transduction	GO:0005525//GO:0005515	GTP binding//protein binding	--	--	--	--
Cluster-35353.52268	zf-MIZ	Cluster-35353.52268	UP	1.2059	4.48e-08	2218	9736536	XP_018907844.1	3219	0	PREDICTED: BTB..POZ domain-containing protein 9 [Bemisia tabaci]	XM_019052299.1	XM_019052299	2100	0	PREDICTED: Bemisia tabaci BTB/POZ domain-containing protein 9 (LOC109037563), mRNA	--	--	--	--	Q96Q07	1737	2.3e-192	BTB/POZ domain-containing protein 9 OS=Homo sapiens GN=BTBD9 PE=2 SV=2	PF00651	BTB/POZ domain	--	--	GO:0005515	protein binding	--	--	KOG4350	Uncharacterized conserved protein, contains BTB/POZ domain
Cluster-35353.12235	ZBTB	Cluster-35353.12235	UP	3.2316	5.65e-07	4475	9733939	XP_018905661.1	1746	1.1e-191	PREDICTED: silk gland factor 1 [Bemisia tabaci]	XM_019050116.1	XM_019050116	2856	0	PREDICTED: Bemisia tabaci silk gland factor 1 (LOC109036145), mRNA	K08035	FOXA2, HNF3B	forkhead box protein A2, hepatocyte nuclear factor 3-beta	http://www.genome.jp/dbget-bin/www_bget?ko:K08035	P14734	880	1.1e-92	Protein fork head OS=Drosophila melanogaster GN=fkh PE=1 SV=1	PF08430//PF00250	Forkhead N-terminal region//Forkhead domain	GO:0006355	regulation of transcription, DNA-templated	GO:0008134//GO:0019904//GO:0043565//GO:0003700	transcription factor binding//protein domain specific binding//sequence-specific DNA binding//transcription factor activity, sequence-specific DNA binding	GO:0005667	transcription factor complex	KOG3563	Forkhead/HNF-3-related transcription factor
Cluster-35353.43014	bHLH	Cluster-35353.43014	UP	2.5932	0.005933	1549	9727804	XP_018898830.1	826	1.9e-85	PREDICTED: uncharacterized protein LOC109031643 isoform X2 [Bemisia tabaci]	XM_019043285.1	XM_019043285	362	0	PREDICTED: Bemisia tabaci uncharacterized LOC109031643 (LOC109031643), transcript variant X2, mRNA	K09403	FOXJ2_3	forkhead box protein J2/3	http://www.genome.jp/dbget-bin/www_bget?ko:K09403	Q9P0K8	181	4.2e-12	Forkhead box protein J2 OS=Homo sapiens GN=FOXJ2 PE=1 SV=1	PF00250//PF12142	Forkhead domain//Polyphenol oxidase middle domain	GO:0006118//GO:0055114//GO:0006570//GO:0006355	obsolete electron transport//oxidation-reduction process//tyrosine metabolic process//regulation of transcription, DNA-templated	GO:0003700//GO:0004097//GO:0043565	transcription factor activity, sequence-specific DNA binding//catechol oxidase activity//sequence-specific DNA binding	GO:0005667	transcription factor complex	KOG2294	Transcription factor of the Forkhead/HNF3 family
Cluster-35353.49913	ZBTB	Cluster-35353.49913	UP	1.3237	3.12e-09	9075	9727747	XP_018898765.1	7366	0	PREDICTED: zinc finger homeobox protein 3 isoform X2 [Bemisia tabaci]	XM_019043223.1	XM_019043223	8805	0	PREDICTED: Bemisia tabaci zinc finger homeobox protein 3 (LOC109031617), transcript variant X6, mRNA	K09378	ATBF1	AT-binding transcription factor 1	http://www.genome.jp/dbget-bin/www_bget?ko:K09378	Q9JJN2	1182	2.1e-127	Zinc finger homeobox protein 4 OS=Mus musculus GN=Zfhx4 PE=1 SV=1	PF00096//PF13912//PF06423//PF00046//PF05920//PF13411	Zinc finger, C2H2 type//C2H2-type zinc finger//GWT1//Homeobox domain//Homeobox KN domain//MerR HTH family regulatory protein	GO:0006355//GO:0006506	regulation of transcription, DNA-templated//GPI anchor biosynthetic process	GO:0046872//GO:0016746//GO:0003677	metal ion binding//transferase activity, transferring acyl groups//DNA binding	GO:0016021//GO:0005789	integral component of membrane//endoplasmic reticulum membrane	KOG1146	Homeobox protein
Cluster-35353.52579	bHLH	Cluster-35353.52579	UP	2.8987	0.0083068	853	9727804	XP_018898830.1	631	4.2e-63	PREDICTED: uncharacterized protein LOC109031643 isoform X2 [Bemisia tabaci]	XM_019043284.1	XM_019043284	469	0	PREDICTED: Bemisia tabaci uncharacterized LOC109031643 (LOC109031643), transcript variant X1, mRNA	--	--	--	--	Q61574	172	2.6e-11	Forkhead box protein S1 OS=Mus musculus GN=Foxs1 PE=2 SV=2	--	--	--	--	--	--	--	--	--	--
Cluster-35353.39030	bHLH	Cluster-35353.39030	UP	3.3168	0.024206	750	9727804	XP_018898830.1	703	1.6e-71	PREDICTED: uncharacterized protein LOC109031643 isoform X2 [Bemisia tabaci]	XM_019043285.1	XM_019043285	516	0	PREDICTED: Bemisia tabaci uncharacterized LOC109031643 (LOC109031643), transcript variant X2, mRNA	--	--	--	--	Q28D67	143	5.2e-08	Forkhead box protein I1c OS=Xenopus tropicalis GN=foxi1c PE=2 SV=1	--	--	--	--	--	--	--	--	--	--
Cluster-35353.39815	bHLH	Cluster-35353.39815	UP	1.2729	2.89e-09	2592	9736329	XP_018907617.1	1623	1.2e-177	PREDICTED: transcription factor Sox-11-like [Bemisia tabaci]	XM_019052072.1	XM_019052072	2403	0	PREDICTED: Bemisia tabaci transcription factor Sox-11-like (LOC109037414), mRNA	K09268	SOX4_11_12	transcription factor SOX4/11/12 (SOX group C)	http://www.genome.jp/dbget-bin/www_bget?ko:K09268	P40656	425	3.6e-40	Putative transcription factor SOX-14 OS=Drosophila melanogaster GN=Sox14 PE=2 SV=3	--	--	--	--	--	--	--	--	KOG0527	HMG-box transcription factor
Cluster-35353.46939	C/EBP	Cluster-35353.46939	UP	4.8497	4.04e-07	2300	9723730	XP_018917012.1	1409	6.9e-153	PREDICTED: transcription factor SOX-21-like isoform X1 [Bemisia tabaci]	XM_019061468.1	XM_019061468	2038	0	PREDICTED: Bemisia tabaci transcription factor SOX-21-like (LOC109044014), transcript variant X2, mRNA	K09267	SOX1S	transcription factor SOX1/3/14/21 (SOX group B)	http://www.genome.jp/dbget-bin/www_bget?ko:K09267	Q9W7R5	450	4.1e-43	Transcription factor SOX-21 OS=Gallus gallus GN=SOX21 PE=2 SV=1	PF12336	SOX transcription factor	GO:0006355	regulation of transcription, DNA-templated	--	--	--	--	KOG0527	HMG-box transcription factor
Cluster-35353.47510	zf-C2H2	Cluster-35353.47510	UP	1.5182	3.45e-10	4110	9723294	XP_018913565.1	2172	4.1e-241	PREDICTED: protein tramtrack, alpha isoform-like isoform X3 [Bemisia tabaci]	XM_019058020.1	XM_019058020	3233	0	PREDICTED: Bemisia tabaci protein tramtrack, alpha isoform-like (LOC109041604), transcript variant X5, mRNA	K09237	TTK	tramtrack	http://www.genome.jp/dbget-bin/www_bget?ko:K09237	P42282	542	1.6e-53	Protein tramtrack, alpha isoform OS=Drosophila melanogaster GN=ttk PE=1 SV=3	PF00651//PF13465//PF13912//PF08157//PF10598//PF00096	BTB/POZ domain//Zinc-finger double domain//C2H2-type zinc finger//NUC129 domain//RNA recognition motif of the spliceosomal PrP8//Zinc finger, C2H2 type	--	--	GO:0005515//GO:0046872//GO:0003723	protein binding//metal ion binding//RNA binding	GO:0005634	nucleus	--	--
Cluster-35353.53031	MYB	Cluster-35353.53031	UP	3.4886	1.71e-05	3394	9722067	XP_018900380.1	2976	0	PREDICTED: putative transcription factor SOX-15 [Bemisia tabaci]	XM_019044835.1	XM_019044835	2713	0	PREDICTED: Bemisia tabaci putative transcription factor SOX-15 (LOC109032605), mRNA	K04495	SOX17	transcription factor SOX17 (SOX group F)	http://www.genome.jp/dbget-bin/www_bget?ko:K04495	P40657	442	5.1e-42	Putative transcription factor SOX-15 OS=Drosophila melanogaster GN=Sox15 PE=2 SV=2	PF05791	Bacillus haemolytic enterotoxin (HBL)	GO:0009405	pathogenesis	--	--	GO:0016020	membrane	KOG0527	HMG-box transcription factor
Cluster-35353.21632	CUT	Cluster-35353.21632	UP	1.0754	2.01e-06	3249	9729423	XP_018900636.1	3647	0	PREDICTED: uncharacterized protein LOC109032794 [Bemisia tabaci]	XM_019045091.1	XM_019045091	2964	0	PREDICTED: Bemisia tabaci uncharacterized LOC109032794 (LOC109032794), mRNA	--	--	--	--	Q6ZNA1	150	3.5e-08	Zinc finger protein 836 OS=Homo sapiens GN=ZNF836 PE=2 SV=2	PF06467//PF00821//PF00096//PF13465	MYM-type Zinc finger with FCS sequence motif//Phosphoenolpyruvate carboxykinase//Zinc finger, C2H2 type//Zinc-finger double domain	GO:0006094	gluconeogenesis	GO:0004611//GO:0046872//GO:0008270//GO:0005525	phosphoenolpyruvate carboxykinase activity//metal ion binding//zinc ion binding//GTP binding	--	--	KOG1721	FOG: Zn-finger
Cluster-35353.46132	ETS	Cluster-35353.46132	UP	1.837	1.93e-08	2597	9764382	XP_018909740.1	1785	2e-196	PREDICTED: homeobox protein SIX6-like [Bemisia tabaci]	XM_019054195.1	XM_019054195	1597	0	PREDICTED: Bemisia tabaci homeobox protein SIX6-like (LOC109038923), mRNA	K15615	SIX4	homeobox protein SIX4	http://www.genome.jp/dbget-bin/www_bget?ko:K15615	Q61321	614	4.4e-62	Homeobox protein SIX4 OS=Mus musculus GN=Six4 PE=1 SV=1	PF05920//PF00046	Homeobox KN domain//Homeobox domain	GO:0006355	regulation of transcription, DNA-templated	GO:0003677	DNA binding	--	--	KOG0775	Transcription factor SIX and related HOX domain proteins
Cluster-35353.43228	HMG	Cluster-35353.43228	UP	5.3196	1.14e-23	1657	9725437	XP_018896200.1	1492	1.2e-162	PREDICTED: homeobox protein vnd-like isoform X1 [Bemisia tabaci]	XM_019040655.1	XM_019040655	1054	0	PREDICTED: Bemisia tabaci homeobox protein vnd-like (LOC109029937), transcript variant X1, mRNA	K08029	NKX2-2	homeobox protein Nkx-2.2	http://www.genome.jp/dbget-bin/www_bget?ko:K08029	P22808	409	1.7e-38	Homeobox protein vnd OS=Drosophila melanogaster GN=vnd PE=1 SV=3	PF00046	Homeobox domain	--	--	GO:0003677	DNA binding	--	--	KOG0842	Transcription factor tinman/NKX2-3, contains HOX domain
Cluster-35353.29284	zf-C2H2	Cluster-35353.29284	UP	3.6047	4.76e-12	2684	9743671	XP_018908422.1	715	2.4e-72	PREDICTED: homeotic protein Sex combs reduced isoform X2 [Bemisia tabaci]	XM_019052876.1	XM_019052876	1712	0	PREDICTED: Bemisia tabaci homeotic protein Sex combs reduced (LOC109037978), transcript variant X1, mRNA	K09311	ANTP	Antp family, other	http://www.genome.jp/dbget-bin/www_bget?ko:K09311	P09077	491	8.3e-48	Homeotic protein Sex combs reduced OS=Drosophila melanogaster GN=Scr PE=1 SV=5	PF00046//PF05920	Homeobox domain//Homeobox KN domain	GO:0006355	regulation of transcription, DNA-templated	GO:0003677	DNA binding	--	--	--	--
Cluster-35353.50248	HMG	Cluster-35353.50248	DOWN	-1.1306	6.79e-10	3270	9734964	XP_018912773.1	3338	0	PREDICTED: zinc finger protein 260-like [Bemisia tabaci]	XM_019057228.1	XM_019057228	2966	0	PREDICTED: Bemisia tabaci zinc finger protein 260-like (LOC109041067), mRNA	--	--	--	--	Q6DDV0	314	3.4e-27	Myoneurin OS=Xenopus laevis GN=mynn PE=2 SV=1	PF00096//PF02892//PF13465//PF13639//PF14634//PF09415	Zinc finger, C2H2 type//BED zinc finger//Zinc-finger double domain//Ring finger domain//zinc-RING finger domain//CENP-S associating Centromere protein X	GO:0006281//GO:0051382	DNA repair//kinetochore assembly	GO:0008270//GO:0003677//GO:0005515//GO:0046872	zinc ion binding//DNA binding//protein binding//metal ion binding	--	--	--	--
Cluster-35353.10096	Fork head	Cluster-35353.10096	UP	3.4003	1.19e-15	4797	9743025	XP_018908410.1	673	3.2e-67	PREDICTED: homeotic protein antennapedia-like isoform X1 [Bemisia tabaci]	XM_019052869.1	XM_019052869	4278	0	PREDICTED: Bemisia tabaci homeotic protein antennapedia-like (LOC109037973), transcript variant X5, mRNA	K09307	HOX_7	homeobox protein HoxA/B7	http://www.genome.jp/dbget-bin/www_bget?ko:K09307	P02833	369	2.1e-33	Homeotic protein antennapedia OS=Drosophila melanogaster GN=Antp PE=1 SV=1	PF02932//PF03153//PF00046	Neurotransmitter-gated ion-channel transmembrane region//Transcription factor IIA, alpha/beta subunit//Homeobox domain	GO:0006811//GO:0006367	ion transport//transcription initiation from RNA polymerase II promoter	GO:0003677	DNA binding	GO:0005672//GO:0016020	transcription factor TFIIA complex//membrane	--	--
Cluster-35353.15951	Fork head	Cluster-35353.15951	DOWN	-1.3522	2.5e-13	8792	9739614	XP_018916702.1	1473	1e-159	PREDICTED: zinc finger protein 615 [Bemisia tabaci]	XM_019061157.1	XM_019061157	5103	0	PREDICTED: Bemisia tabaci zinc finger protein 615 (LOC109043839), mRNA	--	--	--	--	Q62981	222	4.3e-16	Zinc finger protein 260 OS=Rattus norvegicus GN=Znf260 PE=1 SV=1	PF00096//PF00412//PF02048//PF13912//PF13465	Zinc finger, C2H2 type//LIM domain//Heat-stable enterotoxin ST//C2H2-type zinc finger//Zinc-finger double domain	GO:0009405	pathogenesis	GO:0046872//GO:0008270	metal ion binding//zinc ion binding	GO:0005576	extracellular region	--	--
Cluster-35353.17346	ZBTB	Cluster-35353.17346	UP	3.3823	1.42e-11	1800	9743674	XP_018908425.1	1138	1.4e-121	PREDICTED: muscle segmentation homeobox [Bemisia tabaci]	XM_019052880.1	XM_019052880	1204	0	PREDICTED: Bemisia tabaci muscle segmentation homeobox (LOC109037982), mRNA	K09341	MSX	homeobox protein MSX	http://www.genome.jp/dbget-bin/www_bget?ko:K09341	Q03372	490	7.3e-48	Muscle segmentation homeobox OS=Drosophila melanogaster GN=Dr PE=2 SV=2	PF01021//PF00046	TYA transposon protein//Homeobox domain	--	--	GO:0003723//GO:0003677	RNA binding//DNA binding	GO:0005737	cytoplasm	KOG0492	Transcription factor MSH, contains HOX domain
Cluster-35353.45759	ZBTB	Cluster-35353.45759	UP	3.7817	1.14e-10	3466	9723172	XP_018912329.1	1736	1.3e-190	PREDICTED: LIM..homeobox protein Lhx5 isoform X1 [Bemisia tabaci]	XM_019056793.1	XM_019056793	3148	0	PREDICTED: Bemisia tabaci LIM/homeobox protein Lhx5 (LOC109040748), transcript variant X2, mRNA	K09372	LHX1	LIM homeobox protein 1	http://www.genome.jp/dbget-bin/www_bget?ko:K09372	P53411	804	5.5e-84	LIM/homeobox protein Lhx1 OS=Gallus gallus GN=LHX1 PE=2 SV=1	PF05920//PF00412//PF00046	Homeobox KN domain//LIM domain//Homeobox domain	GO:0006355	regulation of transcription, DNA-templated	GO:0003677//GO:0008270	DNA binding//zinc ion binding	--	--	KOG4577	Transcription factor LIM3, contains LIM and HOX domains
Cluster-35353.23320	Fork head	Cluster-35353.23320	UP	1.4961	2.75e-07	7416	9721338	XP_018900434.1	3203	0	PREDICTED: segmentation protein cap'n'collar isoform X1 [Bemisia tabaci]	XM_019044889.1	XM_019044889	6671	0	PREDICTED: Bemisia tabaci segmentation protein cap'n'collar (LOC109032619), transcript variant X1, mRNA	K09041	NFE2N, CNC	nuclear factor erythroid 2, invertebrate	http://www.genome.jp/dbget-bin/www_bget?ko:K09041	P20482	679	3.7e-69	Segmentation protein cap'n'collar OS=Drosophila melanogaster GN=cnc PE=2 SV=3	PF07716//PF03131//PF13954//PF12179//PF00170	Basic region leucine zipper//bZIP Maf transcription factor//PapC N-terminal domain//I-kappa-kinase-beta NEMO binding domain//bZIP transcription factor	GO:0016310//GO:0006355//GO:0009069	phosphorylation//regulation of transcription, DNA-templated//serine family amino acid metabolic process	GO:0005515//GO:0003700//GO:0003677//GO:0043565//GO:0008384	protein binding//transcription factor activity, sequence-specific DNA binding//DNA binding//sequence-specific DNA binding//IkappaB kinase activity	GO:0008385//GO:0005667//GO:0005634	IkappaB kinase complex//transcription factor complex//nucleus	KOG3863	bZIP transcription factor NRF1
Cluster-35353.51952	Fork head	Cluster-35353.51952	UP	1.0985	7.66e-05	2039	9733495	XP_018905163.1	2209	1e-245	PREDICTED: nuclear factor of activated T-cells 5 isoform X1 [Bemisia tabaci]	XM_019049618.1	XM_019049618	1356	0	PREDICTED: Bemisia tabaci nuclear factor of activated T-cells 5 (LOC109035827), transcript variant X1, mRNA	K17335	NFAT5	nuclear factor of activated T-cells 5	http://www.genome.jp/dbget-bin/www_bget?ko:K17335	O94916	745	2.2e-77	Nuclear factor of activated T-cells 5 OS=Homo sapiens GN=NFAT5 PE=1 SV=1	--	--	--	--	--	--	--	--	--	--
Cluster-35353.29794	Fork head	Cluster-35353.29794	UP	1.0337	0.00011286	1646	9734342	XP_018906110.1	1287	6.9e-139	PREDICTED: methyl-CpG-binding domain protein 2 [Bemisia tabaci]	XM_019050565.1	XM_019050565	1597	0	PREDICTED: Bemisia tabaci methyl-CpG-binding domain protein 2 (LOC109036381), transcript variant X1, mRNA	K11590	MBD2	methyl-CpG-binding domain protein 2	http://www.genome.jp/dbget-bin/www_bget?ko:K11590	Q9Z2E1	660	1.3e-67	Methyl-CpG-binding domain protein 2 OS=Mus musculus GN=Mbd2 PE=2 SV=2	--	--	--	--	--	--	--	--	--	--
Cluster-35353.68770	Fork head	Cluster-35353.68770	UP	1.8112	0.00065416	2711	9731439	XP_018902880.1	1785	2e-196	PREDICTED: uncharacterized protein LOC109034281 [Bemisia tabaci]	XM_019047335.1	XM_019047335	2381	0	PREDICTED: Bemisia tabaci uncharacterized LOC109034281 (LOC109034281), mRNA	--	--	--	--	P52950	411	1.6e-38	Homeobox protein DBX1 OS=Mus musculus GN=Dbx1 PE=2 SV=1	PF00046//PF05920	Homeobox domain//Homeobox KN domain	GO:0006355	regulation of transcription, DNA-templated	GO:0003677	DNA binding	--	--	--	--
Cluster-35353.64627	HMG	Cluster-35353.64627	UP	3.5073	2.11e-07	2380	9765490	XP_018910982.1	2016	2.9e-223	PREDICTED: homeobox protein araucan [Bemisia tabaci]	XM_019055437.1	XM_019055437	1827	0	PREDICTED: Bemisia tabaci homeobox protein araucan (LOC109039780), mRNA	--	--	--	--	Q24248	474	6.9e-46	Homeobox protein araucan OS=Drosophila melanogaster GN=ara PE=1 SV=2	--	--	--	--	--	--	--	--	KOG0773	Transcription factor MEIS1 and related HOX domain proteins
Cluster-35353.43154	HMG	Cluster-35353.43154	UP	1.406	7.26e-06	3081	9739400	XP_018916472.1	2208	2.1e-245	PREDICTED: zinc finger and BTB domain-containing protein 24-like [Bemisia tabaci]	XM_019060927.1	XM_019060927	2977	0	PREDICTED: Bemisia tabaci zinc finger and BTB domain-containing protein 24-like (LOC109043643), mRNA	--	--	--	--	P18722	244	4.2e-19	Gastrula zinc finger protein XlCGF46.1 (Fragment) OS=Xenopus laevis PE=3 SV=1	--	--	--	--	--	--	--	--	--	--
Cluster-35353.57819	ZBTB	Cluster-35353.57819	UP	4.524	4.68e-07	2323	9732366	XP_018903908.1	2015	3.7e-223	PREDICTED: protein apterous-like [Bemisia tabaci]	XM_019048363.1	XM_019048363	2161	0	PREDICTED: Bemisia tabaci protein apterous-like (LOC109034933), mRNA	K09373	LHX2_9	LIM homeobox protein 2/9	http://www.genome.jp/dbget-bin/www_bget?ko:K09373	P29673	737	2.2e-76	Protein apterous OS=Drosophila melanogaster GN=ap PE=2 SV=1	PF00046//PF00412//PF01213//PF05920	Homeobox domain//LIM domain//Adenylate cyclase associated (CAP) N terminal//Homeobox KN domain	GO:0006355//GO:0007010	regulation of transcription, DNA-templated//cytoskeleton organization	GO:0003677//GO:0008270//GO:0003779	DNA binding//zinc ion binding//actin binding	--	--	KOG0490	Transcription factor, contains HOX domain
Cluster-35353.16308	HMG	Cluster-35353.16308	UP	1.5562	1.8e-07	2324	9722795	XP_018908357.1	2449	1.8e-273	PREDICTED: uncharacterized protein LOC109037934 isoform X2 [Bemisia tabaci]	XM_019052812.1	XM_019052812	2231	0	PREDICTED: Bemisia tabaci uncharacterized LOC109037934 (LOC109037934), transcript variant X2, mRNA	--	--	--	--	Q9W0K7	309	9.2e-27	Protein bric-a-brac 1 OS=Drosophila melanogaster GN=bab1 PE=2 SV=2	PF00651//PF05225//PF04218//PF09339//PF02796//PF01527	BTB/POZ domain//helix-turn-helix, Psq domain//CENP-B N-terminal DNA-binding domain//IclR helix-turn-helix domain//Helix-turn-helix domain of resolvase//Transposase	GO:0006313//GO:0006355//GO:0006310	transposition, DNA-mediated//regulation of transcription, DNA-templated//DNA recombination	GO:0000150//GO:0003677//GO:0004803//GO:0005515	recombinase activity//DNA binding//transposase activity//protein binding	--	--	--	--
Cluster-35353.49812	zf-C2H2	Cluster-35353.49812	UP	1.0953	0.00021017	4408	9738921	XP_018915940.1	3925	0	PREDICTED: zinc finger protein 850-like [Bemisia tabaci]	XM_019060395.1	XM_019060395	1985	0	PREDICTED: Bemisia tabaci zinc finger protein 850-like (LOC109043252), mRNA	--	--	--	--	Q05481	918	4.2e-97	Zinc finger protein 91 OS=Homo sapiens GN=ZNF91 PE=2 SV=2	PF00096//PF16622//PF03568//PF13912//PF13465	Zinc finger, C2H2 type//zinc-finger C2H2-type//Peptidase family C50//C2H2-type zinc finger//Zinc-finger double domain	GO:0006508	proteolysis	GO:0008233//GO:0046872	peptidase activity//metal ion binding	GO:0005634	nucleus	--	--
Cluster-35353.22942	Homeobox	Cluster-35353.22942	UP	2.0324	0.00080241	3345	9724160	XP_018917492.1	1983	2.8e-219	PREDICTED: uncharacterized protein LOC109044299 isoform X1 [Bemisia tabaci]	XM_019061947.1	XM_019061947	2926	0	PREDICTED: Bemisia tabaci uncharacterized LOC109044299 (LOC109044299), transcript variant X1, mRNA	--	--	--	--	Q9UPW6	196	1.7e-13	DNA-binding protein SATB2 OS=Homo sapiens GN=SATB2 PE=1 SV=2	--	--	--	--	--	--	--	--	KOG3755	SATB1 matrix attachment region binding protein
Cluster-35353.53082	Homeobox	Cluster-35353.53082	UP	4.141	1.04e-06	2582	9739027	XP_018916057.1	1331	8.6e-144	PREDICTED: pituitary homeobox homolog Ptx1-like isoform X1 [Bemisia tabaci]	XM_019060512.1	XM_019060512	1623	0	PREDICTED: Bemisia tabaci pituitary homeobox homolog Ptx1-like (LOC109043328), transcript variant X1, mRNA	K04686	PITX2	paired-like homeodomain transcription factor 2	http://www.genome.jp/dbget-bin/www_bget?ko:K04686	O18400	655	7.7e-67	Pituitary homeobox homolog Ptx1 OS=Drosophila melanogaster GN=Ptx1 PE=2 SV=2	--	--	--	--	--	--	--	--	KOG0486	Transcription factor PTX1, contains HOX domain
Cluster-35353.47028	Homeobox	Cluster-35353.47028	DOWN	-1.6448	1.24e-17	634	9766617	XP_018912239.1	605	3.2e-60	PREDICTED: zinc finger protein 629-like [Bemisia tabaci]	XM_019056694.1	XM_019056694	351	0	PREDICTED: Bemisia tabaci zinc finger protein 629-like (LOC109040689), mRNA	--	--	--	--	Q8NB50	186	4.6e-13	Zinc finger protein 62 homolog OS=Homo sapiens GN=ZFP62 PE=2 SV=3	PF02892//PF07649//PF13912//PF16622//PF01155//PF05443//PF13465//PF00096	BED zinc finger//C1-like domain//C2H2-type zinc finger//zinc-finger C2H2-type//Hydrogenase/urease nickel incorporation, metallochaperone, hypA//ROS/MUCR transcriptional regulator protein//Zinc-finger double domain//Zinc finger, C2H2 type	GO:0006464//GO:0006355//GO:0055114	cellular protein modification process//regulation of transcription, DNA-templated//oxidation-reduction process	GO:0016151//GO:0008270//GO:0003677//GO:0046872//GO:0047134	nickel cation binding//zinc ion binding//DNA binding//metal ion binding//protein-disulfide reductase activity	--	--	--	--
Cluster-35353.21113	zf-C2H2	Cluster-35353.21113	UP	1.3548	4.13e-06	1400	4178461	XP_006820770.1	481	1.7e-45	PREDICTED: zinc finger protein 850-like, partial [Saccoglossus kowalevskii]	XM_019052212.1	XM_019052212	1256	0	PREDICTED: Bemisia tabaci zinc finger protein 600-like (LOC109037501), mRNA	K09228	KRAB	KRAB domain-containing zinc finger protein	http://www.genome.jp/dbget-bin/www_bget?ko:K09228	Q6IV72	440	3.6e-42	Zinc finger protein 425 OS=Homo sapiens GN=ZNF425 PE=1 SV=1	PF16622//PF02892//PF13912//PF13465//PF07975//PF04810//PF02701//PF00096	zinc-finger C2H2-type//BED zinc finger//C2H2-type zinc finger//Zinc-finger double domain//TFIIH C1-like domain//Sec23/Sec24 zinc finger//Dof domain, zinc finger//Zinc finger, C2H2 type	GO:0006281//GO:0006886//GO:0006888//GO:0006355	DNA repair//intracellular protein transport//ER to Golgi vesicle-mediated transport//regulation of transcription, DNA-templated	GO:0008270//GO:0046872//GO:0003677	zinc ion binding//metal ion binding//DNA binding	GO:0030127	COPII vesicle coat	--	--
Cluster-35353.8731	Homeobox	Cluster-35353.8731	UP	1.5125	0.014599	3525	9723554	XP_018916194.1	1073	9.7e-114	PREDICTED: homeobox protein Hox-A2-like [Bemisia tabaci]	XM_019060649.1	XM_019060649	994	0	PREDICTED: Bemisia tabaci homeobox protein Hox-A2-like (LOC109043445), mRNA	--	--	--	--	O77215	463	1.9e-44	Homeobox protein unc-4 OS=Drosophila melanogaster GN=unc-4 PE=2 SV=1	--	--	--	--	--	--	--	--	KOG0490	Transcription factor, contains HOX domain
Cluster-35353.31584	zf-C2H2	Cluster-35353.31584	UP	1.1963	0.00087514	2060	9739626	XP_018916714.1	2420	3.6e-270	PREDICTED: protein germ cell-less [Bemisia tabaci]	XM_019061169.1	XM_019061169	1746	0	PREDICTED: Bemisia tabaci protein germ cell-less (LOC109043848), mRNA	--	--	--	--	Q01820	680	7.8e-70	Protein germ cell-less OS=Drosophila melanogaster GN=gcl PE=2 SV=1	PF00651//PF08031	BTB/POZ domain//Berberine and berberine like	GO:0055114	oxidation-reduction process	GO:0016491//GO:0050660//GO:0005515	oxidoreductase activity//flavin adenine dinucleotide binding//protein binding	--	--	KOG4682	Uncharacterized conserved protein, contains BTB/POZ domain
Cluster-35353.15135	Homeobox	Cluster-35353.15135	UP	5.8605	0.00078623	1494	9729551	XP_018900777.1	1302	1.1e-140	PREDICTED: pituitary homeobox 2-like, partial [Bemisia tabaci]	XM_019045232.1	XM_019045232	1187	0	PREDICTED: Bemisia tabaci pituitary homeobox 2-like (LOC109032898), partial mRNA	--	--	--	--	Q9TTD8	178	9.1e-12	Homeobox protein prophet of Pit-1 OS=Canis familiaris GN=PROP1 PE=3 SV=1	PF00046//PF08971//PF00175//PF05920	Homeobox domain//Glycogen synthesis protein//Oxidoreductase NAD-binding domain//Homeobox KN domain	GO:0006355//GO:0005978//GO:0055114	regulation of transcription, DNA-templated//glycogen biosynthetic process//oxidation-reduction process	GO:0003677//GO:0016491	DNA binding//oxidoreductase activity	--	--	--	--
Cluster-35353.59830	Homeobox	Cluster-35353.59830	UP	4.1494	0.010026	1278	9764185	XP_018909520.1	1294	8.3e-140	PREDICTED: short stature homeobox protein 2-like [Bemisia tabaci]	XM_019053975.1	XM_019053975	1121	0	PREDICTED: Bemisia tabaci short stature homeobox protein 2-like (LOC109038785), transcript variant X2, mRNA	--	--	--	--	O15266	416	2e-39	Short stature homeobox protein OS=Homo sapiens GN=SHOX PE=1 SV=1	PF00046//PF05920	Homeobox domain//Homeobox KN domain	GO:0006355	regulation of transcription, DNA-templated	GO:0003677	DNA binding	--	--	--	--
Cluster-35353.34779	TF_bZIP	Cluster-35353.34779	UP	1.2501	0.00052904	3929	9723055	XP_018911071.1	2458	2.7e-274	PREDICTED: suppressor of hairless protein [Bemisia tabaci]	XM_019055526.1	XM_019055526	3436	0	PREDICTED: Bemisia tabaci suppressor of hairless protein (LOC109039846), mRNA	--	--	--	--	P28159	1978	4.6e-220	Suppressor of hairless protein OS=Drosophila melanogaster GN=Su(H) PE=1 SV=1	PF05739//PF04277//PF09270//PF09271//PF01833	SNARE domain//Oxaloacetate decarboxylase, gamma chain//Beta-trefoil DNA-binding domain//LAG1, DNA binding//IPT/TIG domain	GO:0006090//GO:0071436//GO:0006560//GO:0006814//GO:0006525//GO:0006355	pyruvate metabolic process//sodium ion export//proline metabolic process//sodium ion transport//arginine metabolic process//regulation of transcription, DNA-templated	GO:0000982//GO:0003677//GO:0008948//GO:0003700//GO:0005515//GO:0015081//GO:0000978	transcription factor activity, RNA polymerase II core promoter proximal region sequence-specific binding//DNA binding//oxaloacetate decarboxylase activity//transcription factor activity, sequence-specific DNA binding//protein binding//sodium ion transmembrane transporter activity//RNA polymerase II core promoter proximal region sequence-specific DNA binding	GO:0016020//GO:0005634//GO:0005667	membrane//nucleus//transcription factor complex	KOG3743	Recombination signal binding protein-J kappa(CBF1, Su(H), HS2NF5)
Cluster-25089.3	Homeobox	Cluster-25089.3	UP	4.8793	0.031458	1521	9728922	XP_018900081.1	1016	1.7e-107	PREDICTED: thyroid transcription factor 1-like [Bemisia tabaci]	XM_019044536.1	XM_019044536	1336	0	PREDICTED: Bemisia tabaci thyroid transcription factor 1-like (LOC109032418), mRNA	K09342	NKX2-1, TITF1	homeobox protein Nkx-2.1	http://www.genome.jp/dbget-bin/www_bget?ko:K09342	Q9H2Z4	437	8.6e-42	Homeobox protein Nkx-2.4 OS=Homo sapiens GN=NKX2-4 PE=3 SV=3	PF05920//PF00046	Homeobox KN domain//Homeobox domain	GO:0006355	regulation of transcription, DNA-templated	GO:0003677	DNA binding	--	--	KOG0842	Transcription factor tinman/NKX2-3, contains HOX domain
Cluster-35353.29234	Homeobox	Cluster-35353.29234	UP	1.3116	8.95e-05	4784	9722607	XP_018906301.1	6177	0	PREDICTED: inhibitor of Bruton tyrosine kinase isoform X1 [Bemisia tabaci]	XM_019050756.1	XM_019050756	4209	0	PREDICTED: Bemisia tabaci inhibitor of Bruton tyrosine kinase (LOC109036496), transcript variant X1, mRNA	--	--	--	--	Q9P2D0	1091	4e-117	Inhibitor of Bruton tyrosine kinase OS=Homo sapiens GN=IBTK PE=1 SV=3	--	--	--	--	--	--	--	--	KOG0783	Uncharacterized conserved protein, contains ankyrin and BTB/POZ domains
Cluster-35353.24037	zf-C2H2	Cluster-35353.24037	UP	1.9138	1.26e-14	4064	9734441	XP_018906222.1	3107	0	PREDICTED: heat shock factor protein isoform X3 [Bemisia tabaci]	XM_019050675.1	XM_019050675	1985	0	PREDICTED: Bemisia tabaci heat shock factor protein (LOC109036456), transcript variant X1, mRNA	K09414	HSF1	heat shock transcription factor 1	http://www.genome.jp/dbget-bin/www_bget?ko:K09414	P38529	665	8.4e-68	Heat shock factor protein 1 OS=Gallus gallus GN=HSF1 PE=2 SV=1	PF06005//PF17068//PF06546//PF02955//PF00447	Protein of unknown function (DUF904)//Required for respiratory growth protein 8 mitochondrial//Vertebrate heat shock transcription factor//Prokaryotic glutathione synthetase, ATP-grasp domain//HSF-type DNA-binding	GO:0000002//GO:0043093//GO:0000917//GO:0006750//GO:0006355	mitochondrial genome maintenance//FtsZ-dependent cytokinesis//barrier septum assembly//glutathione biosynthetic process//regulation of transcription, DNA-templated	GO:0003700//GO:0003677//GO:0004363//GO:0043565//GO:0005524	transcription factor activity, sequence-specific DNA binding//DNA binding//glutathione synthase activity//sequence-specific DNA binding//ATP binding	GO:0005737//GO:0005634//GO:0005667	cytoplasm//nucleus//transcription factor complex	KOG0627	Heat shock transcription factor
Cluster-35353.16237	Homeobox	Cluster-35353.16237	UP	3.7015	1.03e-17	5790	9722115	XP_018900959.1	3759	0	PREDICTED: mushroom body large-type Kenyon cell-specific protein 1 isoform X2 [Bemisia tabaci]	XM_019045423.1	XM_019045423	5042	0	PREDICTED: Bemisia tabaci mushroom body large-type Kenyon cell-specific protein 1 (LOC109033008), transcript variant X3, mRNA	--	--	--	--	Q95YM8	409	5.8e-38	Mushroom body large-type Kenyon cell-specific protein 1 OS=Apis mellifera GN=Mblk-1 PE=1 SV=1	PF05225	helix-turn-helix, Psq domain	--	--	GO:0003677	DNA binding	--	--	KOG4565	E93 protein involved in programmed cell death, putative transcription regulator
Cluster-35353.48122	zf-C2H2	Cluster-35353.48122	DOWN	-1.3561	1.12e-10	2210	9732270	XP_018903801.1	555	7.1e-54	PREDICTED: zinc finger protein 271-like isoform X1 [Bemisia tabaci]	XM_019048257.1	XM_019048257	593	0	PREDICTED: Bemisia tabaci gastrula zinc finger protein XlCGF57.1-like (LOC109034878), transcript variant X2, mRNA	--	--	--	--	Q96N38	383	2.3e-35	Zinc finger protein 714 OS=Homo sapiens GN=ZNF714 PE=2 SV=3	PF05495//PF00096//PF02100//PF00130//PF06467//PF01428//PF13465//PF04814//PF16622//PF05191//PF01283//PF02892//PF00412	CHY zinc finger//Zinc finger, C2H2 type//Ornithine decarboxylase antizyme//Phorbol esters/diacylglycerol binding domain (C1 domain)//MYM-type Zinc finger with FCS sequence motif//AN1-like Zinc finger//Zinc-finger double domain//Hepatocyte nuclear factor 1 (HNF-1), N terminus//zinc-finger C2H2-type//Adenylate kinase, active site lid//Ribosomal protein S26e//BED zinc finger//LIM domain	GO:0006144//GO:0045893//GO:0019467//GO:0006412//GO:0046034//GO:0035556//GO:0042254	purine nucleobase metabolic process//positive regulation of transcription, DNA-templated//ornithine catabolic process, by decarboxylation//translation//ATP metabolic process//intracellular signal transduction//ribosome biogenesis	GO:0004017//GO:0003677//GO:0004857//GO:0008073//GO:0003735//GO:0046872//GO:0008270	adenylate kinase activity//DNA binding//enzyme inhibitor activity//ornithine decarboxylase inhibitor activity//structural constituent of ribosome//metal ion binding//zinc ion binding	GO:0005634//GO:0005840//GO:0005622	nucleus//ribosome//intracellular	--	--
Cluster-35353.32106	Homeobox	Cluster-35353.32106	DOWN	-1.0372	3.35e-05	2139	9725008	XP_018895719.1	818	2.2e-84	PREDICTED: oocyte zinc finger protein XlCOF6-like [Bemisia tabaci]	XM_019053242.1	XM_019053242	1270	0	PREDICTED: Bemisia tabaci gastrula zinc finger protein XlCGF57.1-like (LOC109038242), transcript variant X3, mRNA	K09228	KRAB	KRAB domain-containing zinc finger protein	http://www.genome.jp/dbget-bin/www_bget?ko:K09228	Q86XN6	631	3.9e-64	Zinc finger protein 761 OS=Homo sapiens GN=ZNF761 PE=2 SV=2	PF06007//PF13912//PF16622//PF00096//PF13465//PF06467	Phosphonate metabolism protein PhnJ//C2H2-type zinc finger//zinc-finger C2H2-type//Zinc finger, C2H2 type//Zinc-finger double domain//MYM-type Zinc finger with FCS sequence motif	GO:0042916//GO:0019700	alkylphosphonate transport//organic phosphonate catabolic process	GO:0016829//GO:0046872//GO:0008270	lyase activity//metal ion binding//zinc ion binding	--	--	--	--
Cluster-35353.45711	Homeobox	Cluster-35353.45711	UP	1.3282	1.67e-19	5112	9728413	XP_018899509.1	4319	0	PREDICTED: uncharacterized protein DDB_G0284459-like isoform X3 [Bemisia tabaci]	XM_019043964.1	XM_019043964	3200	0	PREDICTED: Bemisia tabaci uncharacterized protein DDB_G0284459-like (LOC109032052), transcript variant X3, mRNA	--	--	--	--	Q9UIF8	136	2.3e-06	Bromodomain adjacent to zinc finger domain protein 2B OS=Homo sapiens GN=BAZ2B PE=1 SV=3	--	--	--	--	--	--	--	--	--	--
Cluster-35353.51935	zf-C2H2	Cluster-35353.51935	UP	2.7586	1.23e-05	2879	9737876	XP_018914769.1	3097	0	PREDICTED: nuclear factor 1 X-type isoform X4 [Bemisia tabaci]	XM_019059224.1	XM_019059224	2767	0	PREDICTED: Bemisia tabaci nuclear factor 1 X-type (LOC109042465), transcript variant X4, mRNA	K09172	NFIN	nuclear factor I, invertebrate	http://www.genome.jp/dbget-bin/www_bget?ko:K09172	Q90932	839	4e-88	Nuclear factor 1 X-type OS=Gallus gallus GN=NFIX PE=2 SV=1	--	--	--	--	--	--	--	--	KOG3663	Nuclear factor I
Cluster-35353.44863	zf-C2H2	Cluster-35353.44863	UP	1.0065	0.0090063	1958	9738862	XP_018915875.1	2067	2.9e-229	PREDICTED: protein gooseberry-like isoform X2 [Bemisia tabaci]	XM_019060330.1	XM_019060330	1761	0	PREDICTED: Bemisia tabaci protein gooseberry-like (LOC109043199), transcript variant X2, mRNA	K09381	PAX3_7	paired box protein 3/7	http://www.genome.jp/dbget-bin/www_bget?ko:K09381	P09082	876	1.4e-92	Protein gooseberry OS=Drosophila melanogaster GN=gsb PE=2 SV=1	PF05920//PF00046//PF01381//PF00292	Homeobox KN domain//Homeobox domain//Helix-turn-helix//'Paired box' domain	GO:0006355	regulation of transcription, DNA-templated	GO:0003677//GO:0043565	DNA binding//sequence-specific DNA binding	--	--	KOG0849	Transcription factor PRD and related proteins, contain PAX and HOX domains
Cluster-35353.13437	Homeobox	Cluster-35353.13437	UP	2.7428	3.36e-09	2632	9765911	XP_018911456.1	1140	1.2e-121	PREDICTED: POU domain, class 6, transcription factor 2 isoform X1 [Bemisia tabaci]	XM_019055911.1	XM_019055911	2429	0	PREDICTED: Bemisia tabaci POU domain, class 6, transcription factor 1 (LOC109040107), transcript variant X1, mRNA	K09368	POU6F	POU domain transcription factor, class 6	http://www.genome.jp/dbget-bin/www_bget?ko:K09368	Q8BJI4	665	5.4e-68	POU domain, class 6, transcription factor 2 OS=Mus musculus GN=Pou6f2 PE=2 SV=1	PF00046//PF15323//PF00157	Homeobox domain//Developmental protein//Pou domain - N-terminal to homeobox domain	GO:0048598//GO:0006355	embryonic morphogenesis//regulation of transcription, DNA-templated	GO:0003677//GO:0003700	DNA binding//transcription factor activity, sequence-specific DNA binding	GO:0072669//GO:0005667	tRNA-splicing ligase complex//transcription factor complex	KOG3802	Transcription factor OCT-1, contains POU and HOX domains
Cluster-35353.27055	ZBTB	Cluster-35353.27055	UP	2.2538	6.36e-27	2069	9739519	XP_018916600.1	1799	3.7e-198	PREDICTED: transcription factor HNF-4 homolog isoform X5 [Bemisia tabaci]	XM_019061055.1	XM_019061055	1654	0	PREDICTED: Bemisia tabaci transcription factor HNF-4 homolog (LOC109043751), transcript variant X7, mRNA	K07292	NR2A1, HNF4A	hepatocyte nuclear factor 4-alpha	http://www.genome.jp/dbget-bin/www_bget?ko:K07292	P49866	1184	2.8e-128	Transcription factor HNF-4 homolog OS=Drosophila melanogaster GN=Hnf4 PE=1 SV=3	PF00105//PF00104	Zinc finger, C4 type (two domains)//Ligand-binding domain of nuclear hormone receptor	GO:0043401//GO:0006355	steroid hormone mediated signaling pathway//regulation of transcription, DNA-templated	GO:0008270//GO:0003700//GO:0043565	zinc ion binding//transcription factor activity, sequence-specific DNA binding//sequence-specific DNA binding	GO:0005634//GO:0005667	nucleus//transcription factor complex	KOG4215	Hepatocyte nuclear factor 4 and similar steroid hormone receptors
Cluster-35353.23889	Homeobox	Cluster-35353.23889	UP	1.0087	0.016944	1890	9728286	XP_018899367.1	436	3.8e-40	PREDICTED: uncharacterized protein LOC109031959 [Bemisia tabaci]	JX618127.1	JX618127	287	3.2e-146	Gossypium hirsutum clone NBRI_GE63473 microsatellite sequence	--	--	--	--	--	--	--	--	--	--	--	--	--	--	--	--	--	--
Cluster-35353.41728	Homeobox	Cluster-35353.41728	UP	3.6293	4.52e-10	2286	9734331	XP_018906098.1	1872	1.4e-206	PREDICTED: steroid receptor seven-up, isoforms B..C [Bemisia tabaci]	XM_019050553.1	XM_019050553	1863	0	PREDICTED: Bemisia tabaci steroid receptor seven-up, isoforms B/C (LOC109036371), mRNA	K08547	NR2F1, TFCOUP1	COUP transcription factor 1	http://www.genome.jp/dbget-bin/www_bget?ko:K08547	P16375	1647	6.4e-182	Steroid receptor seven-up, isoforms B/C OS=Drosophila melanogaster GN=svp PE=2 SV=1	PF00105//PF00104	Zinc finger, C4 type (two domains)//Ligand-binding domain of nuclear hormone receptor	GO:0006355//GO:0043401	regulation of transcription, DNA-templated//steroid hormone mediated signaling pathway	GO:0003700//GO:0043565//GO:0008270	transcription factor activity, sequence-specific DNA binding//sequence-specific DNA binding//zinc ion binding	GO:0005634//GO:0005667	nucleus//transcription factor complex	--	--
Cluster-35353.14569	Homeobox	Cluster-35353.14569	UP	1.4823	0.000271	6092	9727585	XP_018898580.1	2930	0	PREDICTED: zinc finger protein 90 isoform X5 [Bemisia tabaci]	XM_019043035.1	XM_019043035	5240	0	PREDICTED: Bemisia tabaci zinc finger protein 90 (LOC109031498), transcript variant X5, mRNA	--	--	--	--	Q96NI8	362	1.7e-32	Zinc finger protein 570 OS=Homo sapiens GN=ZNF570 PE=2 SV=1	PF00286//PF13912//PF13465//PF01306//PF00096//PF01736//PF01372	Viral coat protein//C2H2-type zinc finger//Zinc-finger double domain//LacY proton/sugar symporter//Zinc finger, C2H2 type//Polyomavirus agnoprotein//Melittin	GO:0045859//GO:0006810	regulation of protein kinase activity//transport	GO:0046872//GO:0005198//GO:0003677//GO:0004860	metal ion binding//structural molecule activity//DNA binding//protein kinase inhibitor activity	GO:0019028//GO:0016020//GO:0005576	viral capsid//membrane//extracellular region	--	--
Cluster-35353.52195	ZBTB	Cluster-35353.52195	DOWN	-1.3989	2.55e-07	1284	1672079	NP_001157317.1	245	3.6e-18	longitudinals lacking isoform 8 [Tribolium castaneum]	XR_002009923.1	XR_002009923	367	0	PREDICTED: Bemisia tabaci uncharacterized LOC109041076 (LOC109041076), ncRNA	--	--	--	--	Q7KQZ4	171	5.1e-11	Longitudinals lacking protein, isoforms A/B/D/L OS=Drosophila melanogaster GN=lola PE=1 SV=1	--	--	--	--	--	--	--	--	--	--
Cluster-35353.19403	HTH	Cluster-35353.19403	DOWN	-1.4662	1.47e-06	3748	9735271	XP_018913114.1	1667	1.4e-182	PREDICTED: T-box-containing protein TBX6L-like [Bemisia tabaci]	XM_019057569.1	XM_019057569	2519	0	PREDICTED: Bemisia tabaci T-box-containing protein TBX6L-like (LOC109041278), mRNA	K10180	TBX6	T-box protein 6	http://www.genome.jp/dbget-bin/www_bget?ko:K10180	Q66JL1	557	2.6e-55	T-box transcription factor TBX6 OS=Xenopus tropicalis GN=tbx6 PE=2 SV=1	PF07127//PF00907	Late nodulin protein//T-box	GO:0009878//GO:0006355	nodule morphogenesis//regulation of transcription, DNA-templated	GO:0046872//GO:0003700	metal ion binding//transcription factor activity, sequence-specific DNA binding	GO:0005667//GO:0005634	transcription factor complex//nucleus	KOG3585	TBX2 and related T-box transcription factors
Cluster-35353.25060	zf-C2H2	Cluster-35353.25060	UP	1.7625	2.87e-06	5506	5526806	XP_011860347.1	864	2.6e-89	PREDICTED: zinc finger BED domain-containing protein 4-like [Vollenhovia emeryi]	XM_019054026.1	XM_019054026	67	1.87e-23	PREDICTED: Bemisia tabaci UDP-N-acetylglucosamine transporter (LOC109038821), transcript variant X6, mRNA	--	--	--	--	O96006	278	8.6e-23	Zinc finger BED domain-containing protein 1 OS=Homo sapiens GN=ZBED1 PE=1 SV=1	PF14372//PF05699//PF02892	Domain of unknown function (DUF4413)//hAT family C-terminal dimerisation region//BED zinc finger	--	--	GO:0046983//GO:0003677	protein dimerization activity//DNA binding	--	--	KOG1121	Tam3-transposase (Ac family)
Cluster-35353.48571	zf-C2H2	Cluster-35353.48571	DOWN	-1.1437	9.58e-06	1670	9734976	XP_018912786.1	552	1.2e-53	PREDICTED: longitudinals lacking protein-like [Bemisia tabaci]	XM_019057241.1	XM_019057241	305	2.78e-156	PREDICTED: Bemisia tabaci longitudinals lacking protein-like (LOC109041075), mRNA	--	--	--	--	P42283	140	2.6e-07	Longitudinals lacking protein, isoform G OS=Drosophila melanogaster GN=lola PE=1 SV=2	PF03540//PF16622//PF00096	Transcription initiation factor TFIID 23-30kDa subunit//zinc-finger C2H2-type//Zinc finger, C2H2 type	GO:0006352	DNA-templated transcription, initiation	GO:0046872	metal ion binding	GO:0005634	nucleus	--	--
Cluster-35353.1813	MBD	Cluster-35353.1813	UP	1.0954	0.028791	2876	9722162	XP_018901437.1	1391	1.1e-150	PREDICTED: gastrula zinc finger protein XlCGF57.1-like [Bemisia tabaci]	XM_019045892.1	XM_019045892	466	0	PREDICTED: Bemisia tabaci gastrula zinc finger protein XlCGF57.1-like (LOC109033318), transcript variant X1, mRNA	--	--	--	--	Q6IV72	678	1.8e-69	Zinc finger protein 425 OS=Homo sapiens GN=ZNF425 PE=1 SV=1	PF00096//PF13465	Zinc finger, C2H2 type//Zinc-finger double domain	--	--	GO:0046872	metal ion binding	--	--	--	--
Cluster-35353.58192	THAP	Cluster-35353.58192	UP	3.0482	6.95e-05	3101	9737308	XP_018914130.1	2274	4.6e-253	PREDICTED: optomotor-blind protein isoform X1 [Bemisia tabaci]	XM_019058585.1	XM_019058585	2800	0	PREDICTED: Bemisia tabaci optomotor-blind protein (LOC109042035), transcript variant X1, mRNA	K10176	TBX2	T-box protein 2	http://www.genome.jp/dbget-bin/www_bget?ko:K10176	Q24432	1157	5.7e-125	Optomotor-blind protein OS=Drosophila melanogaster GN=bi PE=1 SV=3	PF05399//PF01141//PF03558//PF00907	Ectropic viral integration site 2A protein (EVI2A)//Gag polyprotein, inner coat protein p12//TBSV core protein P21/P22//T-box	GO:0006355	regulation of transcription, DNA-templated	GO:0003700	transcription factor activity, sequence-specific DNA binding	GO:0005667//GO:0005634//GO:0016021//GO:0019028	transcription factor complex//nucleus//integral component of membrane//viral capsid	KOG3585	TBX2 and related T-box transcription factors
Cluster-35353.21853	RXR-like	Cluster-35353.21853	UP	1.3247	0.00091927	896	9737948	XP_018914850.1	945	1.7e-99	PREDICTED: aryl hydrocarbon receptor nuclear translocator homolog isoform X2 [Bemisia tabaci]	XM_019059305.1	XM_019059305	880	0	PREDICTED: Bemisia tabaci aryl hydrocarbon receptor nuclear translocator homolog (LOC109042514), transcript variant X2, mRNA	K09097	ARNT	aryl hydrocarbon receptor nuclear translocator	http://www.genome.jp/dbget-bin/www_bget?ko:K09097	O15945	798	7e-84	Aryl hydrocarbon receptor nuclear translocator homolog OS=Drosophila melanogaster GN=tgo PE=1 SV=3	PF00989//PF00010//PF08447	PAS fold//Helix-loop-helix DNA-binding domain//PAS fold	GO:0006355	regulation of transcription, DNA-templated	GO:0005515//GO:0046983	protein binding//protein dimerization activity	--	--	KOG3561	Aryl-hydrocarbon receptor nuclear translocator
Cluster-35353.33752	zf-C2H2	Cluster-35353.33752	UP	2.835	1.26e-07	1580	9721522	XP_018917251.1	772	3.5e-79	PREDICTED: enhancer of split mbeta protein-like [Bemisia tabaci]	XM_019061706.1	XM_019061706	906	0	PREDICTED: Bemisia tabaci enhancer of split mbeta protein-like (LOC109044145), mRNA	K06054	HES1	hairy and enhancer of split 1	http://www.genome.jp/dbget-bin/www_bget?ko:K06054	Q01069	276	4.2e-23	Enhancer of split mbeta protein OS=Drosophila melanogaster GN=HLHmbeta PE=2 SV=2	PF00010//PF07527	Helix-loop-helix DNA-binding domain//Hairy Orange	GO:0006355	regulation of transcription, DNA-templated	GO:0046983//GO:0003677	protein dimerization activity//DNA binding	--	--	--	--
Cluster-35353.36054	zf-C2H2	Cluster-35353.36054	UP	1.3129	1.9e-18	2320	9730193	XP_018901495.1	1340	7e-145	PREDICTED: activating transcription factor of chaperone isoform X2 [Bemisia tabaci]	XM_019045950.1	XM_019045950	1510	0	PREDICTED: Bemisia tabaci activating transcription factor of chaperone (LOC109033366), transcript variant X2, mRNA	--	--	--	--	Q9GPH3	159	2.3e-09	Activating transcription factor of chaperone OS=Bombyx mori GN=ATFC PE=2 SV=1	PF03131//PF00170//PF07716	bZIP Maf transcription factor//bZIP transcription factor//Basic region leucine zipper	GO:0006355	regulation of transcription, DNA-templated	GO:0043565//GO:0003700//GO:0003677	sequence-specific DNA binding//transcription factor activity, sequence-specific DNA binding//DNA binding	GO:0005667//GO:0005634	transcription factor complex//nucleus	--	--
Cluster-35353.47946	zf-C2H2	Cluster-35353.47946	UP	1.3207	0.0058723	3406	9722390	XP_018903931.1	2243	2e-249	PREDICTED: zinc finger protein 585A-like isoform X1 [Bemisia tabaci]	XM_019048386.1	XM_019048386	2990	0	PREDICTED: Bemisia tabaci zinc finger protein 585A-like (LOC109034951), transcript variant X1, mRNA	K09228	KRAB	KRAB domain-containing zinc finger protein	http://www.genome.jp/dbget-bin/www_bget?ko:K09228	D3ZUU2	288	3.7e-24	GDNF-inducible zinc finger protein 1 OS=Rattus norvegicus GN=Gzf1 PE=3 SV=1	PF16622//PF13465//PF13912//PF02150//PF00096//PF06467	zinc-finger C2H2-type//Zinc-finger double domain//C2H2-type zinc finger//RNA polymerases M/15 Kd subunit//Zinc finger, C2H2 type//MYM-type Zinc finger with FCS sequence motif	GO:0006144//GO:0006206//GO:0006351	purine nucleobase metabolic process//pyrimidine nucleobase metabolic process//transcription, DNA-templated	GO:0046872//GO:0003677//GO:0003899//GO:0008270	metal ion binding//DNA binding//DNA-directed RNA polymerase activity//zinc ion binding	GO:0005730	nucleolus	--	--
Cluster-35353.18887	zf-C2H2	Cluster-35353.18887	DOWN	-1.1789	0.0014111	879	11562387	XP_023032393.1	174	4.2e-10	uncharacterized protein LOC6644341 [Drosophila willistoni]	XM_019045050.1	XM_019045050	170	1.6e-81	PREDICTED: Bemisia tabaci uncharacterized protein C11orf70-like (LOC109032765), mRNA	--	--	--	--	Q8CHW1	198	2.6e-14	THAP domain-containing protein 1 OS=Mus musculus GN=Thap1 PE=2 SV=1	PF05485	THAP domain	--	--	GO:0003676	nucleic acid binding	--	--	--	--
Cluster-35353.34294	T-box	Cluster-35353.34294	UP	2.9076	4.79e-87	2413	9766250	XP_018911832.1	2009	1.9e-222	PREDICTED: uncharacterized protein LOC109040365 isoform X1 [Bemisia tabaci]	XM_019056288.1	XM_019056288	2279	0	PREDICTED: Bemisia tabaci uncharacterized LOC109040365 (LOC109040365), transcript variant X2, mRNA	--	--	--	--	--	--	--	--	PF02895//PF00170//PF07716	Signal transducing histidine kinase, homodimeric domain//bZIP transcription factor//Basic region leucine zipper	GO:0000160//GO:0006355//GO:0016310//GO:0006935	phosphorelay signal transduction system//regulation of transcription, DNA-templated//phosphorylation//chemotaxis	GO:0043565//GO:0004673//GO:0000155//GO:0003700	sequence-specific DNA binding//protein histidine kinase activity//phosphorelay sensor kinase activity//transcription factor activity, sequence-specific DNA binding	GO:0005667//GO:0005737//GO:0009365	transcription factor complex//cytoplasm//protein histidine kinase complex	KOG3119	Basic region leucine zipper transcription factor
Cluster-35353.18712	bHLH	Cluster-35353.18712	UP	1.4481	3.7e-19	5443	9733519	XP_018905189.1	1621	4.3e-177	PREDICTED: cyclic AMP response element-binding protein A-like [Bemisia tabaci]	XM_019049644.1	XM_019049644	1740	0	PREDICTED: Bemisia tabaci cyclic AMP response element-binding protein A-like (LOC109035839), mRNA	K09048	CREB3	cyclic AMP-responsive element-binding protein 3	http://www.genome.jp/dbget-bin/www_bget?ko:K09048	P29747	437	3.1e-41	Cyclic AMP response element-binding protein A OS=Drosophila melanogaster GN=CrebA PE=1 SV=2	PF07926//PF03131//PF04111//PF00170//PF07716	TPR/MLP1/MLP2-like protein//bZIP Maf transcription factor//Autophagy protein Apg6//bZIP transcription factor//Basic region leucine zipper	GO:0006914//GO:0006355//GO:0006606	autophagy//regulation of transcription, DNA-templated//protein import into nucleus	GO:0003677//GO:0043565//GO:0003700	DNA binding//sequence-specific DNA binding//transcription factor activity, sequence-specific DNA binding	GO:0005667//GO:0005634	transcription factor complex//nucleus	KOG0709	CREB/ATF family transcription factor
Cluster-35353.28518	bHLH	Cluster-35353.28518	UP	2.6454	2.15e-26	2269	9736968	XP_018913751.1	1501	1.5e-163	PREDICTED: uncharacterized protein LOC109041784 [Bemisia tabaci]	XM_019058206.1	XM_019058206	1402	0	PREDICTED: Bemisia tabaci uncharacterized LOC109041784 (LOC109041784), mRNA	K09036	MAFB	transcription factor MAFB	http://www.genome.jp/dbget-bin/www_bget?ko:K09036	Q6DE84	199	5.1e-14	Transcription factor MafB OS=Xenopus laevis GN=mafb PE=2 SV=1	PF03131//PF00170//PF05478	bZIP Maf transcription factor//bZIP transcription factor//Prominin	GO:0006355	regulation of transcription, DNA-templated	GO:0003677//GO:0003700//GO:0043565	DNA binding//transcription factor activity, sequence-specific DNA binding//sequence-specific DNA binding	GO:0016021//GO:0005634//GO:0005667	integral component of membrane//nucleus//transcription factor complex	KOG4196	bZIP transcription factor MafK
Cluster-35353.49726	TF_bZIP	Cluster-35353.49726	UP	1.169	0.012533	1737	1074728	XP_001865543.1	235	7.1e-17	lola [Culex quinquefasciatus]	XM_019052191.1	XM_019052191	133	1.19e-60	PREDICTED: Bemisia tabaci uncharacterized LOC109037485 (LOC109037485), mRNA	K09228	KRAB	KRAB domain-containing zinc finger protein	http://www.genome.jp/dbget-bin/www_bget?ko:K09228	P52746	160	1.3e-09	Zinc finger protein 142 OS=Homo sapiens GN=ZNF142 PE=2 SV=4	PF08804//PF07975//PF13465//PF01155//PF00096	gp32 DNA binding protein like//TFIIH C1-like domain//Zinc-finger double domain//Hydrogenase/urease nickel incorporation, metallochaperone, hypA//Zinc finger, C2H2 type	GO:0006464//GO:0006281	cellular protein modification process//DNA repair	GO:0008270//GO:0003697//GO:0046872//GO:0016151	zinc ion binding//single-stranded DNA binding//metal ion binding//nickel cation binding	--	--	KOG1721	FOG: Zn-finger
Cluster-35353.56096	zf-C2H2	Cluster-35353.56096	UP	1.9541	9.28e-16	3654	9737927	XP_018914826.1	1635	6.8e-179	PREDICTED: uncharacterized protein LOC109042498 [Bemisia tabaci]	XM_019059281.1	XM_019059281	2849	0	PREDICTED: Bemisia tabaci uncharacterized LOC109042498 (LOC109042498), mRNA	--	--	--	--	Q68EL6	237	3.2e-18	Nuclear factor interleukin-3-regulated protein OS=Danio rerio GN=nfil3 PE=2 SV=1	PF07716//PF00170	Basic region leucine zipper//bZIP transcription factor	GO:0006355	regulation of transcription, DNA-templated	GO:0003700//GO:0043565	transcription factor activity, sequence-specific DNA binding//sequence-specific DNA binding	GO:0005667	transcription factor complex	KOG3119	Basic region leucine zipper transcription factor
Cluster-35353.17854	THAP	Cluster-35353.17854	UP	1.3732	0.00033403	2665	9722809	XP_018908499.1	2449	2e-273	PREDICTED: uncharacterized protein LOC109038028 isoform X1 [Bemisia tabaci]	XM_019052954.1	XM_019052954	1372	0	PREDICTED: Bemisia tabaci zinc finger E-box-binding homeobox 1-like (LOC109038028), transcript variant X2, mRNA	--	--	--	--	--	--	--	--	PF16622//PF00096	zinc-finger C2H2-type//Zinc finger, C2H2 type	--	--	GO:0046872	metal ion binding	--	--	--	--
Cluster-35353.54127	TF_bZIP	Cluster-35353.54127	UP	1.2607	0.0030182	5285	9724207	XP_018917543.1	6409	0	PREDICTED: ankyrin repeat and BTB..POZ domain-containing protein 2 [Bemisia tabaci]	XM_019061998.1	XM_019061998	4499	0	PREDICTED: Bemisia tabaci ankyrin repeat and BTB/POZ domain-containing protein 2 (LOC109044326), mRNA	K10521	ABTB2	ankyrin repeat and BTB/POZ domain-containing protein 2	http://www.genome.jp/dbget-bin/www_bget?ko:K10521	Q7TQI7	1671	2.4e-184	Ankyrin repeat and BTB/POZ domain-containing protein 2 OS=Mus musculus GN=Abtb2 PE=2 SV=1	PF13606//PF00651//PF15108//PF00023//PF04564//PF01466	Ankyrin repeat//BTB/POZ domain//Voltage-dependent calcium channel gamma-like subunit protein family//Ankyrin repeat//U-box domain//Skp1 family, dimerisation domain	GO:0016567//GO:0006511//GO:0006811//GO:0006816	protein ubiquitination//ubiquitin-dependent protein catabolic process//ion transport//calcium ion transport	GO:0005262//GO:0004842//GO:0005244//GO:0005515	calcium channel activity//ubiquitin-protein transferase activity//voltage-gated ion channel activity//protein binding	GO:0016021	integral component of membrane	--	--
Cluster-35353.28237	TF_bZIP	Cluster-35353.28237	UP	2.3318	5.56e-06	2529	9722758	XP_018907981.1	981	3.2e-103	PREDICTED: homeobox protein engrailed-1a-like [Bemisia tabaci]	XM_019052436.1	XM_019052436	1210	0	PREDICTED: Bemisia tabaci homeobox protein engrailed-1a-like (LOC109037663), mRNA	K09319	EN	homeobox protein engrailed	http://www.genome.jp/dbget-bin/www_bget?ko:K09319	P02836	408	3.3e-38	Segmentation polarity homeobox protein engrailed OS=Drosophila melanogaster GN=en PE=1 SV=2	PF00046//PF05920	Homeobox domain//Homeobox KN domain	GO:0006355	regulation of transcription, DNA-templated	GO:0003677	DNA binding	--	--	KOG0489	Transcription factor zerknullt and related HOX domain proteins
Cluster-35353.24372	TF_bZIP	Cluster-35353.24372	UP	1.3546	2.76e-07	1432	9733154	XP_018904782.1	1211	3.9e-130	PREDICTED: transcription factor AP-1 [Bemisia tabaci]	XM_019049237.1	XM_019049237	1359	0	PREDICTED: Bemisia tabaci transcription factor AP-1 (LOC109035563), mRNA	K04448	JUN	transcription factor AP-1	http://www.genome.jp/dbget-bin/www_bget?ko:K04448	P18289	331	1.6e-29	Transcription factor AP-1 OS=Drosophila melanogaster GN=Jra PE=1 SV=2	--	--	--	--	--	--	--	--	KOG1414	Transcriptional activator FOSB/c-Fos and related bZIP transcription factors
Cluster-35353.14428	zf-C2H2	Cluster-35353.14428	UP	1.0019	0.016059	6174	9725094	XP_018895816.1	1604	4.5e-175	PREDICTED: T-box transcription factor TBX20-like [Bemisia tabaci]	XM_019040271.1	XM_019040271	4442	0	PREDICTED: Bemisia tabaci T-box transcription factor TBX20-like (LOC109029690), mRNA	K10185	TBX20	T-box protein 20	http://www.genome.jp/dbget-bin/www_bget?ko:K10185	Q94890	909	6.5e-96	T-box protein H15 OS=Drosophila melanogaster GN=H15 PE=2 SV=2	PF00907	T-box	GO:0006355	regulation of transcription, DNA-templated	GO:0003700	transcription factor activity, sequence-specific DNA binding	GO:0005634//GO:0005667	nucleus//transcription factor complex	KOG3586	TBX1 and related T-box transcription factors
Cluster-35353.42201	TF_bZIP	Cluster-35353.42201	UP	1.2533	0.0095317	2517	9739926	XP_018908104.1	3326	0	PREDICTED: uncharacterized protein LOC109037746 [Bemisia tabaci]	XM_019052561.1	XM_019052561	1891	0	PREDICTED: Bemisia tabaci uncharacterized LOC109037746 (LOC109037746), transcript variant X2, mRNA	--	--	--	--	--	--	--	--	PF05485	THAP domain	--	--	GO:0003676	nucleic acid binding	--	--	--	--
Cluster-35353.55177	zf-C2H2	Cluster-35353.55177	UP	3.5846	3.87e-14	2676	9723536	XP_018915971.1	1914	2.2e-211	PREDICTED: activating transcription factor 3 [Bemisia tabaci]	XM_019060426.1	XM_019060426	2484	0	PREDICTED: Bemisia tabaci activating transcription factor 3 (LOC109043279), mRNA	K09033	JDP2	jun dimerization protein 2	http://www.genome.jp/dbget-bin/www_bget?ko:K09033	Q6DGM8	163	9e-10	Jun dimerization protein 2 OS=Danio rerio GN=jdp2 PE=2 SV=1	PF03131//PF04977//PF07716//PF04111//PF00170//PF07989	bZIP Maf transcription factor//Septum formation initiator//Basic region leucine zipper//Autophagy protein Apg6//bZIP transcription factor//Centrosomin N-terminal motif 1	GO:0007049//GO:0006914//GO:0006355	cell cycle//autophagy//regulation of transcription, DNA-templated	GO:0003677//GO:0043565//GO:0003700	DNA binding//sequence-specific DNA binding//transcription factor activity, sequence-specific DNA binding	GO:0005667//GO:0005634//GO:0005815	transcription factor complex//nucleus//microtubule organizing center	--	--
Cluster-35353.25795	ZBTB	Cluster-35353.25795	UP	1.5956	0.0053947	901	9766977	XP_018912641.1	636	1.2e-63	PREDICTED: uncharacterized protein LOC109040953 [Bemisia tabaci]	XM_019057096.1	XM_019057096	397	0	PREDICTED: Bemisia tabaci uncharacterized LOC109040953 (LOC109040953), mRNA	--	--	--	--	Q28EM1	164	2.3e-10	Forkhead box protein J2 OS=Xenopus tropicalis GN=foxj2 PE=2 SV=1	PF00250	Forkhead domain	GO:0006355	regulation of transcription, DNA-templated	GO:0003700//GO:0043565	transcription factor activity, sequence-specific DNA binding//sequence-specific DNA binding	GO:0005667	transcription factor complex	KOG2294	Transcription factor of the Forkhead/HNF3 family
Cluster-35353.39760	Homeobox	Cluster-35353.39760	DOWN	-1.2784	2e-05	975	9020223	XP_017783508.1	214	1.1e-14	PREDICTED: longitudinals lacking protein, isoforms A..B..D..L-like isoform X7 [Nicrophorus vespilloides]	XM_019051659.1	XM_019051659	73	1.48e-27	PREDICTED: Bemisia tabaci longitudinals lacking protein, isoforms H/M/V-like (LOC109037149), transcript variant X4, mRNA	--	--	--	--	--	--	--	--	PF00096//PF01155//PF13912//PF13465//PF16622	Zinc finger, C2H2 type//Hydrogenase/urease nickel incorporation, metallochaperone, hypA//C2H2-type zinc finger//Zinc-finger double domain//zinc-finger C2H2-type	GO:0006464	cellular protein modification process	GO:0016151//GO:0046872	nickel cation binding//metal ion binding	--	--	--	--
Cluster-35353.39145	TF_bZIP	Cluster-35353.39145	UP	1.7162	0.00046963	5650	10830654	XP_022185146.1	277	3.1e-21	LOW QUALITY PROTEIN: zinc finger protein 26-like [Nilaparvata lugens]	XM_015666482.1	XM_015666482	84	6.8e-33	PREDICTED: Neodiprion lecontei homeotic protein spalt-major-like (LOC107225879), mRNA	--	--	--	--	P39770	573	5.4e-57	Homeotic protein spalt-major OS=Drosophila melanogaster GN=salm PE=1 SV=3	PF13465//PF16622//PF00130//PF00096//PF02150//PF13912//PF01907	Zinc-finger double domain//zinc-finger C2H2-type//Phorbol esters/diacylglycerol binding domain (C1 domain)//Zinc finger, C2H2 type//RNA polymerases M/15 Kd subunit//C2H2-type zinc finger//Ribosomal protein L37e	GO:0006144//GO:0006206//GO:0006351//GO:0035556//GO:0042254//GO:0006412	purine nucleobase metabolic process//pyrimidine nucleobase metabolic process//transcription, DNA-templated//intracellular signal transduction//ribosome biogenesis//translation	GO:0046872//GO:0003677//GO:0003735//GO:0003899	metal ion binding//DNA binding//structural constituent of ribosome//DNA-directed RNA polymerase activity	GO:0005622//GO:0005840//GO:0005730	intracellular//ribosome//nucleolus	--	--
Cluster-35353.46742	T-box	Cluster-35353.46742	UP	1.5531	4.14e-07	2316	9731895	XP_018903387.1	1362	2e-147	PREDICTED: stress response protein NST1-like isoform X1 [Bemisia tabaci]	XM_019047842.1	XM_019047842	1454	0	PREDICTED: Bemisia tabaci stress response protein NST1-like (LOC109034601), transcript variant X1, mRNA	--	--	--	--	--	--	--	--	--	--	--	--	--	--	--	--	--	--
Cluster-35353.33064	THAP	Cluster-35353.33064	UP	1.7046	8.12e-33	6734	9736316	XP_018907602.1	3907	0	PREDICTED: ecdysone-inducible protein E75 isoform X2 [Bemisia tabaci]	XM_019052057.1	XM_019052057	6415	0	PREDICTED: Bemisia tabaci nuclear hormone receptor E75 (LOC109037406), transcript variant X2, mRNA	--	--	--	--	O77245	1506	4.2e-165	Nuclear hormone receptor E75 OS=Metapenaeus ensis GN=E75 PE=2 SV=1	PF00104//PF00105	Ligand-binding domain of nuclear hormone receptor//Zinc finger, C4 type (two domains)	GO:0006355//GO:0043401	regulation of transcription, DNA-templated//steroid hormone mediated signaling pathway	GO:0008270//GO:0043565//GO:0003700	zinc ion binding//sequence-specific DNA binding//transcription factor activity, sequence-specific DNA binding	GO:0005667//GO:0005634	transcription factor complex//nucleus	--	--
Cluster-35353.17072	TF_bZIP	Cluster-35353.17072	UP	1.8015	0.012049	1700	9737569	XP_018914424.1	2143	3.9e-238	PREDICTED: ecdysone-induced protein 78C isoform X2 [Bemisia tabaci]	XM_019058879.1	XM_019058879	1651	0	PREDICTED: Bemisia tabaci ecdysone-induced protein 78C (LOC109042231), transcript variant X2, mRNA	K08701	NR1D3	nuclear receptor subfamily 1 group D member 3	http://www.genome.jp/dbget-bin/www_bget?ko:K08701	P45447	789	1.5e-82	Ecdysone-induced protein 78C OS=Drosophila melanogaster GN=Eip78C PE=2 SV=4	PF00105//PF00104	Zinc finger, C4 type (two domains)//Ligand-binding domain of nuclear hormone receptor	GO:0006355//GO:0043401	regulation of transcription, DNA-templated//steroid hormone mediated signaling pathway	GO:0008270//GO:0043565//GO:0003700	zinc ion binding//sequence-specific DNA binding//transcription factor activity, sequence-specific DNA binding	GO:0005667//GO:0005634	transcription factor complex//nucleus	--	--
Cluster-35353.18771	Fork head	Cluster-35353.18771	UP	2.2635	0.00056014	4230	9737708	XP_018914579.1	1010	2.3e-106	PREDICTED: uncharacterized protein LOC109042346 [Bemisia tabaci]	XM_019052883.1	XM_019052883	44	8.75e-11	PREDICTED: Bemisia tabaci angiogenic factor with G patch and FHA domains 1 (LOC109037984), transcript variant X2, mRNA	--	--	--	--	Q9D305	137	1.5e-06	THAP domain-containing protein 2 OS=Mus musculus GN=Thap2 PE=2 SV=1	PF05485	THAP domain	--	--	GO:0003676	nucleic acid binding	--	--	--	--
Cluster-35353.53248	zf-C2H2	Cluster-35353.53248	DOWN	-1.0235	8.67e-05	3323	9725180	XP_018895912.1	2043	3e-226	PREDICTED: protein king tubby [Bemisia tabaci]	XM_019040367.1	XM_019040367	2378	0	PREDICTED: Bemisia tabaci protein king tubby (LOC109029752), mRNA	--	--	--	--	Q16IR1	1089	4.7e-117	Protein king tubby 2 OS=Aedes aegypti GN=king-tubby2 PE=3 SV=1	--	--	--	--	--	--	--	--	KOG2502	Tub family proteins
Cluster-35353.51248	zf-C2H2	Cluster-35353.51248	UP	1.1299	3.66e-08	2497	9729871	XP_018901133.1	3105	0	PREDICTED: kelch-like protein diablo [Bemisia tabaci]	XM_019045588.1	XM_019045588	2336	0	PREDICTED: Bemisia tabaci kelch-like protein diablo (LOC109033135), mRNA	K10457	KLHL20, KLEIP	kelch-like protein 20	http://www.genome.jp/dbget-bin/www_bget?ko:K10457	Q16RL8	2807	0	Kelch-like protein diablo OS=Aedes aegypti GN=dbo PE=3 SV=1	PF01344//PF00651//PF07646	Kelch motif//BTB/POZ domain//Kelch motif	--	--	GO:0005515	protein binding	--	--	KOG4441	Proteins containing BTB/POZ and Kelch domains, involved in regulatory/signal transduction processes
Cluster-35353.16751	THAP	Cluster-35353.16751	UP	1.103	0.00028385	3997	9764285	XP_018909631.1	2676	1.5e-299	PREDICTED: protein abrupt-like isoform X1 [Bemisia tabaci]	XM_019054085.1	XM_019054085	3793	0	PREDICTED: Bemisia tabaci protein abrupt-like (LOC109038862), transcript variant X1, mRNA	--	--	--	--	Q24174	693	4.7e-71	Protein abrupt OS=Drosophila melanogaster GN=ab PE=1 SV=2	PF13912//PF00096//PF00651//PF02892	C2H2-type zinc finger//Zinc finger, C2H2 type//BTB/POZ domain//BED zinc finger	--	--	GO:0003677//GO:0005515//GO:0046872	DNA binding//protein binding//metal ion binding	--	--	--	--
Cluster-35353.53930	THR-like	Cluster-35353.53930	UP	1.0122	0.00048983	1492	9750453	XP_018908723.1	2197	1.9e-244	PREDICTED: BTB..POZ domain-containing protein 17 [Bemisia tabaci]	XM_019053178.1	XM_019053178	1405	0	PREDICTED: Bemisia tabaci BTB/POZ domain-containing protein 17 (LOC109038197), mRNA	--	--	--	--	Q6GLJ1	372	2.9e-34	BTB/POZ domain-containing protein 17 OS=Xenopus laevis GN=btbd17 PE=2 SV=2	--	--	--	--	--	--	--	--	KOG2075	Topoisomerase TOP1-interacting protein BTBD1
Cluster-35353.13119	THR-like	Cluster-35353.13119	UP	5.9414	1.2e-11	2853	9721397	XP_018906668.1	1953	7.1e-216	PREDICTED: BTB..POZ domain-containing protein 2 [Bemisia tabaci]	XM_019051123.1	XM_019051123	2477	0	PREDICTED: Bemisia tabaci BTB/POZ domain-containing protein 2 (LOC109036726), mRNA	K10477	BTBD1_2	BTB/POZ domain-containing protein 1/2	http://www.genome.jp/dbget-bin/www_bget?ko:K10477	Q9BX70	171	1.1e-10	BTB/POZ domain-containing protein 2 OS=Homo sapiens GN=BTBD2 PE=1 SV=1	PF00651	BTB/POZ domain	--	--	GO:0005515	protein binding	--	--	KOG2075	Topoisomerase TOP1-interacting protein BTBD1
Cluster-35353.30540	THAP	Cluster-35353.30540	DOWN	-1.5581	3.42e-07	1312	9739075	XP_018916108.1	388	9.7e-35	PREDICTED: gastrula zinc finger protein XlCGF57.1-like [Bemisia tabaci]	XM_019060563.1	XM_019060563	201	1.41e-98	PREDICTED: Bemisia tabaci gastrula zinc finger protein XlCGF57.1-like (LOC109043373), mRNA	--	--	--	--	--	--	--	--	PF03552//PF16622//PF00096//PF13465//PF13912//PF02892	Cellulose synthase//zinc-finger C2H2-type//Zinc finger, C2H2 type//Zinc-finger double domain//C2H2-type zinc finger//BED zinc finger	GO:0005982//GO:0030244//GO:0006011//GO:0005985	starch metabolic process//cellulose biosynthetic process//UDP-glucose metabolic process//sucrose metabolic process	GO:0046872//GO:0003677//GO:0016760	metal ion binding//DNA binding//cellulose synthase (UDP-forming) activity	GO:0016020	membrane	KOG1721	FOG: Zn-finger
Cluster-35353.15999	ZBTB	Cluster-35353.15999	UP	1.3665	0.0017622	3915	11124828	XP_022309566.1	286	1.9e-22	zinc finger protein 665-like [Crassostrea virginica]	XM_019060095.1	XM_019060095	973	0	PREDICTED: Bemisia tabaci zinc finger and BTB domain-containing protein 49-like (LOC109043064), mRNA	--	--	--	--	B4DU55	269	6.7e-22	Zinc finger protein 879 OS=Homo sapiens GN=ZNF879 PE=2 SV=2	PF02892//PF00096//PF06467//PF15313//PF13465//PF13912//PF06689//PF01428//PF16622//PF00651	BED zinc finger//Zinc finger, C2H2 type//MYM-type Zinc finger with FCS sequence motif//Hexamethylene bis-acetamide-inducible protein//Zinc-finger double domain//C2H2-type zinc finger//ClpX C4-type zinc finger//AN1-like Zinc finger//zinc-finger C2H2-type//BTB/POZ domain	GO:0007050//GO:0000122//GO:0045859	cell cycle arrest//negative regulation of transcription from RNA polymerase II promoter//regulation of protein kinase activity	GO:0008270//GO:0005515//GO:0004861//GO:0046983//GO:0017069//GO:0046872//GO:0003677	zinc ion binding//protein binding//cyclin-dependent protein serine/threonine kinase inhibitor activity//protein dimerization activity//snRNA binding//metal ion binding//DNA binding	GO:0005737//GO:0005634	cytoplasm//nucleus	--	--
Cluster-35353.49012	ZBTB	Cluster-35353.49012	DOWN	-1.4108	3.26e-06	1285	9735955	XP_018907199.1	682	7.7e-69	PREDICTED: gastrula zinc finger protein XlCGF26.1-like [Bemisia tabaci]	XM_019051654.1	XM_019051654	357	0	PREDICTED: Bemisia tabaci gastrula zinc finger protein XlCGF26.1-like (LOC109037147), mRNA	--	--	--	--	P08045	200	2.2e-14	Zinc finger protein Xfin OS=Xenopus laevis PE=1 SV=1	PF16622//PF13465//PF13912//PF01428//PF15750//PF00096//PF07648	zinc-finger C2H2-type//Zinc-finger double domain//C2H2-type zinc finger//AN1-like Zinc finger//Ubiquitin-binding zinc-finger//Zinc finger, C2H2 type//Kazal-type serine protease inhibitor domain	--	--	GO:0046872//GO:0005515//GO:0008270//GO:0043130	metal ion binding//protein binding//zinc ion binding//ubiquitin binding	--	--	--	--
Cluster-35353.61424	ZBTB	Cluster-35353.61424	UP	1.2255	0.032909	2464	9766865	XP_018912515.1	2204	4.8e-245	PREDICTED: protein gooseberry-neuro-like isoform X1 [Bemisia tabaci]	XM_019056970.1	XM_019056970	1869	0	PREDICTED: Bemisia tabaci paired box protein Pax-7-like (LOC109040873), transcript variant X1, mRNA	K09381	PAX3_7	paired box protein 3/7	http://www.genome.jp/dbget-bin/www_bget?ko:K09381	P47239	906	5.8e-96	Paired box protein Pax-7 OS=Mus musculus GN=Pax7 PE=1 SV=2	PF05920//PF00046//PF00292	Homeobox KN domain//Homeobox domain//'Paired box' domain	GO:0006355	regulation of transcription, DNA-templated	GO:0003677	DNA binding	--	--	--	--
Cluster-35353.51046	ZBTB	Cluster-35353.51046	UP	2.0618	1.56e-06	2974	9735548	XP_018906746.1	3135	0	PREDICTED: kelch-like protein 18 [Bemisia tabaci]	XM_019051201.1	XM_019051201	2417	0	PREDICTED: Bemisia tabaci kelch-like protein 18 (LOC109036825), mRNA	K10455	KLHL18	kelch-like protein 18	http://www.genome.jp/dbget-bin/www_bget?ko:K10455	O94889	1595	8.9e-176	Kelch-like protein 18 OS=Homo sapiens GN=KLHL18 PE=1 SV=3	PF07646//PF00651//PF01344	Kelch motif//BTB/POZ domain//Kelch motif	--	--	GO:0005515	protein binding	--	--	KOG4441	Proteins containing BTB/POZ and Kelch domains, involved in regulatory/signal transduction processes
Cluster-35353.65250	zf-C2H2	Cluster-35353.65250	UP	5.3606	6.1e-05	2955	9726306	XP_018897162.1	4297	0	PREDICTED: uncharacterized protein LOC109030581 [Bemisia tabaci]	XM_019041617.1	XM_019041617	2796	0	PREDICTED: Bemisia tabaci uncharacterized LOC109030581 (LOC109030581), mRNA	--	--	--	--	P47736	664	8e-68	Rap1 GTPase-activating protein 1 OS=Homo sapiens GN=RAP1GAP PE=1 SV=2	PF02145//PF00651//PF04647	Rap/ran-GAP//BTB/POZ domain//Accessory gene regulator B	GO:0051056//GO:0009405//GO:0009372	regulation of small GTPase mediated signal transduction//pathogenesis//quorum sensing	GO:0005515//GO:0005096//GO:0008233	protein binding//GTPase activator activity//peptidase activity	GO:0016021	integral component of membrane	KOG3686	Rap1-GTPase-activating protein (Rap1GAP)
Cluster-35353.20968	ZBTB	Cluster-35353.20968	UP	1.1749	2.53e-16	5325	9727942	XP_018898984.1	2383	1.8e-265	PREDICTED: zinc finger protein with KRAB and SCAN domains 7-like isoform X1 [Bemisia tabaci]	XM_019043440.1	XM_019043440	5007	0	PREDICTED: Bemisia tabaci zinc finger protein 652-B-like (LOC109031733), transcript variant X2, mRNA	--	--	--	--	P51814	432	1.1e-40	Zinc finger protein 41 OS=Homo sapiens GN=ZNF41 PE=1 SV=2	--	--	--	--	--	--	--	--	--	--
Cluster-35353.25794	zf-C2H2	Cluster-35353.25794	UP	3.4048	1.92e-05	832	9727805	XP_018898831.1	1239	1.3e-133	PREDICTED: uncharacterized protein LOC109031643 isoform X3 [Bemisia tabaci]	XM_019043287.1	XM_019043287	651	0	PREDICTED: Bemisia tabaci uncharacterized LOC109031643 (LOC109031643), transcript variant X4, mRNA	K09396	FOXC	forkhead box protein C	http://www.genome.jp/dbget-bin/www_bget?ko:K09396	Q99958	194	7.1e-14	Forkhead box protein C2 OS=Homo sapiens GN=FOXC2 PE=1 SV=1	PF12142//PF00605//PF00250//PF12201//PF00538	Polyphenol oxidase middle domain//Interferon regulatory factor transcription factor//Forkhead domain//Bcl2-interacting killer, BH3-domain containing//linker histone H1 and H5 family	GO:0006118//GO:0006915//GO:0006334//GO:0006355//GO:0006570//GO:0055114	obsolete electron transport//apoptotic process//nucleosome assembly//regulation of transcription, DNA-templated//tyrosine metabolic process//oxidation-reduction process	GO:0003700//GO:0004097//GO:0000975//GO:0043565//GO:0003677	transcription factor activity, sequence-specific DNA binding//catechol oxidase activity//regulatory region DNA binding//sequence-specific DNA binding//DNA binding	GO:0000786//GO:0005634//GO:0005667	nucleosome//nucleus//transcription factor complex	KOG2294	Transcription factor of the Forkhead/HNF3 family
Cluster-35353.36748	PAX	Cluster-35353.36748	UP	1.4153	1.1e-12	3429	9725404	XP_018896162.1	3541	0	PREDICTED: uncharacterized protein LOC109029913 [Bemisia tabaci]	XM_019040617.1	XM_019040617	2622	0	PREDICTED: Bemisia tabaci uncharacterized LOC109029913 (LOC109029913), mRNA	--	--	--	--	Q96IR2	260	6.5e-21	Zinc finger protein 845 OS=Homo sapiens GN=ZNF845 PE=2 SV=3	PF13465//PF16855//PF05324//PF01155//PF00096	Zinc-finger double domain//Small outer capsid protein//Sperm antigen HE2//Hydrogenase/urease nickel incorporation, metallochaperone, hypA//Zinc finger, C2H2 type	GO:0006464	cellular protein modification process	GO:0016151//GO:0046872	nickel cation binding//metal ion binding	GO:0005576//GO:0019028	extracellular region//viral capsid	--	--
Cluster-35353.34050	ZBTB	Cluster-35353.34050	UP	1.5661	2.46e-15	3436	5905708	XP_005101468.2	587	2.1e-57	PREDICTED: zinc finger protein 493-like [Aplysia californica]	XM_019052666.1	XM_019052666	2600	0	PREDICTED: Bemisia tabaci zinc finger protein 436-like (LOC109037840), mRNA	--	--	--	--	Q05481	544	7.6e-54	Zinc finger protein 91 OS=Homo sapiens GN=ZNF91 PE=2 SV=2	--	--	--	--	--	--	--	--	--	--
Cluster-35353.64852	ZBTB	Cluster-35353.64852	UP	2.9669	1.22e-05	3584	9723561	XP_018916264.1	2635	7.4e-295	PREDICTED: transcription factor collier [Bemisia tabaci]	XM_019060719.1	XM_019060719	2137	0	PREDICTED: Bemisia tabaci transcription factor collier (LOC109043516), mRNA	K09103	EBF, COE	early B-cell factor	http://www.genome.jp/dbget-bin/www_bget?ko:K09103	P56721	1968	6e-219	Transcription factor collier OS=Drosophila melanogaster GN=kn PE=2 SV=2	PF01833//PF16422	IPT/TIG domain//Transcription factor COE1 DNA-binding domain	--	--	GO:0003677//GO:0005515	DNA binding//protein binding	--	--	KOG3836	HLH transcription factor EBF/Olf-1 and related DNA binding proteins
Cluster-35353.51217	zf-C2H2	Cluster-35353.51217	UP	2.189	5.88e-18	5240	9732214	XP_018903741.1	3788	0	PREDICTED: transcriptional activator cubitus interruptus isoform X2 [Bemisia tabaci]	XM_019048196.1	XM_019048196	3789	0	PREDICTED: Bemisia tabaci transcriptional activator cubitus interruptus (LOC109034825), transcript variant X2, mRNA	K16799	CI	transcriptional activator cubitus interruptus	http://www.genome.jp/dbget-bin/www_bget?ko:K16799	P19538	955	2.6e-101	Transcriptional activator cubitus interruptus OS=Drosophila melanogaster GN=ci PE=1 SV=2	--	--	--	--	--	--	--	--	KOG1721	FOG: Zn-finger
Cluster-35353.420	Fork head	Cluster-35353.420	UP	2.7493	2.03e-06	4789	9728874	XP_018900027.1	1828	3.7e-201	PREDICTED: visual system homeobox 2-like [Bemisia tabaci]	XM_019044482.1	XM_019044482	4031	0	PREDICTED: Bemisia tabaci visual system homeobox 2-like (LOC109032386), mRNA	--	--	--	--	Q9IAL1	558	2.5e-55	Visual system homeobox 2 OS=Gallus gallus GN=VSX2 PE=2 SV=1	PF05920//PF00060//PF02532//PF00046	Homeobox KN domain//Ligand-gated ion channel//Photosystem II reaction centre I protein (PSII 4.8 kDa protein)//Homeobox domain	GO:0015979//GO:0007268//GO:0006811//GO:0006355//GO:0007165	photosynthesis//synaptic transmission//ion transport//regulation of transcription, DNA-templated//signal transduction	GO:0003677//GO:0004970	DNA binding//ionotropic glutamate receptor activity	GO:0016020//GO:0009539//GO:0009523	membrane//photosystem II reaction center//photosystem II	KOG0494	Transcription factor CHX10 and related HOX domain proteins
Cluster-35353.39807	zf-C2H2	Cluster-35353.39807	DOWN	-1.0257	0.0072979	1994	9975782	XP_019881131.1	221	3.4e-15	PREDICTED: longitudinals lacking protein, isoforms A..B..D..L isoform X16 [Aethina tumida]	XM_019051659.1	XM_019051659	63	1.12e-21	PREDICTED: Bemisia tabaci longitudinals lacking protein, isoforms H/M/V-like (LOC109037149), transcript variant X4, mRNA	--	--	--	--	Q867Z4	135	1.2e-06	Longitudinals lacking protein, isoforms F/I/K/T OS=Drosophila melanogaster GN=lola PE=1 SV=1	PF00096//PF13465	Zinc finger, C2H2 type//Zinc-finger double domain	--	--	GO:0046872	metal ion binding	--	--	--	--
Cluster-35353.28647	zf-C2H2	Cluster-35353.28647	UP	3.1072	2.54e-26	1864	9728531	XP_018899643.1	1710	7e-188	PREDICTED: Krueppel-like factor 14 [Bemisia tabaci]	XM_019044097.1	XM_019044097	1744	0	PREDICTED: Bemisia tabaci Krueppel-like factor 14 (LOC109032127), transcript variant X1, mRNA	K13943	CBT	cabut	http://www.genome.jp/dbget-bin/www_bget?ko:K13943	Q6NW96	343	8.4e-31	Transcription factor Sp9 OS=Danio rerio GN=sp9 PE=2 SV=1	--	--	--	--	--	--	--	--	--	--
Cluster-35353.42691	zf-C2H2	Cluster-35353.42691	DOWN	-1.1366	0.0098844	1269	9475609	XP_018332866.1	192	5e-12	PREDICTED: longitudinals lacking protein, isoforms A..B..D..L isoform X28 [Agrilus planipennis]	XM_019051659.1	XM_019051659	77	1.16e-29	PREDICTED: Bemisia tabaci longitudinals lacking protein, isoforms H/M/V-like (LOC109037149), transcript variant X4, mRNA	--	--	--	--	--	--	--	--	PF13465//PF06061//PF00096	Zinc-finger double domain//Baculoviridae ME53//Zinc finger, C2H2 type	--	--	GO:0003677//GO:0046872//GO:0008270	DNA binding//metal ion binding//zinc ion binding	--	--	--	--
Cluster-35353.51131	Homeobox	Cluster-35353.51131	DOWN	-1.4858	7.05e-16	1905	9733710	XP_018905404.1	2697	2.5e-302	PREDICTED: uncharacterized protein LOC109035982 isoform X1 [Bemisia tabaci]	XM_019049860.1	XM_019049860	1717	0	PREDICTED: Bemisia tabaci uncharacterized LOC109035982 (LOC109035982), transcript variant X2, mRNA	--	--	--	--	P18749	149	2.7e-08	Oocyte zinc finger protein XlCOF6 (Fragment) OS=Xenopus laevis PE=3 SV=1	PF00096//PF13465	Zinc finger, C2H2 type//Zinc-finger double domain	--	--	GO:0046872	metal ion binding	--	--	--	--
Cluster-35353.7330	zf-C2H2	Cluster-35353.7330	UP	1.3214	0.010864	4490	9729615	XP_018900848.1	2028	2.2e-224	PREDICTED: early growth response protein 1-A [Bemisia tabaci]	XM_019045302.1	XM_019045302	3865	0	PREDICTED: Bemisia tabaci early growth response protein 1-A (LOC109032947), transcript variant X1, mRNA	--	--	--	--	P17025	195	2.9e-13	Zinc finger protein 182 OS=Homo sapiens GN=ZNF182 PE=2 SV=2	PF00243//PF13465//PF13912//PF00096	Nerve growth factor family//Zinc-finger double domain//C2H2-type zinc finger//Zinc finger, C2H2 type	GO:0007165	signal transduction	GO:0046872//GO:0005102	metal ion binding//receptor binding	--	--	--	--
Cluster-35353.42096	zf-C2H2	Cluster-35353.42096	DOWN	-1.6809	6.45e-08	1047	9724503	XP_018917871.1	423	6.7e-39	PREDICTED: oocyte zinc finger protein XlCOF6-like isoform X3 [Bemisia tabaci]	XM_019062326.1	XM_019062326	208	1.44e-102	PREDICTED: Bemisia tabaci oocyte zinc finger protein XlCOF6-like (LOC109044541), transcript variant X3, mRNA	K09228	KRAB	KRAB domain-containing zinc finger protein	http://www.genome.jp/dbget-bin/www_bget?ko:K09228	P51523	335	4e-30	Zinc finger protein 84 OS=Homo sapiens GN=ZNF84 PE=1 SV=2	PF13912//PF00320//PF05495//PF16622//PF13465//PF00096//PF06467	C2H2-type zinc finger//GATA zinc finger//CHY zinc finger//zinc-finger C2H2-type//Zinc-finger double domain//Zinc finger, C2H2 type//MYM-type Zinc finger with FCS sequence motif	GO:0006355	regulation of transcription, DNA-templated	GO:0008270//GO:0003700//GO:0046872//GO:0043565	zinc ion binding//transcription factor activity, sequence-specific DNA binding//metal ion binding//sequence-specific DNA binding	GO:0005667	transcription factor complex	--	--
Cluster-35353.27076	zf-C2H2	Cluster-35353.27076	DOWN	-2.6805	2.05e-22	1057	9724910	XP_018895611.1	606	4.1e-60	PREDICTED: zinc finger protein 850-like [Bemisia tabaci]	XM_019042244.1	XM_019042244	354	0	PREDICTED: Bemisia tabaci gastrula zinc finger protein XlCGF57.1-like (LOC109030985), transcript variant X2, mRNA	K09228	KRAB	KRAB domain-containing zinc finger protein	http://www.genome.jp/dbget-bin/www_bget?ko:K09228	Q6ZMW2	472	5.2e-46	Zinc finger protein 782 OS=Homo sapiens GN=ZNF782 PE=2 SV=1	PF13465//PF00628//PF00096//PF01785//PF12833//PF02892//PF13912	Zinc-finger double domain//PHD-finger//Zinc finger, C2H2 type//Closterovirus coat protein//Helix-turn-helix domain//BED zinc finger//C2H2-type zinc finger	GO:0006355	regulation of transcription, DNA-templated	GO:0003700//GO:0005515//GO:0003677//GO:0046872//GO:0043565	transcription factor activity, sequence-specific DNA binding//protein binding//DNA binding//metal ion binding//sequence-specific DNA binding	GO:0019012//GO:0005667	virion//transcription factor complex	--	--
Cluster-35353.24486	zf-C2H2	Cluster-35353.24486	UP	2.5498	0.0026686	3255	9750462	XP_018908734.1	4516	0	PREDICTED: zinc finger protein 665-like [Bemisia tabaci]	XM_019053189.1	XM_019053189	2400	0	PREDICTED: Bemisia tabaci zinc finger protein 665-like (LOC109038204), transcript variant X2, mRNA	--	--	--	--	Q9N003	889	7.1e-94	Zinc finger protein 425 (Fragment) OS=Macaca fascicularis GN=ZNF425 PE=2 SV=2	PF13912//PF00096//PF16622//PF13465	C2H2-type zinc finger//Zinc finger, C2H2 type//zinc-finger C2H2-type//Zinc-finger double domain	--	--	GO:0046872	metal ion binding	--	--	--	--
Cluster-35353.29028	zf-C2H2	Cluster-35353.29028	UP	4.2915	3.88e-21	4514	3308191	ELU03131.1	430	4.5e-39	hypothetical protein CAPTEDRAFT_198317 [Capitella teleta]	XM_019049129.1	XM_019049129	3234	0	PREDICTED: Bemisia tabaci PR domain zinc finger protein 1-like (LOC109035475), mRNA	--	--	--	--	Q14590	407	7.7e-38	Zinc finger protein 235 OS=Homo sapiens GN=ZNF235 PE=2 SV=3	PF00856//PF00096//PF13912//PF13465	SET domain//Zinc finger, C2H2 type//C2H2-type zinc finger//Zinc-finger double domain	--	--	GO:0046872//GO:0005515	metal ion binding//protein binding	--	--	--	--
Cluster-35353.63845	zf-C2H2	Cluster-35353.63845	UP	2.1956	0.00076945	4496	9766467	XP_018912073.1	2127	7.5e-236	PREDICTED: zinc finger BED domain-containing protein 6 [Bemisia tabaci]	XM_019056528.1	XM_019056528	1424	0	PREDICTED: Bemisia tabaci zinc finger BED domain-containing protein 6 (LOC109040552), mRNA	--	--	--	--	D2EAC2	160	3.4e-09	Zinc finger BED domain-containing protein 6 OS=Mus musculus GN=Zbed6 PE=1 SV=1	PF14372//PF05699//PF02892	Domain of unknown function (DUF4413)//hAT family C-terminal dimerisation region//BED zinc finger	--	--	GO:0003677//GO:0046983	DNA binding//protein dimerization activity	--	--	--	--
Cluster-35353.50712	zf-C2H2	Cluster-35353.50712	UP	1.1148	0.00017933	2119	9729170	XP_018900357.1	2032	3.6e-225	PREDICTED: uncharacterized protein LOC109032596 [Bemisia tabaci]	XM_019044812.1	XM_019044812	1884	0	PREDICTED: Bemisia tabaci uncharacterized LOC109032596 (LOC109032596), mRNA	--	--	--	--	Q5R4K8	385	1.3e-35	Zinc finger protein 615 OS=Pongo abelii GN=ZNF615 PE=2 SV=2	PF00096//PF13465	Zinc finger, C2H2 type//Zinc-finger double domain	--	--	GO:0046872	metal ion binding	--	--	--	--
Cluster-35353.21063	zf-C2H2	Cluster-35353.21063	DOWN	-1.0355	0.02701	1767	9728455	XP_018899558.1	942	7.5e-99	PREDICTED: gastrula zinc finger protein XlCGF26.1 isoform X1 [Bemisia tabaci]	XM_019044014.1	XM_019044014	1459	0	PREDICTED: Bemisia tabaci gastrula zinc finger protein XlCGF26.1 (LOC109032075), transcript variant X4, mRNA	K09228	KRAB	KRAB domain-containing zinc finger protein	http://www.genome.jp/dbget-bin/www_bget?ko:K09228	P51523	475	3.9e-46	Zinc finger protein 84 OS=Homo sapiens GN=ZNF84 PE=1 SV=2	PF02892//PF00096//PF14622//PF13465//PF13912//PF06467//PF00130	BED zinc finger//Zinc finger, C2H2 type//Ribonuclease-III-like//Zinc-finger double domain//C2H2-type zinc finger//MYM-type Zinc finger with FCS sequence motif//Phorbol esters/diacylglycerol binding domain (C1 domain)	GO:0051252//GO:0006396//GO:0035556	regulation of RNA metabolic process//RNA processing//intracellular signal transduction	GO:0003677//GO:0004525//GO:0003723//GO:0046872//GO:0008270	DNA binding//ribonuclease III activity//RNA binding//metal ion binding//zinc ion binding	--	--	--	--
Cluster-35353.57455	zf-C2H2	Cluster-35353.57455	UP	2.7603	4.47e-10	1338	9732599	XP_018904168.1	723	1.4e-73	PREDICTED: oocyte zinc finger protein XlCOF22-like isoform X1 [Bemisia tabaci]	--	--	--	--	--	K09228	KRAB	KRAB domain-containing zinc finger protein	http://www.genome.jp/dbget-bin/www_bget?ko:K09228	P18745	367	9.9e-34	Oocyte zinc finger protein XlCOF22 OS=Xenopus laevis PE=3 SV=1	PF01155//PF01428//PF06467//PF04777//PF13912//PF13465//PF00096	Hydrogenase/urease nickel incorporation, metallochaperone, hypA//AN1-like Zinc finger//MYM-type Zinc finger with FCS sequence motif//Erv1 / Alr family//C2H2-type zinc finger//Zinc-finger double domain//Zinc finger, C2H2 type	GO:0055114//GO:0006464	oxidation-reduction process//cellular protein modification process	GO:0008270//GO:0016972//GO:0046872//GO:0016151	zinc ion binding//thiol oxidase activity//metal ion binding//nickel cation binding	--	--	--	--
Cluster-35353.44502	zf-BED	Cluster-35353.44502	DOWN	-1.0449	0.014868	2065	7693363	XP_015365376.1	228	5.4e-16	PREDICTED: longitudinals lacking protein, isoforms H..M..V-like isoform X4 [Diuraphis noxia]	XM_019051659.1	XM_019051659	82	3.18e-32	PREDICTED: Bemisia tabaci longitudinals lacking protein, isoforms H/M/V-like (LOC109037149), transcript variant X4, mRNA	--	--	--	--	Q9N003	128	7.9e-06	Zinc finger protein 425 (Fragment) OS=Macaca fascicularis GN=ZNF425 PE=2 SV=2	PF13465//PF16622//PF02176//PF00096//PF02892//PF13912	Zinc-finger double domain//zinc-finger C2H2-type//TRAF-type zinc finger//Zinc finger, C2H2 type//BED zinc finger//C2H2-type zinc finger	--	--	GO:0046872//GO:0003677//GO:0008270	metal ion binding//DNA binding//zinc ion binding	--	--	--	--
Cluster-35353.53506	zf-C2H2	Cluster-35353.53506	UP	1.826	0.019459	351	9732599	XP_018904168.1	419	6.6e-39	PREDICTED: oocyte zinc finger protein XlCOF22-like isoform X1 [Bemisia tabaci]	XM_019048623.1	XM_019048623	227	1.24e-113	PREDICTED: Bemisia tabaci oocyte zinc finger protein XlCOF22-like (LOC109035127), transcript variant X1, mRNA	K09228	KRAB	KRAB domain-containing zinc finger protein	http://www.genome.jp/dbget-bin/www_bget?ko:K09228	Q8N393	195	2.3e-14	Zinc finger protein 786 OS=Homo sapiens GN=ZNF786 PE=2 SV=2	PF01155//PF13465//PF06467//PF00096//PF02146//PF03604//PF08996//PF16622//PF02150//PF01428//PF00412	Hydrogenase/urease nickel incorporation, metallochaperone, hypA//Zinc-finger double domain//MYM-type Zinc finger with FCS sequence motif//Zinc finger, C2H2 type//Sir2 family//DNA directed RNA polymerase, 7 kDa subunit//DNA Polymerase alpha zinc finger//zinc-finger C2H2-type//RNA polymerases M/15 Kd subunit//AN1-like Zinc finger//LIM domain	GO:0006464//GO:0006260//GO:0006144//GO:0006206//GO:0006351	cellular protein modification process//DNA replication//purine nucleobase metabolic process//pyrimidine nucleobase metabolic process//transcription, DNA-templated	GO:0001882//GO:0070403//GO:0008270//GO:0016151//GO:0003899//GO:0046872//GO:0003887//GO:0003677	nucleoside binding//NAD+ binding//zinc ion binding//nickel cation binding//DNA-directed RNA polymerase activity//metal ion binding//DNA-directed DNA polymerase activity//DNA binding	GO:0005730//GO:0042575	nucleolus//DNA polymerase complex	--	--
Cluster-35353.38377	zf-C2H2	Cluster-35353.38377	DOWN	-1.0471	0.016743	1544	9739052	XP_018916084.1	206	1.4e-13	PREDICTED: gastrula zinc finger protein XlCGF7.1-like [Bemisia tabaci]	XM_019048338.1	XM_019048338	76	5.12e-29	PREDICTED: Bemisia tabaci protein bric-a-brac 2-like (LOC109034918), mRNA	--	--	--	--	--	--	--	--	PF13465//PF02892//PF13912//PF00096//PF03967	Zinc-finger double domain//BED zinc finger//C2H2-type zinc finger//Zinc finger, C2H2 type//Photosynthetic reaction centre, H-chain N-terminal region	GO:0019684//GO:0006118	photosynthesis, light reaction//obsolete electron transport	GO:0003677//GO:0045156//GO:0046872	DNA binding//electron transporter, transferring electrons within the cyclic electron transport pathway of photosynthesis activity//metal ion binding	GO:0030077	plasma membrane light-harvesting complex	--	--
Cluster-35353.27075	zf-C2H2	Cluster-35353.27075	DOWN	-2.1068	1.09e-11	904	9725008	XP_018895719.1	324	1.8e-27	PREDICTED: oocyte zinc finger protein XlCOF6-like [Bemisia tabaci]	XM_019040066.1	XM_019040066	301	2.47e-154	PREDICTED: Bemisia tabaci zinc finger protein 850-like (LOC109029567), mRNA	K09228	KRAB	KRAB domain-containing zinc finger protein	http://www.genome.jp/dbget-bin/www_bget?ko:K09228	Q9BY31	234	1.8e-18	Zinc finger protein 717 OS=Homo sapiens GN=ZNF717 PE=2 SV=2	PF02892//PF06467//PF00096//PF03604//PF11648//PF00130//PF13465	BED zinc finger//MYM-type Zinc finger with FCS sequence motif//Zinc finger, C2H2 type//DNA directed RNA polymerase, 7 kDa subunit//C-terminal domain of RIG-I//Phorbol esters/diacylglycerol binding domain (C1 domain)//Zinc-finger double domain	GO:0006144//GO:0006206//GO:0006351//GO:0035556	purine nucleobase metabolic process//pyrimidine nucleobase metabolic process//transcription, DNA-templated//intracellular signal transduction	GO:0003899//GO:0046872//GO:0003677//GO:0008270//GO:0016817	DNA-directed RNA polymerase activity//metal ion binding//DNA binding//zinc ion binding//hydrolase activity, acting on acid anhydrides	GO:0005730	nucleolus	--	--
Cluster-35353.44018	zf-C2H2	Cluster-35353.44018	DOWN	-1.0511	0.0070069	1041	11813370	XP_023714046.1	193	3.1e-12	broad-complex core protein isoforms 1..2..3..4..5-like isoform X17 [Cryptotermes secundus]	XR_002010201.1	XR_002010201	316	1.31e-162	PREDICTED: Bemisia tabaci uncharacterized LOC109043454 (LOC109043454), ncRNA	--	--	--	--	--	--	--	--	PF04810//PF13465//PF13912//PF00096//PF02892//PF16622	Sec23/Sec24 zinc finger//Zinc-finger double domain//C2H2-type zinc finger//Zinc finger, C2H2 type//BED zinc finger//zinc-finger C2H2-type	GO:0006886//GO:0006888	intracellular protein transport//ER to Golgi vesicle-mediated transport	GO:0008270//GO:0003677//GO:0046872	zinc ion binding//DNA binding//metal ion binding	GO:0030127	COPII vesicle coat	--	--
Cluster-35353.52069	zf-C2H2	Cluster-35353.52069	UP	1.7273	0.01727	1891	9729451	XP_018900667.1	2441	1.2e-272	PREDICTED: calmodulin-binding transcription activator 1 isoform X3 [Bemisia tabaci]	XM_019045122.1	XM_019045122	1667	0	PREDICTED: Bemisia tabaci calmodulin-binding transcription activator 2 (LOC109032821), transcript variant X3, mRNA	--	--	--	--	Q9Y6Y1	650	2.1e-66	Calmodulin-binding transcription activator 1 OS=Homo sapiens GN=CAMTA1 PE=1 SV=4	--	--	--	--	--	--	--	--	KOG0520	Uncharacterized conserved protein, contains IPT/TIG domain
Cluster-35353.46932	zf-C2H2	Cluster-35353.46932	UP	1.9727	3.85e-08	2780	9766796	XP_018912439.1	1425	1.2e-154	PREDICTED: transcription factor Ken [Bemisia tabaci]	XM_019056895.1	XM_019056895	2525	0	PREDICTED: Bemisia tabaci transcription factor Ken (LOC109040815), transcript variant X3, mRNA	--	--	--	--	B0X9H6	624	3.3e-63	Transcription factor Ken 1 OS=Culex quinquefasciatus GN=ken1 PE=3 SV=1	PF13465//PF13912//PF00096	Zinc-finger double domain//C2H2-type zinc finger//Zinc finger, C2H2 type	--	--	GO:0046872	metal ion binding	--	--	--	--
Cluster-35353.47407	zf-C2H2	Cluster-35353.47407	DOWN	-1.1202	0.016309	557	2478319	XP_001947779.2	142	1.4e-06	PREDICTED: zinc finger protein 436 [Acyrthosiphon pisum]	XM_019048338.1	XM_019048338	72	2.97e-27	PREDICTED: Bemisia tabaci protein bric-a-brac 2-like (LOC109034918), mRNA	--	--	--	--	--	--	--	--	PF13912//PF16622//PF00096//PF13465//PF06689//PF02892	C2H2-type zinc finger//zinc-finger C2H2-type//Zinc finger, C2H2 type//Zinc-finger double domain//ClpX C4-type zinc finger//BED zinc finger	--	--	GO:0046872//GO:0046983//GO:0003677//GO:0008270	metal ion binding//protein dimerization activity//DNA binding//zinc ion binding	--	--	--	--
Cluster-35353.25082	zf-C2H2	Cluster-35353.25082	UP	2.3721	6.15e-08	664	9725066	XP_018895785.1	345	4.7e-30	PREDICTED: zinc finger protein 425-like [Bemisia tabaci]	XR_002008643.1	XR_002008643	403	0	PREDICTED: Bemisia tabaci uncharacterized LOC109029708 (LOC109029708), transcript variant X4, misc_RNA	--	--	--	--	Q9N003	227	8.4e-18	Zinc finger protein 425 (Fragment) OS=Macaca fascicularis GN=ZNF425 PE=2 SV=2	PF02150//PF00412//PF13465//PF02146//PF00096//PF00628	RNA polymerases M/15 Kd subunit//LIM domain//Zinc-finger double domain//Sir2 family//Zinc finger, C2H2 type//PHD-finger	GO:0006206//GO:0006351//GO:0006144	pyrimidine nucleobase metabolic process//transcription, DNA-templated//purine nucleobase metabolic process	GO:0005515//GO:0070403//GO:0008270//GO:0003677//GO:0046872//GO:0003899	protein binding//NAD+ binding//zinc ion binding//DNA binding//metal ion binding//DNA-directed RNA polymerase activity	GO:0005730	nucleolus	--	--
Cluster-34835.0	zf-C2H2	Cluster-34835.0	UP	2.4127	0.0069243	2849	9726192	XP_018897036.1	2085	3.5e-231	PREDICTED: nuclear receptor subfamily 2 group E member 1-like isoform X1 [Bemisia tabaci]	XM_019041491.1	XM_019041491	1223	0	PREDICTED: Bemisia tabaci nuclear receptor subfamily 2 group E member 1-like (LOC109030498), transcript variant X1, mRNA	K07295	NR2AN, dsf	nuclear receptor subfamily 2 group A	http://www.genome.jp/dbget-bin/www_bget?ko:K07295	Q9Y5X4	747	1.8e-77	Photoreceptor-specific nuclear receptor OS=Homo sapiens GN=NR2E3 PE=1 SV=1	PF00105//PF00104//PF06888	Zinc finger, C4 type (two domains)//Ligand-binding domain of nuclear hormone receptor//Putative Phosphatase	GO:0008152//GO:0006355//GO:0043401	metabolic process//regulation of transcription, DNA-templated//steroid hormone mediated signaling pathway	GO:0016791//GO:0043565//GO:0008270//GO:0003700	phosphatase activity//sequence-specific DNA binding//zinc ion binding//transcription factor activity, sequence-specific DNA binding	GO:0005667//GO:0005634	transcription factor complex//nucleus	--	--
Cluster-35353.66518	zf-C2H2	Cluster-35353.66518	UP	2.5612	0.0025001	1795	9731626	XP_018903089.1	1162	2.4e-124	PREDICTED: ETS domain-containing protein Elk-3-like [Bemisia tabaci]	XM_019047544.1	XM_019047544	1611	0	PREDICTED: Bemisia tabaci ETS domain-containing protein Elk-3-like (LOC109034418), mRNA	K09430	ELK3	ETS domain-containing protein Elk-3 (SRF accessory protein 2)	http://www.genome.jp/dbget-bin/www_bget?ko:K09430	P41970	351	9.6e-32	ETS domain-containing protein Elk-3 OS=Homo sapiens GN=ELK3 PE=1 SV=2	PF00447//PF00178	HSF-type DNA-binding//Ets-domain	GO:0006355	regulation of transcription, DNA-templated	GO:0043565//GO:0003700	sequence-specific DNA binding//transcription factor activity, sequence-specific DNA binding	GO:0005667//GO:0005634	transcription factor complex//nucleus	KOG3806	Predicted transcription factor
Cluster-35353.50987	zf-C2H2	Cluster-35353.50987	DOWN	-1.0534	0.048111	1430	9725320	XP_018896069.1	801	1.4e-82	PREDICTED: longitudinals lacking protein, isoforms H..M..V-like isoform X2 [Bemisia tabaci]	XM_019040524.1	XM_019040524	1389	0	PREDICTED: Bemisia tabaci longitudinals lacking protein, isoforms H/M/V-like (LOC109029854), transcript variant X2, mRNA	--	--	--	--	--	--	--	--	PF13912//PF02892//PF00096//PF17123//PF13465	C2H2-type zinc finger//BED zinc finger//Zinc finger, C2H2 type//RING-like zinc finger//Zinc-finger double domain	--	--	GO:0008270//GO:0005515//GO:0046872//GO:0003677	zinc ion binding//protein binding//metal ion binding//DNA binding	--	--	KOG1721	FOG: Zn-finger
Cluster-35353.16839	RXR-like	Cluster-35353.16839	UP	2.3846	0.020917	1134	9732599	XP_018904168.1	656	7e-66	PREDICTED: oocyte zinc finger protein XlCOF22-like isoform X1 [Bemisia tabaci]	XM_019040240.1	XM_019040240	181	1.59e-87	PREDICTED: Bemisia tabaci zinc finger protein 425-like (LOC109029667), mRNA	K09228	KRAB	KRAB domain-containing zinc finger protein	http://www.genome.jp/dbget-bin/www_bget?ko:K09228	Q6IV72	379	3.4e-35	Zinc finger protein 425 OS=Homo sapiens GN=ZNF425 PE=1 SV=1	--	--	--	--	--	--	--	--	--	--
Cluster-35353.52852	ETS	Cluster-35353.52852	DOWN	-1.1694	0.030706	1924	--	--	--	--	--	XM_019051668.1	XM_019051668	1248	0	PREDICTED: Bemisia tabaci transcription factor IIIA-like (LOC109037158), mRNA	--	--	--	--	--	--	--	--	PF01428//PF00096//PF02892//PF13465//PF01699//PF16622	AN1-like Zinc finger//Zinc finger, C2H2 type//BED zinc finger//Zinc-finger double domain//Sodium/calcium exchanger protein//zinc-finger C2H2-type	GO:0055085	transmembrane transport	GO:0003677//GO:0046872//GO:0008270	DNA binding//metal ion binding//zinc ion binding	GO:0016021	integral component of membrane	--	--
Cluster-34228.0	zf-C2H2	Cluster-34228.0	UP	5.0252	0.00030144	1082	10306552	XP_012261626.2	356	4.1e-31	putative mediator of RNA polymerase II transcription subunit 26 [Athalia rosae]	XM_019046019.1	XM_019046019	62	2.15e-21	PREDICTED: Bemisia tabaci homeobox protein Hmx (LOC109033417), mRNA	K08030	NKX6-1	homeobox protein Nkx-6.1	http://www.genome.jp/dbget-bin/www_bget?ko:K08030	P56407	274	4.9e-23	Homeobox protein ceh-9 OS=Caenorhabditis elegans GN=ceh-9 PE=3 SV=2	--	--	--	--	--	--	--	--	KOG0847	Transcription factor, contains HOX domain
Cluster-35353.11805	zf-C2H2	Cluster-35353.11805	UP	4.3594	0.00026616	2378	9765889	XP_018911432.1	2939	0	PREDICTED: protein jim lovell isoform X3 [Bemisia tabaci]	XM_019055887.1	XM_019055887	1976	0	PREDICTED: Bemisia tabaci protein jim lovell (LOC109040088), transcript variant X3, mRNA	--	--	--	--	P14083	477	3.1e-46	Protein jim lovell OS=Drosophila melanogaster GN=lov PE=2 SV=2	PF05225//PF00651	helix-turn-helix, Psq domain//BTB/POZ domain	--	--	GO:0005515//GO:0003677	protein binding//DNA binding	--	--	--	--
Cluster-35353.25117	zf-C2H2	Cluster-35353.25117	UP	1.7892	0.046292	2335	9722447	XP_018904607.1	2158	9.9e-240	PREDICTED: T-box transcription factor TBX10-like isoform X1 [Bemisia tabaci]	XM_019049062.1	XM_019049062	1700	0	PREDICTED: Bemisia tabaci T-box transcription factor TBX10-like (LOC109035427), transcript variant X1, mRNA	K10175	TBX1	T-box protein 1	http://www.genome.jp/dbget-bin/www_bget?ko:K10175	Q3SA49	770	3.2e-80	T-box transcription factor TBX1 OS=Xenopus tropicalis GN=tbx1 PE=2 SV=1	PF00907	T-box	GO:0006355	regulation of transcription, DNA-templated	GO:0003700	transcription factor activity, sequence-specific DNA binding	GO:0005667//GO:0005634	transcription factor complex//nucleus	--	--
Cluster-35353.47767	Homeobox	Cluster-35353.47767	DOWN	-1.7107	0.00079222	1691	9739071	XP_018916104.1	199	1e-12	PREDICTED: zinc finger protein 253-like, partial [Bemisia tabaci]	XM_019048338.1	XM_019048338	75	2.02e-28	PREDICTED: Bemisia tabaci protein bric-a-brac 2-like (LOC109034918), mRNA	--	--	--	--	--	--	--	--	--	--	--	--	--	--	--	--	--	--
Cluster-35353.10201	ZBTB	Cluster-35353.10201	DOWN	-1.9015	0.00068573	3815	2772356	GAA57894.1	1365	1.4e-147	aminoglycoside 3'-phosphotransferase [Clonorchis sinensis]	KM062046.1	KM062046	2230	0	Cloning vector pPLV03_v2, complete sequence	--	--	--	--	P00551	1457	1.1e-159	Aminoglycoside 3'-phosphotransferase OS=Escherichia coli GN=aphA1 PE=3 SV=2	PF07716//PF00170//PF07655//PF05053//PF03131	Basic region leucine zipper//bZIP transcription factor//Secretin N-terminal domain//Menin//bZIP Maf transcription factor	GO:0006355//GO:0009297	regulation of transcription, DNA-templated//pilus assembly	GO:0003700//GO:0003677//GO:0043565	transcription factor activity, sequence-specific DNA binding//DNA binding//sequence-specific DNA binding	GO:0019867//GO:0005667//GO:0005634	outer membrane//transcription factor complex//nucleus	--	--
Cluster-35353.12852	T-box	Cluster-35353.12852	UP	1.6287	0.040049	2222	9751885	XP_018908766.1	2725	1.7e-305	PREDICTED: gastrula zinc finger protein XlCGF57.1-like [Bemisia tabaci]	XM_019053221.1	XM_019053221	1853	0	PREDICTED: Bemisia tabaci gastrula zinc finger protein XlCGF57.1-like (LOC109038234), mRNA	--	--	--	--	Q6IV72	548	1.7e-54	Zinc finger protein 425 OS=Homo sapiens GN=ZNF425 PE=1 SV=1	--	--	--	--	--	--	--	--	--	--
Cluster-35353.40910	zf-C2H2	Cluster-35353.40910	UP	3.4538	2.9e-09	4321	11119300	XP_022303386.1	400	1.3e-35	putative zinc finger protein 66 [Crassostrea virginica]	XM_019043127.1	XM_019043127	1481	0	PREDICTED: Bemisia tabaci zinc finger protein rotund-like (LOC109031550), transcript variant X3, mRNA	--	--	--	--	Q0VAW7	400	4.8e-37	Zinc finger protein 112 OS=Mus musculus GN=Znf112 PE=2 SV=2	PF16622//PF13465//PF13912//PF00096//PF11654	zinc-finger C2H2-type//Zinc-finger double domain//C2H2-type zinc finger//Zinc finger, C2H2 type//Protein of unknown function (DUF2665)	GO:0009306	protein secretion	GO:0046872	metal ion binding	--	--	--	--
Cluster-35353.49310	TF_bZIP	Cluster-35353.49310	UP	3.1102	7.95e-09	4552	9732879	XP_018904482.1	2924	0	PREDICTED: B-cell lymphoma..leukemia 11A [Bemisia tabaci]	XM_019048937.1	XM_019048937	2417	0	PREDICTED: Bemisia tabaci B-cell lymphoma/leukemia 11A (LOC109035344), mRNA	--	--	--	--	Q9NSJ1	218	6.4e-16	Putative zinc finger protein 355P OS=Homo sapiens GN=ZNF355P PE=5 SV=2	--	--	--	--	--	--	--	--	--	--
Cluster-35353.10244	zf-C2H2	Cluster-35353.10244	UP	4.399	0.00027778	1426	9742096	XP_018908363.1	990	1.6e-104	PREDICTED: homeobox protein abdominal-A homolog isoform X1 [Bemisia tabaci]	XM_019052818.1	XM_019052818	1303	0	PREDICTED: Bemisia tabaci homeobox protein abdominal-A homolog (LOC109037944), transcript variant X1, mRNA	K09311	ANTP	Antp family, other	http://www.genome.jp/dbget-bin/www_bget?ko:K09311	Q07961	493	2.6e-48	Homeobox protein abdominal-A homolog OS=Tribolium castaneum GN=ABD-A PE=2 SV=2	PF00046	Homeobox domain	--	--	GO:0003677	DNA binding	--	--	--	--
Cluster-35353.16638	zf-C2H2	Cluster-35353.16638	UP	5.2632	0.0017956	1942	9735948	XP_018907191.1	1793	1.7e-197	PREDICTED: runt-related transcription factor 2-like isoform X2 [Bemisia tabaci]	XM_019051646.1	XM_019051646	1715	0	PREDICTED: Bemisia tabaci runt-related transcription factor 2-like (LOC109037136), transcript variant X2, mRNA	--	--	--	--	Q9W349	530	1.8e-52	Protein lozenge OS=Drosophila melanogaster GN=lz PE=2 SV=2	PF00853	Runt domain	GO:0006355	regulation of transcription, DNA-templated	GO:0003700//GO:0003677	transcription factor activity, sequence-specific DNA binding//DNA binding	GO:0005667	transcription factor complex	KOG3982	Runt and related transcription factors
Cluster-35353.49207	zf-C2H2	Cluster-35353.49207	UP	7.4589	1.43e-07	2409	4503372	XP_008470307.1	1207	1.9e-129	PREDICTED: uncharacterized protein LOC103507594 [Diaphorina citri]	XM_019051642.1	XM_019051642	2055	0	PREDICTED: Bemisia tabaci early growth response protein 1-B (LOC109037132), mRNA	K12497	EGR3	early growth response protein 3	http://www.genome.jp/dbget-bin/www_bget?ko:K12497	A6NK53	249	8.6e-20	Zinc finger protein 233 OS=Homo sapiens GN=ZNF233 PE=2 SV=3	PF13465//PF11593//PF02207//PF02892//PF00096	Zinc-finger double domain//Mediator complex subunit 3 fungal//Putative zinc finger in N-recognin (UBR box)//BED zinc finger//Zinc finger, C2H2 type	GO:0006357	regulation of transcription from RNA polymerase II promoter	GO:0046872//GO:0001104//GO:0003677//GO:0008270	metal ion binding//RNA polymerase II transcription cofactor activity//DNA binding//zinc ion binding	GO:0016592	mediator complex	--	--
Cluster-34959.0	Homeobox	Cluster-34959.0	UP	5.1963	0.0021854	2705	9724918	XP_018895620.1	845	2e-87	PREDICTED: protein Fer3-like [Bemisia tabaci]	XM_019040075.1	XM_019040075	1036	0	PREDICTED: Bemisia tabaci protein Fer3-like (LOC109029576), mRNA	--	--	--	--	Q9QX98	138	7.2e-07	Pancreas transcription factor 1 subunit alpha OS=Mus musculus GN=Ptf1a PE=1 SV=1	PF00010	Helix-loop-helix DNA-binding domain	--	--	GO:0046983	protein dimerization activity	--	--	KOG4029	Transcription factor HAND2/Transcription factor TAL1/TAL2/LYL1
Cluster-35353.17883	zf-C2H2	Cluster-35353.17883	DOWN	-1.4898	0.012321	1108	9722180	XP_018901646.1	657	5.2e-66	PREDICTED: zinc finger protein 236-like [Bemisia tabaci]	XM_019046101.1	XM_019046101	567	0	PREDICTED: Bemisia tabaci zinc finger protein 236-like (LOC109033469), mRNA	K09228	KRAB	KRAB domain-containing zinc finger protein	http://www.genome.jp/dbget-bin/www_bget?ko:K09228	P18729	497	6.9e-49	Gastrula zinc finger protein XlCGF57.1 (Fragment) OS=Xenopus laevis PE=3 SV=1	PF00096//PF01428//PF13465//PF13912//PF00959//PF00412//PF05191	Zinc finger, C2H2 type//AN1-like Zinc finger//Zinc-finger double domain//C2H2-type zinc finger//Phage lysozyme//LIM domain//Adenylate kinase, active site lid	GO:0016998//GO:0009253//GO:0006144//GO:0005975//GO:0046034	cell wall macromolecule catabolic process//peptidoglycan catabolic process//purine nucleobase metabolic process//carbohydrate metabolic process//ATP metabolic process	GO:0003796//GO:0046872//GO:0004017//GO:0008270	lysozyme activity//metal ion binding//adenylate kinase activity//zinc ion binding	--	--	--	--
Cluster-35353.21482	bHLH	Cluster-35353.21482	UP	3.1448	0.026817	1962	9735934	XP_018907175.1	1973	2.3e-218	PREDICTED: runt-related transcription factor 3 isoform X1 [Bemisia tabaci]	XM_019051630.1	XM_019051630	1798	0	PREDICTED: Bemisia tabaci runt-related transcription factor 3 (LOC109037127), transcript variant X1, mRNA	K08367	RUNX1, AML1	runt-related transcription factor 1	http://www.genome.jp/dbget-bin/www_bget?ko:K08367	Q64131	547	2e-54	Runt-related transcription factor 3 OS=Mus musculus GN=Runx3 PE=2 SV=3	PF00853	Runt domain	GO:0006355	regulation of transcription, DNA-templated	GO:0003700//GO:0003677	transcription factor activity, sequence-specific DNA binding//DNA binding	GO:0005667	transcription factor complex	KOG3982	Runt and related transcription factors
Cluster-35353.64619	zf-C2H2	Cluster-35353.64619	DOWN	-1.447	0.03484	662	9735806	XP_018907034.1	771	1.9e-79	PREDICTED: gastrula zinc finger protein XlCGF57.1-like [Bemisia tabaci]	XM_019051490.1	XM_019051490	641	0	PREDICTED: Bemisia tabaci gastrula zinc finger protein XlCGF57.1-like (LOC109037016), transcript variant X3, mRNA	K09228	KRAB	KRAB domain-containing zinc finger protein	http://www.genome.jp/dbget-bin/www_bget?ko:K09228	Q6ZMW2	372	1.3e-34	Zinc finger protein 782 OS=Homo sapiens GN=ZNF782 PE=2 SV=1	PF13912//PF13465//PF00096//PF16622	C2H2-type zinc finger//Zinc-finger double domain//Zinc finger, C2H2 type//zinc-finger C2H2-type	--	--	GO:0046872	metal ion binding	--	--	--	--
Cluster-35353.19305	Runt	Cluster-35353.19305	UP	6.686	2.47e-05	916	9765706	XP_018911226.1	242	5.8e-18	PREDICTED: uncharacterized protein LOC109039948 [Bemisia tabaci]	XM_019062552.1	XM_019062552	540	0	PREDICTED: Bemisia tabaci zinc finger protein SNAI2-like (LOC109044716), mRNA	K05706	SNAI2, SLUG	snail 2	http://www.genome.jp/dbget-bin/www_bget?ko:K05706	Q13360	246	7.3e-20	Zinc finger protein 177 OS=Homo sapiens GN=ZNF177 PE=1 SV=4	--	--	--	--	--	--	--	--	--	--
Cluster-35353.16840	zf-C2H2	Cluster-35353.16840	UP	4.0053	5.01e-06	1319	9725066	XP_018895785.1	1969	4.6e-218	PREDICTED: zinc finger protein 425-like [Bemisia tabaci]	XM_019040240.1	XM_019040240	1041	0	PREDICTED: Bemisia tabaci zinc finger protein 425-like (LOC109029667), mRNA	--	--	--	--	Q8N393	359	8.3e-33	Zinc finger protein 786 OS=Homo sapiens GN=ZNF786 PE=2 SV=2	PF16622//PF13465//PF00096//PF01155	zinc-finger C2H2-type//Zinc-finger double domain//Zinc finger, C2H2 type//Hydrogenase/urease nickel incorporation, metallochaperone, hypA	GO:0006464	cellular protein modification process	GO:0046872//GO:0016151	metal ion binding//nickel cation binding	--	--	--	--
Cluster-35353.2116	zf-C2H2	Cluster-35353.2116	UP	3.9786	0.001832	2268	9724741	XP_018918141.1	2096	1.5e-232	PREDICTED: paired box protein Pax-6 isoform X1 [Bemisia tabaci]	XM_019062596.1	XM_019062596	1671	0	PREDICTED: Bemisia tabaci paired box protein Pax-6 (LOC109044746), transcript variant X1, mRNA	K08031	PAX6	paired box protein 6	http://www.genome.jp/dbget-bin/www_bget?ko:K08031	O73917	1046	3.1e-112	Paired box protein Pax-6 OS=Oryzias latipes GN=pax6 PE=2 SV=1	PF05920//PF00292//PF00046	Homeobox KN domain//'Paired box' domain//Homeobox domain	GO:0006355	regulation of transcription, DNA-templated	GO:0003677	DNA binding	--	--	KOG0849	Transcription factor PRD and related proteins, contain PAX and HOX domains
Cluster-35353.5438	zf-C2H2	Cluster-35353.5438	UP	5.1527	0.02568	1366	9738567	XP_018915548.1	930	1.4e-97	PREDICTED: zinc finger protein 358-like [Bemisia tabaci]	XM_019060003.1	XM_019060003	521	0	PREDICTED: Bemisia tabaci zinc finger protein 358-like (LOC109042992), mRNA	--	--	--	--	Q5JNZ3	189	4.4e-13	Zinc finger protein 311 OS=Homo sapiens GN=ZNF311 PE=2 SV=2	PF13912//PF05191//PF00096//PF16622//PF13465//PF01363	C2H2-type zinc finger//Adenylate kinase, active site lid//Zinc finger, C2H2 type//zinc-finger C2H2-type//Zinc-finger double domain//FYVE zinc finger	GO:0006144//GO:0046034	purine nucleobase metabolic process//ATP metabolic process	GO:0004017//GO:0046872	adenylate kinase activity//metal ion binding	--	--	--	--
Cluster-35353.5488	PAX	Cluster-35353.5488	UP	3.1157	0.010987	2186	9733752	XP_018905450.1	1666	1e-182	PREDICTED: homeobox protein GBX-1 [Bemisia tabaci]	XM_019049905.1	XM_019049905	1771	0	PREDICTED: Bemisia tabaci homeobox protein GBX-1 (LOC109036007), mRNA	K09321	GBX	homeobox protein GBX	http://www.genome.jp/dbget-bin/www_bget?ko:K09321	Q4V5A3	389	4.6e-36	Homeobox protein unplugged OS=Drosophila melanogaster GN=unpg PE=2 SV=1	PF00046	Homeobox domain	--	--	GO:0003677	DNA binding	--	--	--	--
Cluster-35353.58118	zf-C2H2	Cluster-35353.58118	UP	1.9393	0.022015	1154	9734297	XP_018906060.1	1174	6.1e-126	PREDICTED: enhancer of split mbeta protein-like [Bemisia tabaci]	XM_019050515.1	XM_019050515	992	0	PREDICTED: Bemisia tabaci enhancer of split mbeta protein-like (LOC109036344), mRNA	K06054	HES1	hairy and enhancer of split 1	http://www.genome.jp/dbget-bin/www_bget?ko:K06054	Q6PBD4	185	1.1e-12	Transcription factor HES-4 OS=Xenopus tropicalis GN=hes4 PE=2 SV=1	PF00010	Helix-loop-helix DNA-binding domain	--	--	GO:0046983	protein dimerization activity	--	--	KOG4304	Transcriptional repressors of the hairy/E(spl) family (contains HLH)
Cluster-35353.25393	Homeobox	Cluster-35353.25393	UP	4.2729	0.0072511	2225	9724883	XP_018895579.1	1697	2.7e-186	PREDICTED: dendritic arbor reduction protein 1-like [Bemisia tabaci]	XM_019040034.1	XM_019040034	2155	0	PREDICTED: Bemisia tabaci dendritic arbor reduction protein 1-like (LOC109029544), mRNA	K09206	KLF5	krueppel-like factor 5	http://www.genome.jp/dbget-bin/www_bget?ko:K09206	Q5VIY5	237	2e-18	Zinc finger protein 468 OS=Homo sapiens GN=ZNF468 PE=2 SV=1	--	--	--	--	--	--	--	--	--	--
Cluster-35353.61578	bHLH	Cluster-35353.61578	UP	2.8245	0.039672	1003	1713513	XP_002606745.1	237	2.4e-17	hypothetical protein BRAFLDRAFT_226054 [Branchiostoma floridae]	XM_019050862.1	XM_019050862	888	0	PREDICTED: Bemisia tabaci Krueppel-like factor 15 (LOC109036567), mRNA	K09210	KLF15	krueppel-like factor 15	http://www.genome.jp/dbget-bin/www_bget?ko:K09210	P58334	319	2.7e-28	Krueppel-like factor 16 OS=Mus musculus GN=Klf16 PE=2 SV=2	PF13465//PF00096//PF03145//PF02176//PF02892	Zinc-finger double domain//Zinc finger, C2H2 type//Seven in absentia protein family//TRAF-type zinc finger//BED zinc finger	GO:0006511//GO:0007275	ubiquitin-dependent protein catabolic process//multicellular organismal development	GO:0003677//GO:0046872//GO:0008270	DNA binding//metal ion binding//zinc ion binding	GO:0005634	nucleus	--	--
Cluster-35353.42947	zf-C2H2	Cluster-35353.42947	UP	3.3467	0.0034987	1864	9738910	XP_018915928.1	2174	1.1e-241	PREDICTED: transcription factor Sp9 isoform X1 [Bemisia tabaci]	XM_019060383.1	XM_019060383	1642	0	PREDICTED: Bemisia tabaci transcription factor Sp9 (LOC109043241), transcript variant X1, mRNA	K09199	SP9	transcription factor Sp9	http://www.genome.jp/dbget-bin/www_bget?ko:K09199	Q8VI67	637	6.8e-65	Transcription factor Sp7 OS=Mus musculus GN=Sp7 PE=1 SV=1	PF00096//PF13912//PF13465	Zinc finger, C2H2 type//C2H2-type zinc finger//Zinc-finger double domain	--	--	GO:0046872	metal ion binding	--	--	--	--
Cluster-35353.12647	zf-C2H2	Cluster-35353.12647	UP	4.5518	0.019313	1443	9736604	XP_018907919.1	1563	6e-171	PREDICTED: zinc finger protein 397-like [Bemisia tabaci]	XM_019052374.1	XM_019052374	1037	0	PREDICTED: Bemisia tabaci zinc finger protein 397-like (LOC109037612), mRNA	--	--	--	--	Q24206	209	2.2e-15	Broad-complex core protein isoform 6 OS=Drosophila melanogaster GN=br PE=1 SV=2	PF00651//PF00695	BTB/POZ domain//Major surface antigen from hepadnavirus	GO:0016032	viral process	GO:0005515	protein binding	--	--	--	--
Cluster-35353.56974	zf-C2H2	Cluster-35353.56974	UP	2.6486	0.041582	663	11538918	XP_023019716.1	182	3.8e-11	longitudinals lacking protein, isoforms A..B..D..L isoform X7 [Leptinotarsa decemlineata]	XM_019051659.1	XM_019051659	71	1.28e-26	PREDICTED: Bemisia tabaci longitudinals lacking protein, isoforms H/M/V-like (LOC109037149), transcript variant X4, mRNA	--	--	--	--	--	--	--	--	PF00096//PF13465	Zinc finger, C2H2 type//Zinc-finger double domain	--	--	GO:0046872	metal ion binding	--	--	--	--
Cluster-35353.16254	ZBTB	Cluster-35353.16254	UP	3.0092	0.013413	1986	9751881	XP_018908761.1	676	5.9e-68	PREDICTED: zinc finger protein 236-like [Bemisia tabaci]	XM_019047140.1	XM_019047140	1189	0	PREDICTED: Bemisia tabaci zinc finger protein 544-like (LOC109034145), mRNA	K09228	KRAB	KRAB domain-containing zinc finger protein	http://www.genome.jp/dbget-bin/www_bget?ko:K09228	Q6ZMW2	611	7.5e-62	Zinc finger protein 782 OS=Homo sapiens GN=ZNF782 PE=2 SV=1	--	--	--	--	--	--	--	--	--	--
Cluster-35353.54249	zf-C2H2	Cluster-35353.54249	DOWN	-1.8347	0.00080423	1449	9730786	XP_018902150.1	1233	1.1e-132	PREDICTED: uncharacterized protein LOC109033817 isoform X4 [Bemisia tabaci]	XM_019046605.1	XM_019046605	685	0	PREDICTED: Bemisia tabaci uncharacterized LOC109033817 (LOC109033817), transcript variant X5, mRNA	--	--	--	--	Q8BV42	317	6.7e-28	Zinc finger protein 786 OS=Mus musculus GN=Znf786 PE=2 SV=1	PF00096//PF13465	Zinc finger, C2H2 type//Zinc-finger double domain	--	--	GO:0046872	metal ion binding	--	--	--	--
Cluster-35353.47559	zf-C2H2	Cluster-35353.47559	UP	3.8076	0.030476	1722	9735136	XP_018912962.1	1271	5.2e-137	PREDICTED: homeobox protein OTX2-like isoform X2 [Bemisia tabaci]	XM_019057417.1	XM_019057417	1635	0	PREDICTED: Bemisia tabaci homeobox protein OTX2-like (LOC109041181), transcript variant X2, mRNA	K18490	OTX2	homeobox protein OTX2	http://www.genome.jp/dbget-bin/www_bget?ko:K18490	Q91981	345	4.6e-31	Homeobox protein OTX2 OS=Danio rerio GN=otx2 PE=2 SV=1	PF00046	Homeobox domain	--	--	GO:0003677	DNA binding	--	--	KOG2251	Homeobox transcription factor
Cluster-22071.1	zf-C2H2	Cluster-22071.1	DOWN	-2.2943	0.006196	4941	10753159	XP_022092993.1	924	2.6e-96	transforming protein p54..c-ets-1-like isoform X4 [Acanthaster planci]	XM_002912695.2	XM_002912695	3879	0	PREDICTED: Ailuropoda melanoleuca v-ets avian erythroblastosis virus E26 oncogene homolog 1 (ETS1), transcript variant X2, mRNA	K02678	ETS, pnt	c-ets proto-oncogene protein	http://www.genome.jp/dbget-bin/www_bget?ko:K02678	P14921	2274	2.7e-254	Protein C-ets-1 OS=Homo sapiens GN=ETS1 PE=1 SV=1	PF00447//PF02198//PF00178//PF00822//PF05241	HSF-type DNA-binding//Sterile alpha motif (SAM)/Pointed domain//Ets-domain//PMP-22/EMP/MP20/Claudin family//Emopamil binding protein	GO:0006694//GO:0006355//GO:0016125	steroid biosynthetic process//regulation of transcription, DNA-templated//sterol metabolic process	GO:0047750//GO:0003700//GO:0043565	cholestenol delta-isomerase activity//transcription factor activity, sequence-specific DNA binding//sequence-specific DNA binding	GO:0016021//GO:0005667//GO:0005634	integral component of membrane//transcription factor complex//nucleus	KOG3806	Predicted transcription factor
Cluster-35353.15154	Homeobox	Cluster-35353.15154	DOWN	-1.5364	0.0022454	1870	9751881	XP_018908761.1	1268	1.3e-136	PREDICTED: zinc finger protein 236-like [Bemisia tabaci]	XM_019041328.1	XM_019041328	1752	0	PREDICTED: Bemisia tabaci zinc finger protein 345-like (LOC109030389), transcript variant X1, mRNA	K09228	KRAB	KRAB domain-containing zinc finger protein	http://www.genome.jp/dbget-bin/www_bget?ko:K09228	P10076	1057	1.4e-113	Zinc finger protein 26 OS=Mus musculus GN=Zfp26 PE=2 SV=2	PF00096//PF13465//PF13912//PF10403//PF16622//PF02150	Zinc finger, C2H2 type//Zinc-finger double domain//C2H2-type zinc finger//Rad4 beta-hairpin domain 1//zinc-finger C2H2-type//RNA polymerases M/15 Kd subunit	GO:0006144//GO:0006206//GO:0006351	purine nucleobase metabolic process//pyrimidine nucleobase metabolic process//transcription, DNA-templated	GO:0046872//GO:0003677//GO:0003899	metal ion binding//DNA binding//DNA-directed RNA polymerase activity	GO:0005730	nucleolus	--	--
Cluster-35353.15607	ETS	Cluster-35353.15607	UP	4.7318	0.011209	522	9724703	XP_018918097.1	757	6.3e-78	PREDICTED: zinc finger protein SNAI2-like [Bemisia tabaci]	XM_019062552.1	XM_019062552	501	0	PREDICTED: Bemisia tabaci zinc finger protein SNAI2-like (LOC109044716), mRNA	--	--	--	--	--	--	--	--	PF13465//PF03453//PF00096//PF02892//PF13912	Zinc-finger double domain//MoeA N-terminal region (domain I and II)//Zinc finger, C2H2 type//BED zinc finger//C2H2-type zinc finger	GO:0032324	molybdopterin cofactor biosynthetic process	GO:0046872//GO:0003677	metal ion binding//DNA binding	--	--	--	--
Cluster-35353.11395	zf-C2H2	Cluster-35353.11395	UP	6.2792	0.00013236	2590	9738568	XP_018915549.1	2756	0	PREDICTED: forkhead box protein P1 isoform X1 [Bemisia tabaci]	XM_019060004.1	XM_019060004	2235	0	PREDICTED: Bemisia tabaci forkhead box protein P1 (LOC109042994), transcript variant X1, mRNA	--	--	--	--	Q9DBY0	673	6.3e-69	Forkhead box protein P4 OS=Mus musculus GN=Foxp4 PE=1 SV=1	PF04716//PF00250//PF05384	ETC complex I subunit conserved region//Forkhead domain//Sensor protein DegS	GO:0022904//GO:0006355//GO:0007165	respiratory electron transport chain//regulation of transcription, DNA-templated//signal transduction	GO:0016301//GO:0003700//GO:0016651//GO:0043565	kinase activity//transcription factor activity, sequence-specific DNA binding//oxidoreductase activity, acting on NAD(P)H//sequence-specific DNA binding	GO:0005743//GO:0005667	mitochondrial inner membrane//transcription factor complex	KOG4385	Predicted forkhead transcription factor
Cluster-35353.67930	zf-C2H2	Cluster-35353.67930	UP	4.8555	0.032348	987	9731015	XP_018902406.1	1134	2.3e-121	PREDICTED: homeobox protein Hox-A1-like [Bemisia tabaci]	XM_019046861.1	XM_019046861	852	0	PREDICTED: Bemisia tabaci homeobox protein Hox-A1-like (LOC109033973), mRNA	K09301	HOX_1	homeobox protein HoxA/B/D1	http://www.genome.jp/dbget-bin/www_bget?ko:K09301	P10105	328	2.4e-29	Homeotic protein labial OS=Drosophila melanogaster GN=lab PE=1 SV=2	PF05920//PF16035//PF00046	Homeobox KN domain//Chalcone isomerase like//Homeobox domain	GO:0006355	regulation of transcription, DNA-templated	GO:0016872//GO:0003677	intramolecular lyase activity//DNA binding	--	--	KOG0489	Transcription factor zerknullt and related HOX domain proteins
Cluster-36655.0	Fork head	Cluster-36655.0	UP	4.9273	0.024889	1164	9763909	XP_018909215.1	1146	1.1e-122	PREDICTED: paired box protein Pax-5-like isoform X6 [Bemisia tabaci]	XM_019053670.1	XM_019053670	1152	0	PREDICTED: Bemisia tabaci paired box protein Pax-5-like (LOC109038573), transcript variant X6, mRNA	K15608	PAX2	paired box protein 2	http://www.genome.jp/dbget-bin/www_bget?ko:K15608	O57685	593	5.4e-60	Paired box protein Pax-2-A OS=Xenopus laevis GN=pax2-a PE=2 SV=2	PF00292//PF03522//PF05053//PF01080	'Paired box' domain//Solute carrier family 12//Menin//Presenilin	GO:0006355//GO:0006811//GO:0006810	regulation of transcription, DNA-templated//ion transport//transport	GO:0004190//GO:0003677//GO:0005215	aspartic-type endopeptidase activity//DNA binding//transporter activity	GO:0016021//GO:0016020//GO:0005634	integral component of membrane//membrane//nucleus	--	--
Cluster-35353.13365	Homeobox	Cluster-35353.13365	DOWN	-1.8563	0.025346	2028	9765995	XP_018911550.1	766	2.2e-78	PREDICTED: gastrula zinc finger protein XlCGF46.1-like, partial [Bemisia tabaci]	--	--	--	--	--	K09228	KRAB	KRAB domain-containing zinc finger protein	http://www.genome.jp/dbget-bin/www_bget?ko:K09228	Q03938	316	1.2e-27	Zinc finger protein 90 OS=Homo sapiens GN=ZNF90 PE=2 SV=3	--	--	--	--	--	--	--	--	--	--
Cluster-9612.2	PAX	Cluster-9612.2	DOWN	-2.5979	0.0046883	1509	1893578	XP_002732435.1	432	8.8e-40	PREDICTED: nuclease-sensitive element-binding protein 1-like [Saccoglossus kowalevskii]	XM_843567.4	XM_843567	1464	0	PREDICTED: Canis lupus familiaris Y box binding protein 1 (YBX1), transcript variant X1, mRNA	K09276	YBX1, NSEP1	Y-box-binding protein 1	http://www.genome.jp/dbget-bin/www_bget?ko:K09276	P67809	933	2.6e-99	Nuclease-sensitive element-binding protein 1 OS=Homo sapiens GN=YBX1 PE=1 SV=3	--	--	--	--	--	--	--	--	KOG3070	Predicted RNA-binding protein containing PIN domain and invovled in translation or RNA processing
Cluster-35353.35064	zf-C2H2	Cluster-35353.35064	UP	3.6737	1.38e-08	3158	9729657	XP_018900894.1	2625	9.4e-294	PREDICTED: box A-binding factor-like isoform X5 [Bemisia tabaci]	XM_019045349.1	XM_019045349	2325	0	PREDICTED: Bemisia tabaci box A-binding factor-like (LOC109032980), transcript variant X5, mRNA	K09182	GATA1	GATA-binding protein 1	http://www.genome.jp/dbget-bin/www_bget?ko:K09182	P52172	276	8.4e-23	Box A-binding factor OS=Drosophila melanogaster GN=srp PE=1 SV=2	--	--	--	--	--	--	--	--	KOG1601	GATA-4/5/6 transcription factors
Cluster-35353.43607	CSD	Cluster-35353.43607	UP	1.7422	0.0034697	966	9729652	XP_018900888.1	1435	2.8e-156	PREDICTED: GATA zinc finger domain-containing protein 14-like [Bemisia tabaci]	XM_019045343.1	XM_019045343	924	0	PREDICTED: Bemisia tabaci GATA zinc finger domain-containing protein 14-like (LOC109032979), mRNA	K17895	GATA3	GATA-binding protein 3	http://www.genome.jp/dbget-bin/www_bget?ko:K17895	P52168	419	6.7e-40	GATA-binding factor A OS=Drosophila melanogaster GN=pnr PE=1 SV=1	PF01873//PF00320//PF08273	Domain found in IF2B/IF5//GATA zinc finger//Zinc-binding domain of primase-helicase	GO:0006269//GO:0006446//GO:0006413//GO:0006355//GO:0006351	DNA replication, synthesis of RNA primer//regulation of translational initiation//translational initiation//regulation of transcription, DNA-templated//transcription, DNA-templated	GO:0003700//GO:0003743//GO:0004386//GO:0008270//GO:0003896//GO:0043565	transcription factor activity, sequence-specific DNA binding//translation initiation factor activity//helicase activity//zinc ion binding//DNA primase activity//sequence-specific DNA binding	GO:0005657//GO:0005730//GO:0005840//GO:0005667	replication fork//nucleolus//ribosome//transcription factor complex	KOG1601	GATA-4/5/6 transcription factors
Cluster-29762.0	zf-GATA	Cluster-29762.0	DOWN	-2.8593	0.0081147	2979	9926637	XP_019644518.1	457	2.2e-42	PREDICTED: transcription factor 7-like 2 isoform X3 [Branchiostoma belcheri]	XM_004744974.2	XM_004744974	2058	0	PREDICTED: Mustela putorius furo transcription factor 7 (T-cell specific, HMG-box) (TCF7), transcript variant X2, mRNA	K02620	TCF7	transcription factor 7	http://www.genome.jp/dbget-bin/www_bget?ko:K02620	Q00417	1206	1.1e-130	Transcription factor 7 OS=Mus musculus GN=Tcf7 PE=2 SV=2	--	--	--	--	--	--	--	--	KOG3248	Transcription factor TCF-4
Cluster-29726.0	HMG	Cluster-29726.0	DOWN	-3.5704	0.014369	1477	9924849	XP_019642520.1	701	5.5e-71	PREDICTED: upstream stimulatory factor-like isoform X4 [Branchiostoma belcheri]	XM_013062830.1	XM_013062830	1283	0	PREDICTED: Mustela putorius furo upstream transcription factor 2, c-fos interacting (USF2), mRNA	K09106	USF	upstream stimulatory factor	http://www.genome.jp/dbget-bin/www_bget?ko:K09106	Q15853	1437	9.2e-158	Upstream stimulatory factor 2 OS=Homo sapiens GN=USF2 PE=1 SV=1	PF06156//PF13851//PF04111//PF00010//PF01166//PF10186//PF06005	Protein of unknown function (DUF972)//Growth-arrest specific micro-tubule binding//Autophagy protein Apg6//Helix-loop-helix DNA-binding domain//TSC-22/dip/bun family//Vacuolar sorting 38 and autophagy-related subunit 14//Protein of unknown function (DUF904)	GO:0043093//GO:0010508//GO:0006260//GO:0048870//GO:0006355//GO:0006914//GO:0000917	FtsZ-dependent cytokinesis//positive regulation of autophagy//DNA replication//cell motility//regulation of transcription, DNA-templated//autophagy//barrier septum assembly	GO:0003700//GO:0046983	transcription factor activity, sequence-specific DNA binding//protein dimerization activity	GO:0005737//GO:0005667//GO:0031514	cytoplasm//transcription factor complex//motile cilium	KOG1318	Helix loop helix transcription factor EB
Cluster-22589.0	bHLH	Cluster-22589.0	DOWN	-5.9144	0.0034427	1052	1134649	EDV21843.1	253	3.5e-19	hypothetical protein TRIADDRAFT_14905, partial [Trichoplax adhaerens]	XM_008705394.1	XM_008705394	983	0	PREDICTED: Ursus maritimus Kruppel-like factor 6 (KLF6), mRNA	K09207	KLF6_7	krueppel-like factor 6/7	http://www.genome.jp/dbget-bin/www_bget?ko:K09207	Q99612	1226	1.9e-133	Krueppel-like factor 6 OS=Homo sapiens GN=KLF6 PE=1 SV=3	PF13465//PF00096	Zinc-finger double domain//Zinc finger, C2H2 type	--	--	GO:0046872	metal ion binding	--	--	KOG1721	FOG: Zn-finger
Cluster-35353.15217	zf-C2H2	Cluster-35353.15217	UP	1.2278	7.12e-12	8397	9722606	XP_018906289.1	2312	4.9e-257	PREDICTED: zinc finger MIZ domain-containing protein 1 isoform X2 [Bemisia tabaci]	XM_019050744.1	XM_019050744	6220	0	PREDICTED: Bemisia tabaci zinc finger MIZ domain-containing protein 1 (LOC109036486), transcript variant X2, mRNA	--	--	--	--	Q6P1E1	1269	1.6e-137	Zinc finger MIZ domain-containing protein 1 OS=Mus musculus GN=Zmiz1 PE=2 SV=1	PF08107//PF02891//PF11789	Pleurocidin family//MIZ/SP-RING zinc finger//Zinc-finger of the MIZ type in Nse subunit	GO:0042742	defense response to bacterium	GO:0008270	zinc ion binding	--	--	KOG2169	Zn-finger transcription factor

## Sheet: AM vs VM
tf_id	tf_Family	gene_id	UP_DOWN_REGULATION(MI vs MU)	log2FC(MI vs MU)	q value(MI vs MU)	Gene Length	NR GI	NR ID	NR Score	NR Evalue	NR Description	NT GI	NT ID	NT Score	NT Evalue	NT Description	KO ID	KO Name	KO Description	Http Link	Swissprot ID	Swissprot Score	Swissprot Evalue	Swissprot Description	PFAM ID	PFAM description	Gene Ontology Biological Pathway	BP Description	Gene Ontology Molecular Function	MF Description	Gene Ontology Cellular Component	CC Description	KOG ID	KOG Description	UP_DOWN_REGULATION(AvsC)	log2FC(AvsC)	q value(AvsC)	UP_DOWN_REGULATION(AvsD)	log2FC(AvsD)	q value(AvsD)	UP_DOWN_REGULATION(CvsF)	log2FC(CvsF)	q value(CvsF)	UP_DOWN_REGULATION(AvsB)	log2FC(AvsB)	q value(AvsB)	UP_DOWN_REGULATION(BvsC)	log2FC(BvsC)	q value(BvsC)
Cluster-35353.61689	ARID	Cluster-35353.61689	DOWN	-1.0521	0.026344	8590	9725454	XP_018896219.1	3287	0	PREDICTED: uncharacterized protein LOC109029950 [Bemisia tabaci]	XM_019040674.1	XM_019040674	4418	0	PREDICTED: Bemisia tabaci uncharacterized LOC109029950 (LOC109029950), mRNA	K11478	JARID2, JMJ	protein Jumonji	http://www.genome.jp/dbget-bin/www_bget?ko:K11478	Q92833	567	4.1e-56	Protein Jumonji OS=Homo sapiens GN=JARID2 PE=1 SV=2	PF04790//PF01388	Sarcoglycan complex subunit protein//ARID/BRIGHT DNA binding domain	--	--	GO:0003677	DNA binding	GO:0016012//GO:0016021	sarcoglycan complex//integral component of membrane	KOG1246	DNA-binding protein jumonji/RBP2/SMCY, contains JmjC domain	FALSE	0.04394	0.96522	FALSE	-0.37156	0.10628	DOWN	-1.0521	0.026344	FALSE	0.26635	0.71665	FALSE	-0.17535	0.92302
Cluster-35353.34842	bHLH	Cluster-35353.34842	UP	2.7212	0.0015709	1912	9764360	XP_018909715.1	1535	1.4e-167	PREDICTED: protein dead ringer homolog isoform X1 [Bemisia tabaci]	XM_019054170.1	XM_019054170	1757	0	PREDICTED: Bemisia tabaci protein dead ringer homolog (LOC109038905), transcript variant X1, mRNA	--	--	--	--	Q24573	669	1.4e-68	Protein dead ringer OS=Drosophila melanogaster GN=retn PE=1 SV=2	PF01388//PF00514	ARID/BRIGHT DNA binding domain//Armadillo/beta-catenin-like repeat	--	--	GO:0003677//GO:0005515	DNA binding//protein binding	--	--	KOG2744	DNA-binding proteins Bright/BRCAA1/RBP1 and related proteins containing BRIGHT domain	FALSE	-0.40848	0.88862	UP	2.1984	0.0010213	UP	2.7212	0.0015709	FALSE	-0.43105	0.83134	FALSE	0.076838	0.96893
Cluster-35353.54812	C/EBP	Cluster-35353.54812	UP	1.1154	0.0011055	2090	9731137	XP_018902541.1	736	6.9e-75	PREDICTED: protein extra-macrochaetae [Bemisia tabaci]	XM_019046996.1	XM_019046996	2059	0	PREDICTED: Bemisia tabaci protein extra-macrochaetae (LOC109034062), mRNA	K17696	EMC	DNA-binding protein inhibitor ID, other	http://www.genome.jp/dbget-bin/www_bget?ko:K17696	P18491	222	1e-16	Protein extra-macrochaetae OS=Drosophila melanogaster GN=emc PE=2 SV=2	PF00813//PF00010	FliP family//Helix-loop-helix DNA-binding domain	GO:0009306	protein secretion	GO:0046983	protein dimerization activity	GO:0016020	membrane	--	--	FALSE	-0.44321	0.42812	FALSE	0.78877	4.97e-06	UP	1.1154	0.0011055	FALSE	0.089456	0.96628	FALSE	-0.48238	0.30818
Cluster-35353.32963	CP2	Cluster-35353.32963	UP	1.598	0.00010527	2508	9735196	XP_018913029.1	1919	5.5e-212	PREDICTED: hairy..enhancer-of-split related with YRPW motif protein 1 [Bemisia tabaci]	XM_019057484.1	XM_019057484	2045	0	PREDICTED: Bemisia tabaci hairy/enhancer-of-split related with YRPW motif protein 1 (LOC109041224), mRNA	K09091	HEY	hairy and enhancer of split related with YRPW motif	http://www.genome.jp/dbget-bin/www_bget?ko:K09091	Q9C0J9	189	8.1e-13	Class E basic helix-loop-helix protein 41 OS=Homo sapiens GN=BHLHE41 PE=1 SV=1	--	--	--	--	--	--	--	--	--	--	FALSE	-0.78813	0.28981	FALSE	0.84043	0.00035411	UP	1.598	0.00010527	FALSE	0.12417	0.96628	FALSE	-0.86075	0.1084
Cluster-35353.50410	CSD	Cluster-35353.50410	UP	1.2085	0.0017114	2087	9721556	XP_018917619.1	723	2.2e-73	PREDICTED: enhancer of split mbeta protein-like [Bemisia tabaci]	XM_019062074.1	XM_019062074	2010	0	PREDICTED: Bemisia tabaci enhancer of split mbeta protein-like (LOC109044365), mRNA	K06054	HES1	hairy and enhancer of split 1	http://www.genome.jp/dbget-bin/www_bget?ko:K06054	Q01069	398	3.9e-37	Enhancer of split mbeta protein OS=Drosophila melanogaster GN=HLHmbeta PE=2 SV=2	PF07527//PF00010	Hairy Orange//Helix-loop-helix DNA-binding domain	GO:0006355	regulation of transcription, DNA-templated	GO:0003677//GO:0046983	DNA binding//protein dimerization activity	--	--	--	--	FALSE	-0.2972	0.80327	FALSE	0.67924	0.001262	UP	1.2085	0.0017114	FALSE	0.22169	0.76668	FALSE	-0.46874	0.47494
Cluster-35353.43652	CUT	Cluster-35353.43652	UP	1.9817	2.56e-05	2937	9724185	XP_018917519.1	3603	0	PREDICTED: protein cycle isoform X1 [Bemisia tabaci]	XM_019061974.1	XM_019061974	2586	0	PREDICTED: Bemisia tabaci protein cycle (LOC109044315), transcript variant X4, mRNA	K02296	ARNTL, BMAL1, CYC	aryl hydrocarbon receptor nuclear translocator-like protein 1	http://www.genome.jp/dbget-bin/www_bget?ko:K02296	Q6YGZ5	1255	2.3e-136	Aryl hydrocarbon receptor nuclear translocator-like protein 1 OS=Tyto alba GN=ARNTL PE=2 SV=1	PF11575//PF08447//PF00989//PF08446//PF00010	FhuF 2Fe-2S C-terminal domain//PAS fold//PAS fold//PAS fold//Helix-loop-helix DNA-binding domain	GO:0006355	regulation of transcription, DNA-templated	GO:0051537//GO:0005515//GO:0046983	2 iron, 2 sulfur cluster binding//protein binding//protein dimerization activity	--	--	KOG3561	Aryl-hydrocarbon receptor nuclear translocator	FALSE	0.3337	0.84267	UP	1.9884	1.1e-15	UP	1.9817	2.56e-05	FALSE	-0.16845	0.96628	FALSE	0.54973	0.44808
Cluster-35353.56610	DM	Cluster-35353.56610	UP	2.2566	1.51e-07	2028	9765987	XP_018911542.1	1663	2.1e-182	PREDICTED: protein hairy-like [Bemisia tabaci]	XM_019055997.1	XM_019055997	1902	0	PREDICTED: Bemisia tabaci protein hairy-like (LOC109040174), mRNA	K09090	HESN	hairy and enhancer of split, invertebrate	http://www.genome.jp/dbget-bin/www_bget?ko:K09090	P14003	510	3.9e-50	Protein hairy OS=Drosophila melanogaster GN=h PE=1 SV=2	PF07527//PF00010	Hairy Orange//Helix-loop-helix DNA-binding domain	GO:0006355	regulation of transcription, DNA-templated	GO:0046983//GO:0003677	protein dimerization activity//DNA binding	--	--	--	--	FALSE	-0.81742	0.20439	UP	1.3772	3.7e-06	UP	2.2566	1.51e-07	FALSE	-0.29843	0.72547	FALSE	-0.46655	0.6008
Cluster-35353.52945	ETS	Cluster-35353.52945	UP	3.3808	8.77e-07	2159	9766003	XP_018911558.1	1441	1.3e-156	PREDICTED: transcription factor HES-1-like isoform X1 [Bemisia tabaci]	XM_019056013.1	XM_019056013	1605	0	PREDICTED: Bemisia tabaci transcription factor HES-1-like (LOC109040189), transcript variant X1, mRNA	K09089	HES4	hairy and enhancer of split 4	http://www.genome.jp/dbget-bin/www_bget?ko:K09089	P35428	306	1.9e-26	Transcription factor HES-1 OS=Mus musculus GN=Hes1 PE=1 SV=1	PF00010//PF06432//PF07527	Helix-loop-helix DNA-binding domain//Phosphatidylinositol N-acetylglucosaminyltransferase//Hairy Orange	GO:0006506//GO:0006355	GPI anchor biosynthetic process//regulation of transcription, DNA-templated	GO:0003677//GO:0046983//GO:0017176	DNA binding//protein dimerization activity//phosphatidylinositol N-acetylglucosaminyltransferase activity	GO:0016021	integral component of membrane	KOG4304	Transcriptional repressors of the hairy/E(spl) family (contains HLH)	FALSE	-0.0034387	0.99574	UP	4.4601	7.72e-11	UP	3.3808	8.77e-07	FALSE	-0.17908	0.96628	FALSE	0.22217	0.89845
Cluster-35353.62197	Fork head	Cluster-35353.62197	UP	2.509	0.0062499	2600	9735405	XP_018913263.1	736	8.5e-75	PREDICTED: class E basic helix-loop-helix protein 22-like [Bemisia tabaci]	XM_019057717.1	XM_019057717	989	0	PREDICTED: Bemisia tabaci class E basic helix-loop-helix protein 22-like (LOC109041373), transcript variant X1, mRNA	K09086	BHLHB4_5, BETA	class B basic helix-loop-helix protein 4/5	http://www.genome.jp/dbget-bin/www_bget?ko:K09086	Q8NFJ8	305	3e-26	Class E basic helix-loop-helix protein 22 OS=Homo sapiens GN=BHLHE22 PE=2 SV=1	PF00010	Helix-loop-helix DNA-binding domain	--	--	GO:0046983	protein dimerization activity	--	--	KOG3898	Transcription factor NeuroD and related HTH proteins	FALSE	0.29293	0.92174	UP	2.3633	4.16e-05	UP	2.509	0.0062499	UP	1.0729	0.046128	FALSE	-0.7345	0.48761
Cluster-35353.29340	HMG	Cluster-35353.29340	UP	2.7379	0.0012072	1081	9731294	XP_018902718.1	737	2.7e-75	PREDICTED: proline-rich extensin-like protein EPR1 [Bemisia tabaci]	XM_019047173.1	XM_019047173	600	0	PREDICTED: Bemisia tabaci proline-rich extensin-like protein EPR1 (LOC109034171), mRNA	K09084	ATOH8	atonal protein 8	http://www.genome.jp/dbget-bin/www_bget?ko:K09084	Q96SQ7	257	4.6e-21	Protein atonal homolog 8 OS=Homo sapiens GN=ATOH8 PE=2 SV=2	PF01192//PF00010	RNA polymerase Rpb6//Helix-loop-helix DNA-binding domain	GO:0006144//GO:0006351//GO:0006206	purine nucleobase metabolic process//transcription, DNA-templated//pyrimidine nucleobase metabolic process	GO:0003677//GO:0046983//GO:0003899	DNA binding//protein dimerization activity//DNA-directed RNA polymerase activity	GO:0005730	nucleolus	--	--	FALSE	-0.24681	0.93526	UP	3.1093	9.43e-07	UP	2.7379	0.0012072	FALSE	0.17534	0.96628	FALSE	-0.36461	0.89432
Cluster-35353.59667	Homeobox	Cluster-35353.59667	UP	1.2098	0.0017802	2825	9737538	XP_018914388.1	631	1.4e-62	PREDICTED: CCAAT..enhancer-binding protein gamma [Bemisia tabaci]	XM_019058843.1	XM_019058843	2523	0	PREDICTED: Bemisia tabaci CCAAT/enhancer-binding protein gamma (LOC109042208), mRNA	--	--	--	--	P53567	185	2.7e-12	CCAAT/enhancer-binding protein gamma OS=Homo sapiens GN=CEBPG PE=1 SV=1	PF04977//PF07716//PF00170//PF01763	Septum formation initiator//Basic region leucine zipper//bZIP transcription factor//Herpesvirus UL6 like	GO:0006323//GO:0007049//GO:0006355	DNA packaging//cell cycle//regulation of transcription, DNA-templated	GO:0003700//GO:0043565	transcription factor activity, sequence-specific DNA binding//sequence-specific DNA binding	GO:0005667	transcription factor complex	KOG3119	Basic region leucine zipper transcription factor	FALSE	0.066786	0.95402	UP	1.3518	4.79e-15	UP	1.2098	0.0017802	FALSE	-0.148	0.89675	FALSE	0.26332	0.77526
Cluster-35353.65216	HSF	Cluster-35353.65216	UP	2.5947	0.015474	1847	9724257	XP_018917599.1	1254	5.2e-135	PREDICTED: CCAAT..enhancer-binding protein [Bemisia tabaci]	XM_019062054.1	XM_019062054	1716	0	PREDICTED: Bemisia tabaci CCAAT/enhancer-binding protein (LOC109044351), mRNA	K10052	CEBPN	CCAAT/enhancer binding protein (C/EBP), invertebrate	http://www.genome.jp/dbget-bin/www_bget?ko:K10052	Q05826	231	8.1e-18	CCAAT/enhancer-binding protein beta OS=Gallus gallus GN=CEBPB PE=1 SV=1	PF07716//PF00170//PF03131	Basic region leucine zipper//bZIP transcription factor//bZIP Maf transcription factor	GO:0006355	regulation of transcription, DNA-templated	GO:0003677//GO:0043565//GO:0003700	DNA binding//sequence-specific DNA binding//transcription factor activity, sequence-specific DNA binding	GO:0005667//GO:0005634	transcription factor complex//nucleus	KOG3119	Basic region leucine zipper transcription factor	FALSE	-0.54	0.86802	UP	3.0936	0.0010826	UP	2.5947	0.015474	FALSE	-0.74156	0.58061	FALSE	0.24871	0.92302
Cluster-35353.50457	HTH	Cluster-35353.50457	UP	1.2637	0.0079213	2298	9732279	XP_018903812.1	2350	5.3e-262	PREDICTED: transcription factor CP2-like protein 1 isoform X1 [Bemisia tabaci]	XM_019048267.1	XM_019048267	2256	0	PREDICTED: Bemisia tabaci transcription factor CP2-like protein 1 (LOC109034881), transcript variant X2, mRNA	K09275	TFCP2	transcription factor CP2 and related proteins	http://www.genome.jp/dbget-bin/www_bget?ko:K09275	Q811S7	668	2.1e-68	Upstream-binding protein 1 OS=Mus musculus GN=Ubp1 PE=1 SV=1	--	--	--	--	--	--	--	--	KOG4091	Transcription factor	FALSE	0.52566	0.28193	UP	1.1832	1.42e-05	UP	1.2637	0.0079213	FALSE	-0.16464	0.96628	FALSE	0.73893	0.079652
Cluster-35353.36604	MBD	Cluster-35353.36604	UP	3.124	2.14e-20	796	5394880	XP_011503978.1	256	1.2e-19	PREDICTED: glycine-rich protein 2 [Ceratosolen solmsi marchali]	--	--	--	--	--	K18754	LIN28	protein lin-28	http://www.genome.jp/dbget-bin/www_bget?ko:K18754	Q89A90	257	3.4e-21	Cold shock-like protein CspE OS=Buchnera aphidicola subsp. Baizongia pistaciae (strain Bp) GN=cspE PE=3 SV=3	PF00313	'Cold-shock' DNA-binding domain	GO:0006355	regulation of transcription, DNA-templated	GO:0003677	DNA binding	--	--	KOG3070	Predicted RNA-binding protein containing PIN domain and invovled in translation or RNA processing	FALSE	-0.24186	0.88554	UP	1.9206	3.48e-20	UP	3.124	2.14e-20	FALSE	-0.11764	0.96628	FALSE	-0.072616	0.94722
Cluster-35353.11866	MH1	Cluster-35353.11866	UP	1.9181	0.0037417	6194	9765975	XP_018911528.1	3910	0	PREDICTED: homeobox protein cut isoform X4 [Bemisia tabaci]	XM_019055983.1	XM_019055983	2758	0	PREDICTED: Bemisia tabaci homeobox protein cut (LOC109040165), transcript variant X5, mRNA	K09313	CUTL	homeobox protein cut-like	http://www.genome.jp/dbget-bin/www_bget?ko:K09313	P10180	815	5.2e-85	Homeobox protein cut OS=Drosophila melanogaster GN=ct PE=1 SV=1	PF00046//PF05920//PF01585//PF10473//PF00781//PF02376//PF10186	Homeobox domain//Homeobox KN domain//G-patch domain//Leucine-rich repeats of kinetochore protein Cenp-F/LEK1//Diacylglycerol kinase catalytic domain//CUT domain//Vacuolar sorting 38 and autophagy-related subunit 14	GO:0006355//GO:0010508	regulation of transcription, DNA-templated//positive regulation of autophagy	GO:0003676//GO:0045502//GO:0003677//GO:0008134//GO:0016301//GO:0042803	nucleic acid binding//dynein binding//DNA binding//transcription factor binding//kinase activity//protein homodimerization activity	GO:0005667//GO:0030286	transcription factor complex//dynein complex	KOG2252	CCAAT displacement protein and related homeoproteins	FALSE	0.42434	0.66965	UP	2.5652	5.16e-12	UP	1.9181	0.0037417	FALSE	0.12392	0.96628	FALSE	0.3467	0.7724
Cluster-35353.11192	PAX	Cluster-35353.11192	UP	2.9641	0.046887	3132	9730685	XP_018902034.1	2398	2e-267	PREDICTED: hepatocyte nuclear factor 6 [Bemisia tabaci]	XM_019046489.1	XM_019046489	2959	0	PREDICTED: Bemisia tabaci hepatocyte nuclear factor 6 (LOC109033735), mRNA	K08026	ONECUT1, HNF6	one cut domain, family member 1, hepatocyte nuclear factor 6	http://www.genome.jp/dbget-bin/www_bget?ko:K08026	Q9UBC0	743	5.8e-77	Hepatocyte nuclear factor 6 OS=Homo sapiens GN=ONECUT1 PE=2 SV=1	PF02376//PF14999//PF00046//PF05920//PF01213	CUT domain//Shadow of prion protein, neuroprotective//Homeobox domain//Homeobox KN domain//Adenylate cyclase associated (CAP) N terminal	GO:0006355//GO:0007010	regulation of transcription, DNA-templated//cytoskeleton organization	GO:0003677//GO:0003779	DNA binding//actin binding	GO:0031225	anchored component of membrane	KOG2252	CCAAT displacement protein and related homeoproteins	FALSE	-0.55104	0.88554	UP	4.2995	0.0073618	UP	2.9641	0.046887	FALSE	-0.66962	0.9089	FALSE	0.16767	0.9523
Cluster-35353.51804	Pou	Cluster-35353.51804	UP	2.351	0.0061837	2554	9722297	XP_018902896.1	945	4.9e-99	PREDICTED: doublesex- and mab-3-related transcription factor 1-like isoform X2 [Bemisia tabaci]	XM_019047351.1	XM_019047351	812	0	PREDICTED: Bemisia tabaci doublesex- and mab-3-related transcription factor 1-like (LOC109034288), transcript variant X2, mRNA	--	--	--	--	P23023	166	3.9e-10	Protein doublesex OS=Drosophila melanogaster GN=dsx PE=1 SV=1	--	--	--	--	--	--	--	--	KOG3815	Transcription factor Doublesex	FALSE	0.28459	0.92564	UP	2.7794	4.52e-05	UP	2.351	0.0061837	FALSE	-0.003981	0.99739	FALSE	0.3357	0.89521
Cluster-35353.54334	RXR-like	Cluster-35353.54334	UP	1.9714	4.25e-06	2771	9732199	XP_018903725.1	2188	3.9e-243	PREDICTED: ets DNA-binding protein pokkuri isoform X1 [Bemisia tabaci]	XM_019048180.1	XM_019048180	2619	0	PREDICTED: Bemisia tabaci ets DNA-binding protein pokkuri (LOC109034819), transcript variant X1, mRNA	K03211	ETV6_7, yan	ETS translocation variant 6/7	http://www.genome.jp/dbget-bin/www_bget?ko:K03211	Q01842	509	7e-50	Ets DNA-binding protein pokkuri OS=Drosophila melanogaster GN=aop PE=1 SV=2	PF00178//PF02198	Ets-domain//Sterile alpha motif (SAM)/Pointed domain	GO:0006355	regulation of transcription, DNA-templated	GO:0043565//GO:0003700	sequence-specific DNA binding//transcription factor activity, sequence-specific DNA binding	GO:0005667//GO:0005634	transcription factor complex//nucleus	KOG3804	Transcription factor NERF and related proteins, contain ETS domain	FALSE	-0.031021	0.96965	UP	2.0499	3.64e-18	UP	1.9714	4.25e-06	FALSE	0.070494	0.96628	FALSE	-0.053482	0.96893
Cluster-35353.49645	T-box	Cluster-35353.49645	UP	1.4277	0.0043261	1555	9729003	XP_018900172.1	1386	2.2e-150	PREDICTED: uncharacterized protein LOC109032475 [Bemisia tabaci]	XM_019044627.1	XM_019044627	889	0	PREDICTED: Bemisia tabaci uncharacterized LOC109032475 (LOC109032475), mRNA	K09431	ETV1	ets translocation variant 1	http://www.genome.jp/dbget-bin/www_bget?ko:K09431	Q2KIC2	286	2.9e-24	ETS translocation variant 1 OS=Bos taurus GN=ETV1 PE=2 SV=1	PF00178	Ets-domain	GO:0006355	regulation of transcription, DNA-templated	GO:0043565//GO:0003700	sequence-specific DNA binding//transcription factor activity, sequence-specific DNA binding	GO:0005667	transcription factor complex	--	--	FALSE	-0.82843	0.20853	FALSE	0.014167	0.9686	UP	1.4277	0.0043261	FALSE	0.12857	0.96628	FALSE	-0.90446	0.12461
Cluster-35353.10862	TF_bZIP	Cluster-35353.10862	UP	3.7576	0.042786	2040	9727115	XP_018898048.1	1302	1.6e-140	PREDICTED: transcriptional regulator ERG homolog isoform X2 [Bemisia tabaci]	XM_019042503.1	XM_019042503	1813	0	PREDICTED: Bemisia tabaci transcriptional regulator ERG homolog (LOC109031151), transcript variant X2, mRNA	K09436	FLI1	friend leukemia integration 1 transcription factor	http://www.genome.jp/dbget-bin/www_bget?ko:K09436	P29774	784	6.7e-82	DNA-binding protein D-ETS-3 OS=Drosophila melanogaster GN=Ets65A PE=2 SV=3	PF16045//PF00447//PF00178	LisH//HSF-type DNA-binding//Ets-domain	GO:0006355	regulation of transcription, DNA-templated	GO:0005515//GO:0003700//GO:0043565	protein binding//transcription factor activity, sequence-specific DNA binding//sequence-specific DNA binding	GO:0005634//GO:0005667	nucleus//transcription factor complex	KOG3806	Predicted transcription factor	FALSE	0.026167	0.9838	UP	5.442	0.00081001	UP	3.7576	0.042786	FALSE	0.25165	0.96628	FALSE	-0.17865	0.94098
Cluster-35353.35806	THAP	Cluster-35353.35806	UP	1.2836	0.024069	2234	9736205	XP_018907480.1	2655	2.2e-297	PREDICTED: uncharacterized protein LOC109037335 [Bemisia tabaci]	XM_019051935.1	XM_019051935	1915	0	PREDICTED: Bemisia tabaci uncharacterized LOC109037335 (LOC109037335), mRNA	K09396	FOXC	forkhead box protein C	http://www.genome.jp/dbget-bin/www_bget?ko:K09396	Q9PVY8	363	4.8e-33	Forkhead box protein C2-B OS=Xenopus laevis GN=foxc2-b PE=2 SV=2	PF00250	Forkhead domain	GO:0006355	regulation of transcription, DNA-templated	GO:0043565//GO:0003700	sequence-specific DNA binding//transcription factor activity, sequence-specific DNA binding	GO:0005667	transcription factor complex	--	--	FALSE	-0.50661	0.74051	FALSE	0.54085	0.0050239	UP	1.2836	0.024069	FALSE	-0.064836	0.96628	FALSE	-0.38797	0.84482
Cluster-35353.52391	THR-like	Cluster-35353.52391	UP	1.6051	7.11e-06	3239	9739406	XP_018916479.1	2925	0	PREDICTED: forkhead box protein K1 isoform X2 [Bemisia tabaci]	XM_019060934.1	XM_019060934	3145	0	PREDICTED: Bemisia tabaci forkhead box protein K1 (LOC109043648), transcript variant X2, mRNA	K09404	FOXK	forkhead box protein K	http://www.genome.jp/dbget-bin/www_bget?ko:K09404	P85037	579	6.3e-58	Forkhead box protein K1 OS=Homo sapiens GN=FOXK1 PE=1 SV=1	PF00250//PF00498	Forkhead domain//FHA domain	GO:0006355	regulation of transcription, DNA-templated	GO:0005515//GO:0003700//GO:0043565	protein binding//transcription factor activity, sequence-specific DNA binding//sequence-specific DNA binding	GO:0005667	transcription factor complex	KOG2294	Transcription factor of the Forkhead/HNF3 family	FALSE	0.23351	0.86568	UP	1.9629	6.34e-26	UP	1.6051	7.11e-06	FALSE	0.10461	0.96628	FALSE	0.1783	0.89182
Cluster-35353.18591	Tub	Cluster-35353.18591	UP	1.4251	0.0037733	3268	9736328	XP_018907616.1	1347	1.5e-145	PREDICTED: forkhead box protein O isoform X2 [Bemisia tabaci]	XM_019052070.1	XM_019052070	3154	0	PREDICTED: Bemisia tabaci forkhead box protein O (LOC109037412), transcript variant X1, mRNA	K12358	FOXO4	forkhead box protein O4	http://www.genome.jp/dbget-bin/www_bget?ko:K12358	Q95V55	721	2.2e-74	Forkhead box protein O OS=Drosophila melanogaster GN=foxo PE=1 SV=1	--	--	--	--	--	--	--	--	KOG2294	Transcription factor of the Forkhead/HNF3 family	FALSE	-0.87082	0.15573	UP	1.4667	2.34e-10	UP	1.4251	0.0037733	FALSE	-0.20383	0.78338	FALSE	-0.61465	0.39547
Cluster-35353.35774	ZBTB	Cluster-35353.35774	UP	2.9744	9.69e-14	3718	9765282	XP_018910750.1	1912	5.3e-211	PREDICTED: forkhead box protein N2-like [Bemisia tabaci]	XM_019055205.1	XM_019055205	3401	0	PREDICTED: Bemisia tabaci forkhead box protein N2-like (LOC109039629), mRNA	K09396	FOXC	forkhead box protein C	http://www.genome.jp/dbget-bin/www_bget?ko:K09396	Q68F77	355	6.8e-32	Forkhead box protein C1 OS=Xenopus tropicalis GN=foxc1 PE=2 SV=1	PF00250//PF15088	Forkhead domain//NADH dehydrogenase [ubiquinone] 1 subunit C1, mitochondrial	GO:0006355	regulation of transcription, DNA-templated	GO:0003700//GO:0043565	transcription factor activity, sequence-specific DNA binding//sequence-specific DNA binding	GO:0005747//GO:0005739//GO:0005667	mitochondrial respiratory chain complex I//mitochondrion//transcription factor complex	--	--	FALSE	-0.97311	0.057332	UP	2.6275	1.03e-19	UP	2.9744	9.69e-14	FALSE	-0.41526	0.10456	FALSE	-0.50635	0.50765
Cluster-35353.43013	zf-C2H2	Cluster-35353.43013	UP	1.2821	0.01576	1431	9727804	XP_018898830.1	540	2.5e-52	PREDICTED: uncharacterized protein LOC109031643 isoform X2 [Bemisia tabaci]	XM_019043285.1	XM_019043285	271	1.89e-137	PREDICTED: Bemisia tabaci uncharacterized LOC109031643 (LOC109031643), transcript variant X2, mRNA	K09403	FOXJ2_3	forkhead box protein J2/3	http://www.genome.jp/dbget-bin/www_bget?ko:K09403	Q28EM1	201	1.9e-14	Forkhead box protein J2 OS=Xenopus tropicalis GN=foxj2 PE=2 SV=1	PF00250	Forkhead domain	GO:0006355	regulation of transcription, DNA-templated	GO:0043565//GO:0003700	sequence-specific DNA binding//transcription factor activity, sequence-specific DNA binding	GO:0005667	transcription factor complex	KOG2294	Transcription factor of the Forkhead/HNF3 family	FALSE	0.60783	0.26124	FALSE	0.12895	0.90345	UP	1.2821	0.01576	FALSE	0.18575	0.96628	FALSE	0.47109	0.49612
Cluster-35353.52578	zf-GATA	Cluster-35353.52578	UP	1.5581	0.0035159	2087	9727803	XP_018898829.1	781	4.1e-80	PREDICTED: uncharacterized protein LOC109031643 isoform X1 [Bemisia tabaci]	XM_019043285.1	XM_019043285	337	5.67e-174	PREDICTED: Bemisia tabaci uncharacterized LOC109031643 (LOC109031643), transcript variant X2, mRNA	K09403	FOXJ2_3	forkhead box protein J2/3	http://www.genome.jp/dbget-bin/www_bget?ko:K09403	Q8BUR3	182	4.4e-12	Forkhead box protein J3 OS=Mus musculus GN=Foxj3 PE=1 SV=1	--	--	--	--	--	--	--	--	KOG2294	Transcription factor of the Forkhead/HNF3 family	DOWN	-1.1717	0.032531	FALSE	0.63095	0.32576	UP	1.5581	0.0035159	DOWN	-1.4236	2.6e-06	FALSE	0.29914	0.84482
Cluster-35353.12235	zf-MIZ	Cluster-35353.12235	UP	3.4057	1.25e-05	4475	9733939	XP_018905661.1	1746	1.1e-191	PREDICTED: silk gland factor 1 [Bemisia tabaci]	XM_019050116.1	XM_019050116	2856	0	PREDICTED: Bemisia tabaci silk gland factor 1 (LOC109036145), mRNA	K08035	FOXA2, HNF3B	forkhead box protein A2, hepatocyte nuclear factor 3-beta	http://www.genome.jp/dbget-bin/www_bget?ko:K08035	P14734	880	1.1e-92	Protein fork head OS=Drosophila melanogaster GN=fkh PE=1 SV=1	PF08430//PF00250	Forkhead N-terminal region//Forkhead domain	GO:0006355	regulation of transcription, DNA-templated	GO:0008134//GO:0019904//GO:0043565//GO:0003700	transcription factor binding//protein domain specific binding//sequence-specific DNA binding//transcription factor activity, sequence-specific DNA binding	GO:0005667	transcription factor complex	KOG3563	Forkhead/HNF-3-related transcription factor	FALSE	-0.37529	0.86126	UP	3.2316	5.65e-07	UP	3.4057	1.25e-05	FALSE	-0.073432	0.96628	FALSE	-0.24937	0.90519
Cluster-35353.43014	ARID	Cluster-35353.43014	UP	1.8823	0.012411	1549	9727804	XP_018898830.1	826	1.9e-85	PREDICTED: uncharacterized protein LOC109031643 isoform X2 [Bemisia tabaci]	XM_019043285.1	XM_019043285	362	0	PREDICTED: Bemisia tabaci uncharacterized LOC109031643 (LOC109031643), transcript variant X2, mRNA	K09403	FOXJ2_3	forkhead box protein J2/3	http://www.genome.jp/dbget-bin/www_bget?ko:K09403	Q9P0K8	181	4.2e-12	Forkhead box protein J2 OS=Homo sapiens GN=FOXJ2 PE=1 SV=1	PF00250//PF12142	Forkhead domain//Polyphenol oxidase middle domain	GO:0006118//GO:0055114//GO:0006570//GO:0006355	obsolete electron transport//oxidation-reduction process//tyrosine metabolic process//regulation of transcription, DNA-templated	GO:0003700//GO:0004097//GO:0043565	transcription factor activity, sequence-specific DNA binding//catechol oxidase activity//sequence-specific DNA binding	GO:0005667	transcription factor complex	KOG2294	Transcription factor of the Forkhead/HNF3 family	FALSE	-1.771	0.051385	UP	2.5932	0.005933	UP	1.8823	0.012411	FALSE	-0.31618	0.96628	FALSE	-1.4006	0.13831
Cluster-35353.52579	bHLH	Cluster-35353.52579	UP	7.844	1.85e-06	853	9727804	XP_018898830.1	631	4.2e-63	PREDICTED: uncharacterized protein LOC109031643 isoform X2 [Bemisia tabaci]	XM_019043284.1	XM_019043284	469	0	PREDICTED: Bemisia tabaci uncharacterized LOC109031643 (LOC109031643), transcript variant X1, mRNA	--	--	--	--	Q61574	172	2.6e-11	Forkhead box protein S1 OS=Mus musculus GN=Foxs1 PE=2 SV=2	--	--	--	--	--	--	--	--	--	--	FALSE	-0.3924	0.92174	UP	2.8987	0.0083068	UP	7.844	1.85e-06	FALSE	-0.75103	0.29354	FALSE	0.41424	0.86301
Cluster-35353.39030	bHLH	Cluster-35353.39030	UP	4.264	0.021947	750	9727804	XP_018898830.1	703	1.6e-71	PREDICTED: uncharacterized protein LOC109031643 isoform X2 [Bemisia tabaci]	XM_019043285.1	XM_019043285	516	0	PREDICTED: Bemisia tabaci uncharacterized LOC109031643 (LOC109031643), transcript variant X2, mRNA	--	--	--	--	Q28D67	143	5.2e-08	Forkhead box protein I1c OS=Xenopus tropicalis GN=foxi1c PE=2 SV=1	--	--	--	--	--	--	--	--	--	--	FALSE	-0.30175	0.93526	UP	3.3168	0.024206	UP	4.264	0.021947	FALSE	-0.54394	0.95803	FALSE	0.30346	0.92302
Cluster-35353.39815	bHLH	Cluster-35353.39815	UP	1.1071	0.003321	2592	9736329	XP_018907617.1	1623	1.2e-177	PREDICTED: transcription factor Sox-11-like [Bemisia tabaci]	XM_019052072.1	XM_019052072	2403	0	PREDICTED: Bemisia tabaci transcription factor Sox-11-like (LOC109037414), mRNA	K09268	SOX4_11_12	transcription factor SOX4/11/12 (SOX group C)	http://www.genome.jp/dbget-bin/www_bget?ko:K09268	P40656	425	3.6e-40	Putative transcription factor SOX-14 OS=Drosophila melanogaster GN=Sox14 PE=2 SV=3	--	--	--	--	--	--	--	--	KOG0527	HMG-box transcription factor	FALSE	-0.18198	0.9079	UP	1.2729	2.89e-09	UP	1.1071	0.003321	FALSE	-0.23256	0.57961	FALSE	0.099929	0.92302
Cluster-35353.46939	bHLH	Cluster-35353.46939	UP	5.3107	4.03e-10	2300	9723730	XP_018917012.1	1409	6.9e-153	PREDICTED: transcription factor SOX-21-like isoform X1 [Bemisia tabaci]	XM_019061468.1	XM_019061468	2038	0	PREDICTED: Bemisia tabaci transcription factor SOX-21-like (LOC109044014), transcript variant X2, mRNA	K09267	SOX1S	transcription factor SOX1/3/14/21 (SOX group B)	http://www.genome.jp/dbget-bin/www_bget?ko:K09267	Q9W7R5	450	4.1e-43	Transcription factor SOX-21 OS=Gallus gallus GN=SOX21 PE=2 SV=1	PF12336	SOX transcription factor	GO:0006355	regulation of transcription, DNA-templated	--	--	--	--	KOG0527	HMG-box transcription factor	FALSE	-1.158	0.15774	UP	4.8497	4.04e-07	UP	5.3107	4.03e-10	FALSE	0.16073	0.96628	FALSE	-1.2663	0.093609
Cluster-35353.53031	bHLH	Cluster-35353.53031	UP	4.0765	9.06e-05	3394	9722067	XP_018900380.1	2976	0	PREDICTED: putative transcription factor SOX-15 [Bemisia tabaci]	XM_019044835.1	XM_019044835	2713	0	PREDICTED: Bemisia tabaci putative transcription factor SOX-15 (LOC109032605), mRNA	K04495	SOX17	transcription factor SOX17 (SOX group F)	http://www.genome.jp/dbget-bin/www_bget?ko:K04495	P40657	442	5.1e-42	Putative transcription factor SOX-15 OS=Drosophila melanogaster GN=Sox15 PE=2 SV=2	PF05791	Bacillus haemolytic enterotoxin (HBL)	GO:0009405	pathogenesis	--	--	GO:0016020	membrane	KOG0527	HMG-box transcription factor	FALSE	-0.2012	0.93526	UP	3.4886	1.71e-05	UP	4.0765	9.06e-05	FALSE	0.14934	0.96628	FALSE	-0.2986	0.92302
Cluster-28714.0	bHLH	Cluster-28714.0	UP	2.7328	0.037147	1413	9723824	XP_018917118.1	910	3.1e-95	PREDICTED: transcription factor SOX-21-like [Bemisia tabaci]	XM_019061573.1	XM_019061573	1383	0	PREDICTED: Bemisia tabaci transcription factor SOX-21-like (LOC109044069), mRNA	K09267	SOX1S	transcription factor SOX1/3/14/21 (SOX group B)	http://www.genome.jp/dbget-bin/www_bget?ko:K09267	Q6RVD7	419	9.8e-40	Transcription factor Sox-21-B OS=Danio rerio GN=sox21b PE=2 SV=1	--	--	--	--	--	--	--	--	KOG0527	HMG-box transcription factor	FALSE	-1.8799	0.060704	FALSE	2.6796	0.10523	UP	2.7328	0.037147	FALSE	-0.49285	0.96628	FALSE	-1.3343	0.22295
Cluster-36769.0	bHLH	Cluster-36769.0	UP	5.7087	0.030579	876	3403114	XP_004337384.1	274	1.1e-21	HMG ..high mobility group.. box domain containing protein [Acanthamoeba castellanii str. Neff]	XM_003854712.1	XM_003854712	153	4.49e-72	Mycosphaerella graminicola IPO323 HMGB family protein (HMGB2401) mRNA, complete cds	K11296	HMGB3	high mobility group protein B3	http://www.genome.jp/dbget-bin/www_bget?ko:K11296	Q5B995	388	2.4e-36	Non-histone chromosomal protein 6 OS=Emericella nidulans (strain FGSC A4 / ATCC 38163 / CBS 112.46 / NRRL 194 / M139) GN=nhp6 PE=3 SV=1	PF08073	CHDNT (NUC034) domain	GO:0006355	regulation of transcription, DNA-templated	GO:0008270//GO:0005524//GO:0003677//GO:0016818	zinc ion binding//ATP binding//DNA binding//hydrolase activity, acting on acid anhydrides, in phosphorus-containing anhydrides	GO:0005634	nucleus	KOG0381	HMG box-containing protein	FALSE	-1.8787	0.43644	FALSE	3.5122	0.4009	UP	5.7087	0.030579	FALSE	-2.0756	0.57554	FALSE	0.24432	0.96893
Cluster-35353.46132	C/EBP	Cluster-35353.46132	UP	1.9157	0.00014601	2597	9764382	XP_018909740.1	1785	2e-196	PREDICTED: homeobox protein SIX6-like [Bemisia tabaci]	XM_019054195.1	XM_019054195	1597	0	PREDICTED: Bemisia tabaci homeobox protein SIX6-like (LOC109038923), mRNA	K15615	SIX4	homeobox protein SIX4	http://www.genome.jp/dbget-bin/www_bget?ko:K15615	Q61321	614	4.4e-62	Homeobox protein SIX4 OS=Mus musculus GN=Six4 PE=1 SV=1	PF05920//PF00046	Homeobox KN domain//Homeobox domain	GO:0006355	regulation of transcription, DNA-templated	GO:0003677	DNA binding	--	--	KOG0775	Transcription factor SIX and related HOX domain proteins	FALSE	0.15446	0.93526	UP	1.837	1.93e-08	UP	1.9157	0.00014601	FALSE	-0.06721	0.96628	FALSE	0.27281	0.87577
Cluster-35353.43228	CUT	Cluster-35353.43228	UP	2.6202	1.15e-05	1657	9725437	XP_018896200.1	1492	1.2e-162	PREDICTED: homeobox protein vnd-like isoform X1 [Bemisia tabaci]	XM_019040655.1	XM_019040655	1054	0	PREDICTED: Bemisia tabaci homeobox protein vnd-like (LOC109029937), transcript variant X1, mRNA	K08029	NKX2-2	homeobox protein Nkx-2.2	http://www.genome.jp/dbget-bin/www_bget?ko:K08029	P22808	409	1.7e-38	Homeobox protein vnd OS=Drosophila melanogaster GN=vnd PE=1 SV=3	PF00046	Homeobox domain	--	--	GO:0003677	DNA binding	--	--	KOG0842	Transcription factor tinman/NKX2-3, contains HOX domain	FALSE	0.045803	0.96965	UP	5.3196	1.14e-23	UP	2.6202	1.15e-05	FALSE	-0.052919	0.96628	FALSE	0.14801	0.92603
Cluster-35353.29284	ETS	Cluster-35353.29284	UP	2.2384	0.00067384	2684	9743671	XP_018908422.1	715	2.4e-72	PREDICTED: homeotic protein Sex combs reduced isoform X2 [Bemisia tabaci]	XM_019052876.1	XM_019052876	1712	0	PREDICTED: Bemisia tabaci homeotic protein Sex combs reduced (LOC109037978), transcript variant X1, mRNA	K09311	ANTP	Antp family, other	http://www.genome.jp/dbget-bin/www_bget?ko:K09311	P09077	491	8.3e-48	Homeotic protein Sex combs reduced OS=Drosophila melanogaster GN=Scr PE=1 SV=5	PF00046//PF05920	Homeobox domain//Homeobox KN domain	GO:0006355	regulation of transcription, DNA-templated	GO:0003677	DNA binding	--	--	--	--	FALSE	0.42487	0.81064	UP	3.6047	4.76e-12	UP	2.2384	0.00067384	FALSE	-0.31953	0.90751	FALSE	0.79339	0.14974
Cluster-35353.10096	ETS	Cluster-35353.10096	UP	2.9543	1.75e-08	4797	9743025	XP_018908410.1	673	3.2e-67	PREDICTED: homeotic protein antennapedia-like isoform X1 [Bemisia tabaci]	XM_019052869.1	XM_019052869	4278	0	PREDICTED: Bemisia tabaci homeotic protein antennapedia-like (LOC109037973), transcript variant X5, mRNA	K09307	HOX_7	homeobox protein HoxA/B7	http://www.genome.jp/dbget-bin/www_bget?ko:K09307	P02833	369	2.1e-33	Homeotic protein antennapedia OS=Drosophila melanogaster GN=Antp PE=1 SV=1	PF02932//PF03153//PF00046	Neurotransmitter-gated ion-channel transmembrane region//Transcription factor IIA, alpha/beta subunit//Homeobox domain	GO:0006811//GO:0006367	ion transport//transcription initiation from RNA polymerase II promoter	GO:0003677	DNA binding	GO:0005672//GO:0016020	transcription factor TFIIA complex//membrane	--	--	FALSE	-0.066634	0.96522	UP	3.4003	1.19e-15	UP	2.9543	1.75e-08	FALSE	-0.14827	0.96628	FALSE	0.13081	0.92603
Cluster-35353.41214	Fork head	Cluster-35353.41214	DOWN	-1.1396	0.012076	3830	9734631	XP_018906433.1	1958	2.5e-216	PREDICTED: LIM..homeobox protein Lhx4-like isoform X3 [Bemisia tabaci]	XM_019050888.1	XM_019050888	2076	0	PREDICTED: Bemisia tabaci LIM/homeobox protein Lhx4-like (LOC109036574), transcript variant X3, mRNA	K09374	LHX3_4	LIM homeobox protein 3/4	http://www.genome.jp/dbget-bin/www_bget?ko:K09374	Q90421	923	9.6e-98	LIM/homeobox protein Lhx3 OS=Danio rerio GN=lhx3 PE=2 SV=1	PF05920//PF00046//PF00412//PF07503//PF00130	Homeobox KN domain//Homeobox domain//LIM domain//HypF finger//Phorbol esters/diacylglycerol binding domain (C1 domain)	GO:0035556//GO:0006355	intracellular signal transduction//regulation of transcription, DNA-templated	GO:0008270//GO:0003677	zinc ion binding//DNA binding	--	--	KOG4577	Transcription factor LIM3, contains LIM and HOX domains	FALSE	-0.40973	0.67923	FALSE	-0.74278	0.007135	DOWN	-1.1396	0.012076	FALSE	-0.0842	0.96628	FALSE	-0.27667	0.8824
Cluster-35353.17346	Fork head	Cluster-35353.17346	UP	3.5146	6.57e-07	1800	9743674	XP_018908425.1	1138	1.4e-121	PREDICTED: muscle segmentation homeobox [Bemisia tabaci]	XM_019052880.1	XM_019052880	1204	0	PREDICTED: Bemisia tabaci muscle segmentation homeobox (LOC109037982), mRNA	K09341	MSX	homeobox protein MSX	http://www.genome.jp/dbget-bin/www_bget?ko:K09341	Q03372	490	7.3e-48	Muscle segmentation homeobox OS=Drosophila melanogaster GN=Dr PE=2 SV=2	PF01021//PF00046	TYA transposon protein//Homeobox domain	--	--	GO:0003723//GO:0003677	RNA binding//DNA binding	GO:0005737	cytoplasm	KOG0492	Transcription factor MSH, contains HOX domain	FALSE	-0.011527	0.98881	UP	3.3823	1.42e-11	UP	3.5146	6.57e-07	FALSE	0.049642	0.96628	FALSE	-0.010082	0.99051
Cluster-35353.45759	Fork head	Cluster-35353.45759	UP	2.5826	1.76e-05	3466	9723172	XP_018912329.1	1736	1.3e-190	PREDICTED: LIM..homeobox protein Lhx5 isoform X1 [Bemisia tabaci]	XM_019056793.1	XM_019056793	3148	0	PREDICTED: Bemisia tabaci LIM/homeobox protein Lhx5 (LOC109040748), transcript variant X2, mRNA	K09372	LHX1	LIM homeobox protein 1	http://www.genome.jp/dbget-bin/www_bget?ko:K09372	P53411	804	5.5e-84	LIM/homeobox protein Lhx1 OS=Gallus gallus GN=LHX1 PE=2 SV=1	PF05920//PF00412//PF00046	Homeobox KN domain//LIM domain//Homeobox domain	GO:0006355	regulation of transcription, DNA-templated	GO:0003677//GO:0008270	DNA binding//zinc ion binding	--	--	KOG4577	Transcription factor LIM3, contains LIM and HOX domains	FALSE	-0.23789	0.935	UP	3.7817	1.14e-10	UP	2.5826	1.76e-05	FALSE	0.17863	0.96628	FALSE	-0.36814	0.82138
Cluster-35353.63760	Fork head	Cluster-35353.63760	UP	1.2218	0.035792	2259	9736476	XP_018907779.1	1740	2.8e-191	PREDICTED: insulin gene enhancer protein ISL-1 isoform X3 [Bemisia tabaci]	XM_019052234.1	XM_019052234	2109	0	PREDICTED: Bemisia tabaci insulin gene enhancer protein ISL-1 (LOC109037517), transcript variant X3, mRNA	--	--	--	--	P61372	1009	6e-108	Insulin gene enhancer protein ISL-1 OS=Mus musculus GN=Isl1 PE=1 SV=1	PF00046//PF05053//PF05920//PF00412	Homeobox domain//Menin//Homeobox KN domain//LIM domain	GO:0006355	regulation of transcription, DNA-templated	GO:0003677//GO:0008270	DNA binding//zinc ion binding	GO:0005634	nucleus	KOG0490	Transcription factor, contains HOX domain	FALSE	-0.9484	0.15803	FALSE	0.48579	0.37392	UP	1.2218	0.035792	FALSE	0.18278	0.96628	DOWN	-1.0774	0.049621
Cluster-35353.68770	Fork head	Cluster-35353.68770	UP	1.4961	0.042982	2711	9731439	XP_018902880.1	1785	2e-196	PREDICTED: uncharacterized protein LOC109034281 [Bemisia tabaci]	XM_019047335.1	XM_019047335	2381	0	PREDICTED: Bemisia tabaci uncharacterized LOC109034281 (LOC109034281), mRNA	--	--	--	--	P52950	411	1.6e-38	Homeobox protein DBX1 OS=Mus musculus GN=Dbx1 PE=2 SV=1	PF00046//PF05920	Homeobox domain//Homeobox KN domain	GO:0006355	regulation of transcription, DNA-templated	GO:0003677	DNA binding	--	--	--	--	FALSE	-0.27471	0.92203	UP	1.8112	0.00065416	UP	1.4961	0.042982	FALSE	-0.21445	0.96628	FALSE	-0.011079	0.98893
Cluster-35353.64627	Fork head	Cluster-35353.64627	UP	2.9662	0.00048435	2380	9765490	XP_018910982.1	2016	2.9e-223	PREDICTED: homeobox protein araucan [Bemisia tabaci]	XM_019055437.1	XM_019055437	1827	0	PREDICTED: Bemisia tabaci homeobox protein araucan (LOC109039780), mRNA	--	--	--	--	Q24248	474	6.9e-46	Homeobox protein araucan OS=Drosophila melanogaster GN=ara PE=1 SV=2	--	--	--	--	--	--	--	--	KOG0773	Transcription factor MEIS1 and related HOX domain proteins	FALSE	-0.28543	0.93526	UP	3.5073	2.11e-07	UP	2.9662	0.00048435	FALSE	-0.51099	0.46085	FALSE	0.28259	0.90961
Cluster-35353.57819	Fork head	Cluster-35353.57819	UP	2.6421	0.0079574	2323	9732366	XP_018903908.1	2015	3.7e-223	PREDICTED: protein apterous-like [Bemisia tabaci]	XM_019048363.1	XM_019048363	2161	0	PREDICTED: Bemisia tabaci protein apterous-like (LOC109034933), mRNA	K09373	LHX2_9	LIM homeobox protein 2/9	http://www.genome.jp/dbget-bin/www_bget?ko:K09373	P29673	737	2.2e-76	Protein apterous OS=Drosophila melanogaster GN=ap PE=2 SV=1	PF00046//PF00412//PF01213//PF05920	Homeobox domain//LIM domain//Adenylate cyclase associated (CAP) N terminal//Homeobox KN domain	GO:0006355//GO:0007010	regulation of transcription, DNA-templated//cytoskeleton organization	GO:0003677//GO:0008270//GO:0003779	DNA binding//zinc ion binding//actin binding	--	--	KOG0490	Transcription factor, contains HOX domain	FALSE	-0.074805	0.96522	UP	4.524	4.68e-07	UP	2.6421	0.0079574	FALSE	0.41806	0.87644	FALSE	-0.44272	0.87783
Cluster-35353.22942	Fork head	Cluster-35353.22942	UP	1.7892	0.022509	3345	9724160	XP_018917492.1	1983	2.8e-219	PREDICTED: uncharacterized protein LOC109044299 isoform X1 [Bemisia tabaci]	XM_019061947.1	XM_019061947	2926	0	PREDICTED: Bemisia tabaci uncharacterized LOC109044299 (LOC109044299), transcript variant X1, mRNA	--	--	--	--	Q9UPW6	196	1.7e-13	DNA-binding protein SATB2 OS=Homo sapiens GN=SATB2 PE=1 SV=2	--	--	--	--	--	--	--	--	KOG3755	SATB1 matrix attachment region binding protein	FALSE	-0.16971	0.93526	UP	2.0324	0.00080241	UP	1.7892	0.022509	FALSE	0.15833	0.96628	FALSE	-0.28144	0.90519
Cluster-35353.66081	Fork head	Cluster-35353.66081	UP	1.5986	0.039298	1871	9732374	XP_018903918.1	1645	2.4e-180	PREDICTED: LIM..homeobox protein Lhx9-like [Bemisia tabaci]	XM_019048373.1	XM_019048373	1182	0	PREDICTED: Bemisia tabaci LIM/homeobox protein Lhx9-like (LOC109034942), mRNA	K09373	LHX2_9	LIM homeobox protein 2/9	http://www.genome.jp/dbget-bin/www_bget?ko:K09373	A0JNI8	795	3.3e-83	LIM/homeobox protein Lhx9 OS=Bos taurus GN=LHX9 PE=2 SV=2	--	--	--	--	--	--	--	--	KOG0490	Transcription factor, contains HOX domain	FALSE	-0.49538	0.78647	FALSE	0.59708	0.54252	UP	1.5986	0.039298	FALSE	0.076286	0.96628	FALSE	-0.52083	0.68848
Cluster-35353.53082	HMG	Cluster-35353.53082	UP	3.3852	5.29e-05	2582	9739027	XP_018916057.1	1331	8.6e-144	PREDICTED: pituitary homeobox homolog Ptx1-like isoform X1 [Bemisia tabaci]	XM_019060512.1	XM_019060512	1623	0	PREDICTED: Bemisia tabaci pituitary homeobox homolog Ptx1-like (LOC109043328), transcript variant X1, mRNA	K04686	PITX2	paired-like homeodomain transcription factor 2	http://www.genome.jp/dbget-bin/www_bget?ko:K04686	O18400	655	7.7e-67	Pituitary homeobox homolog Ptx1 OS=Drosophila melanogaster GN=Ptx1 PE=2 SV=2	--	--	--	--	--	--	--	--	KOG0486	Transcription factor PTX1, contains HOX domain	FALSE	-0.71202	0.55963	UP	4.141	1.04e-06	UP	3.3852	5.29e-05	FALSE	-0.034956	0.98826	FALSE	-0.62444	0.63351
Cluster-35353.8731	HMG	Cluster-35353.8731	UP	2.055	0.01732	3525	9723554	XP_018916194.1	1073	9.7e-114	PREDICTED: homeobox protein Hox-A2-like [Bemisia tabaci]	XM_019060649.1	XM_019060649	994	0	PREDICTED: Bemisia tabaci homeobox protein Hox-A2-like (LOC109043445), mRNA	--	--	--	--	O77215	463	1.9e-44	Homeobox protein unc-4 OS=Drosophila melanogaster GN=unc-4 PE=2 SV=1	--	--	--	--	--	--	--	--	KOG0490	Transcription factor, contains HOX domain	FALSE	-0.18708	0.93526	UP	1.5125	0.014599	UP	2.055	0.01732	FALSE	-0.49639	0.68328	FALSE	0.3575	0.82146
Cluster-35353.25689	HMG	Cluster-35353.25689	UP	4.3085	0.010262	2129	9763933	XP_018909241.1	1941	1.3e-214	PREDICTED: retinal homeobox protein Rx isoform X2 [Bemisia tabaci]	XM_019053696.1	XM_019053696	2018	0	PREDICTED: Bemisia tabaci retinal homeobox protein Rx (LOC109038591), transcript variant X2, mRNA	--	--	--	--	O42567	237	1.9e-18	Retinal homeobox protein Rx-B OS=Xenopus laevis GN=rax-b PE=2 SV=2	PF05920//PF00046	Homeobox KN domain//Homeobox domain	GO:0006355	regulation of transcription, DNA-templated	GO:0003677	DNA binding	--	--	KOG0490	Transcription factor, contains HOX domain	FALSE	-0.68668	0.808	FALSE	2.9247	0.053294	UP	4.3085	0.010262	FALSE	-0.47732	0.96628	FALSE	-0.1606	0.94641
Cluster-35353.15135	HMG	Cluster-35353.15135	UP	5.0505	0.046674	1494	9729551	XP_018900777.1	1302	1.1e-140	PREDICTED: pituitary homeobox 2-like, partial [Bemisia tabaci]	XM_019045232.1	XM_019045232	1187	0	PREDICTED: Bemisia tabaci pituitary homeobox 2-like (LOC109032898), partial mRNA	--	--	--	--	Q9TTD8	178	9.1e-12	Homeobox protein prophet of Pit-1 OS=Canis familiaris GN=PROP1 PE=3 SV=1	PF00046//PF08971//PF00175//PF05920	Homeobox domain//Glycogen synthesis protein//Oxidoreductase NAD-binding domain//Homeobox KN domain	GO:0006355//GO:0005978//GO:0055114	regulation of transcription, DNA-templated//glycogen biosynthetic process//oxidation-reduction process	GO:0003677//GO:0016491	DNA binding//oxidoreductase activity	--	--	--	--	FALSE	0.18188	0.96522	UP	5.8605	0.00078623	UP	5.0505	0.046674	FALSE	0.82402	0.86882	FALSE	-0.59393	0.90946
Cluster-35353.59830	Homeobox	Cluster-35353.59830	UP	3.6024	0.011376	1278	9764185	XP_018909520.1	1294	8.3e-140	PREDICTED: short stature homeobox protein 2-like [Bemisia tabaci]	XM_019053975.1	XM_019053975	1121	0	PREDICTED: Bemisia tabaci short stature homeobox protein 2-like (LOC109038785), transcript variant X2, mRNA	--	--	--	--	O15266	416	2e-39	Short stature homeobox protein OS=Homo sapiens GN=SHOX PE=1 SV=1	PF00046//PF05920	Homeobox domain//Homeobox KN domain	GO:0006355	regulation of transcription, DNA-templated	GO:0003677	DNA binding	--	--	--	--	FALSE	-0.6928	0.78371	UP	4.1494	0.010026	UP	3.6024	0.011376	FALSE	0.13046	0.96628	FALSE	-0.77308	0.71329
Cluster-25089.3	Homeobox	Cluster-25089.3	UP	5.8074	0.021947	1521	9728922	XP_018900081.1	1016	1.7e-107	PREDICTED: thyroid transcription factor 1-like [Bemisia tabaci]	XM_019044536.1	XM_019044536	1336	0	PREDICTED: Bemisia tabaci thyroid transcription factor 1-like (LOC109032418), mRNA	K09342	NKX2-1, TITF1	homeobox protein Nkx-2.1	http://www.genome.jp/dbget-bin/www_bget?ko:K09342	Q9H2Z4	437	8.6e-42	Homeobox protein Nkx-2.4 OS=Homo sapiens GN=NKX2-4 PE=3 SV=3	PF05920//PF00046	Homeobox KN domain//Homeobox domain	GO:0006355	regulation of transcription, DNA-templated	GO:0003677	DNA binding	--	--	KOG0842	Transcription factor tinman/NKX2-3, contains HOX domain	FALSE	-0.60023	0.9261	UP	4.8793	0.031458	UP	5.8074	0.021947	FALSE	0.018309	0.99452	FALSE	-0.56672	0.90961
Cluster-35353.24037	Homeobox	Cluster-35353.24037	UP	1.4878	0.0041526	4064	9734441	XP_018906222.1	3107	0	PREDICTED: heat shock factor protein isoform X3 [Bemisia tabaci]	XM_019050675.1	XM_019050675	1985	0	PREDICTED: Bemisia tabaci heat shock factor protein (LOC109036456), transcript variant X1, mRNA	K09414	HSF1	heat shock transcription factor 1	http://www.genome.jp/dbget-bin/www_bget?ko:K09414	P38529	665	8.4e-68	Heat shock factor protein 1 OS=Gallus gallus GN=HSF1 PE=2 SV=1	PF06005//PF17068//PF06546//PF02955//PF00447	Protein of unknown function (DUF904)//Required for respiratory growth protein 8 mitochondrial//Vertebrate heat shock transcription factor//Prokaryotic glutathione synthetase, ATP-grasp domain//HSF-type DNA-binding	GO:0000002//GO:0043093//GO:0000917//GO:0006750//GO:0006355	mitochondrial genome maintenance//FtsZ-dependent cytokinesis//barrier septum assembly//glutathione biosynthetic process//regulation of transcription, DNA-templated	GO:0003700//GO:0003677//GO:0004363//GO:0043565//GO:0005524	transcription factor activity, sequence-specific DNA binding//DNA binding//glutathione synthase activity//sequence-specific DNA binding//ATP binding	GO:0005737//GO:0005634//GO:0005667	cytoplasm//nucleus//transcription factor complex	KOG0627	Heat shock transcription factor	FALSE	0.32622	0.82654	UP	1.9138	1.26e-14	UP	1.4878	0.0041526	FALSE	-0.234	0.70266	FALSE	0.60544	0.32256
Cluster-35353.16237	Homeobox	Cluster-35353.16237	UP	2.331	1.23e-05	5790	9722115	XP_018900959.1	3759	0	PREDICTED: mushroom body large-type Kenyon cell-specific protein 1 isoform X2 [Bemisia tabaci]	XM_019045423.1	XM_019045423	5042	0	PREDICTED: Bemisia tabaci mushroom body large-type Kenyon cell-specific protein 1 (LOC109033008), transcript variant X3, mRNA	--	--	--	--	Q95YM8	409	5.8e-38	Mushroom body large-type Kenyon cell-specific protein 1 OS=Apis mellifera GN=Mblk-1 PE=1 SV=1	PF05225	helix-turn-helix, Psq domain	--	--	GO:0003677	DNA binding	--	--	KOG4565	E93 protein involved in programmed cell death, putative transcription regulator	FALSE	0.28503	0.88337	UP	3.7015	1.03e-17	UP	2.331	1.23e-05	FALSE	-0.42362	0.43483	FALSE	0.75658	0.21618
Cluster-35353.45711	Homeobox	Cluster-35353.45711	UP	1.0466	0.0018324	5112	9728413	XP_018899509.1	4319	0	PREDICTED: uncharacterized protein DDB_G0284459-like isoform X3 [Bemisia tabaci]	XM_019043964.1	XM_019043964	3200	0	PREDICTED: Bemisia tabaci uncharacterized protein DDB_G0284459-like (LOC109032052), transcript variant X3, mRNA	--	--	--	--	Q9UIF8	136	2.3e-06	Bromodomain adjacent to zinc finger domain protein 2B OS=Homo sapiens GN=BAZ2B PE=1 SV=3	--	--	--	--	--	--	--	--	--	--	FALSE	0.29041	0.69996	UP	1.3282	1.67e-19	UP	1.0466	0.0018324	FALSE	-0.26451	0.16768	FALSE	0.60556	0.067455
Cluster-35353.51935	Homeobox	Cluster-35353.51935	UP	2.5345	0.0026893	2879	9737876	XP_018914769.1	3097	0	PREDICTED: nuclear factor 1 X-type isoform X4 [Bemisia tabaci]	XM_019059224.1	XM_019059224	2767	0	PREDICTED: Bemisia tabaci nuclear factor 1 X-type (LOC109042465), transcript variant X4, mRNA	K09172	NFIN	nuclear factor I, invertebrate	http://www.genome.jp/dbget-bin/www_bget?ko:K09172	Q90932	839	4e-88	Nuclear factor 1 X-type OS=Gallus gallus GN=NFIX PE=2 SV=1	--	--	--	--	--	--	--	--	KOG3663	Nuclear factor I	FALSE	-0.61933	0.5043	UP	2.7586	1.23e-05	UP	2.5345	0.0026893	FALSE	0.25908	0.96628	FALSE	-0.82686	0.40172
Cluster-35353.44863	Homeobox	Cluster-35353.44863	UP	2.4273	1.51e-06	1958	9738862	XP_018915875.1	2067	2.9e-229	PREDICTED: protein gooseberry-like isoform X2 [Bemisia tabaci]	XM_019060330.1	XM_019060330	1761	0	PREDICTED: Bemisia tabaci protein gooseberry-like (LOC109043199), transcript variant X2, mRNA	K09381	PAX3_7	paired box protein 3/7	http://www.genome.jp/dbget-bin/www_bget?ko:K09381	P09082	876	1.4e-92	Protein gooseberry OS=Drosophila melanogaster GN=gsb PE=2 SV=1	PF05920//PF00046//PF01381//PF00292	Homeobox KN domain//Homeobox domain//Helix-turn-helix//'Paired box' domain	GO:0006355	regulation of transcription, DNA-templated	GO:0003677//GO:0043565	DNA binding//sequence-specific DNA binding	--	--	KOG0849	Transcription factor PRD and related proteins, contain PAX and HOX domains	FALSE	-0.45957	0.65971	UP	1.0065	0.0090063	UP	2.4273	1.51e-06	FALSE	0.18733	0.96628	FALSE	-0.59435	0.37432
Cluster-35353.13437	Homeobox	Cluster-35353.13437	UP	2.6194	3.23e-06	2632	9765911	XP_018911456.1	1140	1.2e-121	PREDICTED: POU domain, class 6, transcription factor 2 isoform X1 [Bemisia tabaci]	XM_019055911.1	XM_019055911	2429	0	PREDICTED: Bemisia tabaci POU domain, class 6, transcription factor 1 (LOC109040107), transcript variant X1, mRNA	K09368	POU6F	POU domain transcription factor, class 6	http://www.genome.jp/dbget-bin/www_bget?ko:K09368	Q8BJI4	665	5.4e-68	POU domain, class 6, transcription factor 2 OS=Mus musculus GN=Pou6f2 PE=2 SV=1	PF00046//PF15323//PF00157	Homeobox domain//Developmental protein//Pou domain - N-terminal to homeobox domain	GO:0048598//GO:0006355	embryonic morphogenesis//regulation of transcription, DNA-templated	GO:0003677//GO:0003700	DNA binding//transcription factor activity, sequence-specific DNA binding	GO:0072669//GO:0005667	tRNA-splicing ligase complex//transcription factor complex	KOG3802	Transcription factor OCT-1, contains POU and HOX domains	FALSE	-0.59565	0.5394	UP	2.7428	3.36e-09	UP	2.6194	3.23e-06	FALSE	-0.19913	0.96628	FALSE	-0.34555	0.84482
Cluster-35353.27055	Homeobox	Cluster-35353.27055	UP	2.2693	2.88e-07	2069	9739519	XP_018916600.1	1799	3.7e-198	PREDICTED: transcription factor HNF-4 homolog isoform X5 [Bemisia tabaci]	XM_019061055.1	XM_019061055	1654	0	PREDICTED: Bemisia tabaci transcription factor HNF-4 homolog (LOC109043751), transcript variant X7, mRNA	K07292	NR2A1, HNF4A	hepatocyte nuclear factor 4-alpha	http://www.genome.jp/dbget-bin/www_bget?ko:K07292	P49866	1184	2.8e-128	Transcription factor HNF-4 homolog OS=Drosophila melanogaster GN=Hnf4 PE=1 SV=3	PF00105//PF00104	Zinc finger, C4 type (two domains)//Ligand-binding domain of nuclear hormone receptor	GO:0043401//GO:0006355	steroid hormone mediated signaling pathway//regulation of transcription, DNA-templated	GO:0008270//GO:0003700//GO:0043565	zinc ion binding//transcription factor activity, sequence-specific DNA binding//sequence-specific DNA binding	GO:0005634//GO:0005667	nucleus//transcription factor complex	KOG4215	Hepatocyte nuclear factor 4 and similar steroid hormone receptors	FALSE	-0.23549	0.92174	UP	2.2538	6.36e-27	UP	2.2693	2.88e-07	FALSE	-0.10578	0.96628	FALSE	-0.07789	0.95557
Cluster-35353.41728	Homeobox	Cluster-35353.41728	UP	2.8946	4.07e-06	2286	9734331	XP_018906098.1	1872	1.4e-206	PREDICTED: steroid receptor seven-up, isoforms B..C [Bemisia tabaci]	XM_019050553.1	XM_019050553	1863	0	PREDICTED: Bemisia tabaci steroid receptor seven-up, isoforms B/C (LOC109036371), mRNA	K08547	NR2F1, TFCOUP1	COUP transcription factor 1	http://www.genome.jp/dbget-bin/www_bget?ko:K08547	P16375	1647	6.4e-182	Steroid receptor seven-up, isoforms B/C OS=Drosophila melanogaster GN=svp PE=2 SV=1	PF00105//PF00104	Zinc finger, C4 type (two domains)//Ligand-binding domain of nuclear hormone receptor	GO:0006355//GO:0043401	regulation of transcription, DNA-templated//steroid hormone mediated signaling pathway	GO:0003700//GO:0043565//GO:0008270	transcription factor activity, sequence-specific DNA binding//sequence-specific DNA binding//zinc ion binding	GO:0005634//GO:0005667	nucleus//transcription factor complex	--	--	FALSE	0.13916	0.9382	UP	3.6293	4.52e-10	UP	2.8946	4.07e-06	FALSE	-0.022876	0.99002	FALSE	0.21548	0.90961
Cluster-35353.19403	Homeobox	Cluster-35353.19403	DOWN	-1.4721	0.0049535	3748	9735271	XP_018913114.1	1667	1.4e-182	PREDICTED: T-box-containing protein TBX6L-like [Bemisia tabaci]	XM_019057569.1	XM_019057569	2519	0	PREDICTED: Bemisia tabaci T-box-containing protein TBX6L-like (LOC109041278), mRNA	K10180	TBX6	T-box protein 6	http://www.genome.jp/dbget-bin/www_bget?ko:K10180	Q66JL1	557	2.6e-55	T-box transcription factor TBX6 OS=Xenopus tropicalis GN=tbx6 PE=2 SV=1	PF07127//PF00907	Late nodulin protein//T-box	GO:0009878//GO:0006355	nodule morphogenesis//regulation of transcription, DNA-templated	GO:0046872//GO:0003700	metal ion binding//transcription factor activity, sequence-specific DNA binding	GO:0005667//GO:0005634	transcription factor complex//nucleus	KOG3585	TBX2 and related T-box transcription factors	FALSE	-0.22794	0.93526	DOWN	-1.4662	1.47e-06	DOWN	-1.4721	0.0049535	FALSE	0.69615	0.37461	FALSE	-0.87684	0.36119
Cluster-35353.58192	Homeobox	Cluster-35353.58192	UP	3.24	0.00037433	3101	9737308	XP_018914130.1	2274	4.6e-253	PREDICTED: optomotor-blind protein isoform X1 [Bemisia tabaci]	XM_019058585.1	XM_019058585	2800	0	PREDICTED: Bemisia tabaci optomotor-blind protein (LOC109042035), transcript variant X1, mRNA	K10176	TBX2	T-box protein 2	http://www.genome.jp/dbget-bin/www_bget?ko:K10176	Q24432	1157	5.7e-125	Optomotor-blind protein OS=Drosophila melanogaster GN=bi PE=1 SV=3	PF05399//PF01141//PF03558//PF00907	Ectropic viral integration site 2A protein (EVI2A)//Gag polyprotein, inner coat protein p12//TBSV core protein P21/P22//T-box	GO:0006355	regulation of transcription, DNA-templated	GO:0003700	transcription factor activity, sequence-specific DNA binding	GO:0005667//GO:0005634//GO:0016021//GO:0019028	transcription factor complex//nucleus//integral component of membrane//viral capsid	KOG3585	TBX2 and related T-box transcription factors	FALSE	0.00039305	0.99955	UP	3.0482	6.95e-05	UP	3.24	0.00037433	FALSE	-0.32821	0.96628	FALSE	0.37726	0.84482
Cluster-35353.36054	Homeobox	Cluster-35353.36054	UP	1.1159	0.00038048	2320	9730193	XP_018901495.1	1340	7e-145	PREDICTED: activating transcription factor of chaperone isoform X2 [Bemisia tabaci]	XM_019045950.1	XM_019045950	1510	0	PREDICTED: Bemisia tabaci activating transcription factor of chaperone (LOC109033366), transcript variant X2, mRNA	--	--	--	--	Q9GPH3	159	2.3e-09	Activating transcription factor of chaperone OS=Bombyx mori GN=ATFC PE=2 SV=1	PF03131//PF00170//PF07716	bZIP Maf transcription factor//bZIP transcription factor//Basic region leucine zipper	GO:0006355	regulation of transcription, DNA-templated	GO:0043565//GO:0003700//GO:0003677	sequence-specific DNA binding//transcription factor activity, sequence-specific DNA binding//DNA binding	GO:0005667//GO:0005634	transcription factor complex//nucleus	--	--	FALSE	0.19244	0.88753	UP	1.3129	1.9e-18	UP	1.1159	0.00038048	FALSE	-0.10231	0.96628	FALSE	0.34359	0.46356
Cluster-35353.34294	Homeobox	Cluster-35353.34294	UP	3.0203	3.71e-17	2413	9766250	XP_018911832.1	2009	1.9e-222	PREDICTED: uncharacterized protein LOC109040365 isoform X1 [Bemisia tabaci]	XM_019056288.1	XM_019056288	2279	0	PREDICTED: Bemisia tabaci uncharacterized LOC109040365 (LOC109040365), transcript variant X2, mRNA	--	--	--	--	--	--	--	--	PF02895//PF00170//PF07716	Signal transducing histidine kinase, homodimeric domain//bZIP transcription factor//Basic region leucine zipper	GO:0000160//GO:0006355//GO:0016310//GO:0006935	phosphorelay signal transduction system//regulation of transcription, DNA-templated//phosphorylation//chemotaxis	GO:0043565//GO:0004673//GO:0000155//GO:0003700	sequence-specific DNA binding//protein histidine kinase activity//phosphorelay sensor kinase activity//transcription factor activity, sequence-specific DNA binding	GO:0005667//GO:0005737//GO:0009365	transcription factor complex//cytoplasm//protein histidine kinase complex	KOG3119	Basic region leucine zipper transcription factor	FALSE	-0.53195	0.45426	UP	2.9076	4.79e-87	UP	3.0203	3.71e-17	FALSE	-0.094743	0.96628	FALSE	-0.38731	0.70151
Cluster-35353.42108	Homeobox	Cluster-35353.42108	UP	1.0838	0.048217	3051	9723308	XP_018913695.1	1299	5.2e-140	PREDICTED: transcription factor kayak isoform X1 [Bemisia tabaci]	XM_019058150.1	XM_019058150	2804	0	PREDICTED: Bemisia tabaci transcription factor kayak (LOC109041730), transcript variant X1, mRNA	--	--	--	--	B4JYN3	191	5.8e-13	Transcription factor kayak OS=Drosophila grimshawi GN=kay PE=3 SV=1	PF07716//PF02970//PF03131//PF00170	Basic region leucine zipper//Tubulin binding cofactor A//bZIP Maf transcription factor//bZIP transcription factor	GO:0006355//GO:0007021	regulation of transcription, DNA-templated//tubulin complex assembly	GO:0043565//GO:0003677//GO:0015631//GO:0003700//GO:0051082	sequence-specific DNA binding//DNA binding//tubulin binding//transcription factor activity, sequence-specific DNA binding//unfolded protein binding	GO:0005634//GO:0005667//GO:0045298	nucleus//transcription factor complex//tubulin complex	--	--	FALSE	-0.21755	0.93526	FALSE	0.56482	0.011165	UP	1.0838	0.048217	FALSE	0.052684	0.96628	FALSE	-0.22127	0.90961
Cluster-35353.18712	Homeobox	Cluster-35353.18712	UP	1.1005	0.00061617	5443	9733519	XP_018905189.1	1621	4.3e-177	PREDICTED: cyclic AMP response element-binding protein A-like [Bemisia tabaci]	XM_019049644.1	XM_019049644	1740	0	PREDICTED: Bemisia tabaci cyclic AMP response element-binding protein A-like (LOC109035839), mRNA	K09048	CREB3	cyclic AMP-responsive element-binding protein 3	http://www.genome.jp/dbget-bin/www_bget?ko:K09048	P29747	437	3.1e-41	Cyclic AMP response element-binding protein A OS=Drosophila melanogaster GN=CrebA PE=1 SV=2	PF07926//PF03131//PF04111//PF00170//PF07716	TPR/MLP1/MLP2-like protein//bZIP Maf transcription factor//Autophagy protein Apg6//bZIP transcription factor//Basic region leucine zipper	GO:0006914//GO:0006355//GO:0006606	autophagy//regulation of transcription, DNA-templated//protein import into nucleus	GO:0003677//GO:0043565//GO:0003700	DNA binding//sequence-specific DNA binding//transcription factor activity, sequence-specific DNA binding	GO:0005667//GO:0005634	transcription factor complex//nucleus	KOG0709	CREB/ATF family transcription factor	FALSE	0.56035	0.10607	UP	1.4481	3.7e-19	UP	1.1005	0.00061617	FALSE	-0.036529	0.96628	FALSE	0.64452	0.018343
Cluster-35353.28518	Homeobox	Cluster-35353.28518	UP	3.1238	2.57e-10	2269	9736968	XP_018913751.1	1501	1.5e-163	PREDICTED: uncharacterized protein LOC109041784 [Bemisia tabaci]	XM_019058206.1	XM_019058206	1402	0	PREDICTED: Bemisia tabaci uncharacterized LOC109041784 (LOC109041784), mRNA	K09036	MAFB	transcription factor MAFB	http://www.genome.jp/dbget-bin/www_bget?ko:K09036	Q6DE84	199	5.1e-14	Transcription factor MafB OS=Xenopus laevis GN=mafb PE=2 SV=1	PF03131//PF00170//PF05478	bZIP Maf transcription factor//bZIP transcription factor//Prominin	GO:0006355	regulation of transcription, DNA-templated	GO:0003677//GO:0003700//GO:0043565	DNA binding//transcription factor activity, sequence-specific DNA binding//sequence-specific DNA binding	GO:0016021//GO:0005634//GO:0005667	integral component of membrane//nucleus//transcription factor complex	KOG4196	bZIP transcription factor MafK	FALSE	-0.10422	0.96522	UP	2.6454	2.15e-26	UP	3.1238	2.57e-10	FALSE	0.2553	0.49302	FALSE	-0.30564	0.89192
Cluster-35353.56096	Homeobox	Cluster-35353.56096	UP	1.9646	3.71e-06	3654	9737927	XP_018914826.1	1635	6.8e-179	PREDICTED: uncharacterized protein LOC109042498 [Bemisia tabaci]	XM_019059281.1	XM_019059281	2849	0	PREDICTED: Bemisia tabaci uncharacterized LOC109042498 (LOC109042498), mRNA	--	--	--	--	Q68EL6	237	3.2e-18	Nuclear factor interleukin-3-regulated protein OS=Danio rerio GN=nfil3 PE=2 SV=1	PF07716//PF00170	Basic region leucine zipper//bZIP transcription factor	GO:0006355	regulation of transcription, DNA-templated	GO:0003700//GO:0043565	transcription factor activity, sequence-specific DNA binding//sequence-specific DNA binding	GO:0005667	transcription factor complex	KOG3119	Basic region leucine zipper transcription factor	FALSE	-0.63432	0.39441	UP	1.9541	9.28e-16	UP	1.9646	3.71e-06	FALSE	-0.078556	0.96628	FALSE	-0.50426	0.5486
Cluster-35353.24372	RXR-like	Cluster-35353.24372	UP	1.1997	0.031343	1432	9733154	XP_018904782.1	1211	3.9e-130	PREDICTED: transcription factor AP-1 [Bemisia tabaci]	XM_019049237.1	XM_019049237	1359	0	PREDICTED: Bemisia tabaci transcription factor AP-1 (LOC109035563), mRNA	K04448	JUN	transcription factor AP-1	http://www.genome.jp/dbget-bin/www_bget?ko:K04448	P18289	331	1.6e-29	Transcription factor AP-1 OS=Drosophila melanogaster GN=Jra PE=1 SV=2	--	--	--	--	--	--	--	--	KOG1414	Transcriptional activator FOSB/c-Fos and related bZIP transcription factors	FALSE	0.02842	0.97305	UP	1.3546	2.76e-07	UP	1.1997	0.031343	FALSE	0.15436	0.96628	FALSE	-0.076482	0.96494
Cluster-35353.55177	T-box	Cluster-35353.55177	UP	4.1842	2.09e-07	2676	9723536	XP_018915971.1	1914	2.2e-211	PREDICTED: activating transcription factor 3 [Bemisia tabaci]	XM_019060426.1	XM_019060426	2484	0	PREDICTED: Bemisia tabaci activating transcription factor 3 (LOC109043279), mRNA	K09033	JDP2	jun dimerization protein 2	http://www.genome.jp/dbget-bin/www_bget?ko:K09033	Q6DGM8	163	9e-10	Jun dimerization protein 2 OS=Danio rerio GN=jdp2 PE=2 SV=1	PF03131//PF04977//PF07716//PF04111//PF00170//PF07989	bZIP Maf transcription factor//Septum formation initiator//Basic region leucine zipper//Autophagy protein Apg6//bZIP transcription factor//Centrosomin N-terminal motif 1	GO:0007049//GO:0006914//GO:0006355	cell cycle//autophagy//regulation of transcription, DNA-templated	GO:0003677//GO:0043565//GO:0003700	DNA binding//sequence-specific DNA binding//transcription factor activity, sequence-specific DNA binding	GO:0005667//GO:0005634//GO:0005815	transcription factor complex//nucleus//microtubule organizing center	--	--	FALSE	0.60193	0.47857	UP	3.5846	3.87e-14	UP	4.1842	2.09e-07	FALSE	0.081146	0.96628	FALSE	0.57312	0.46149
Cluster-6251.1	TF_bZIP	Cluster-6251.1	UP	21.643	1.87e-06	1471	5580856	XP_012150068.1	838	7.2e-87	PREDICTED: LOW QUALITY PROTEIN: uncharacterized protein LOC100875840 [Megachile rotundata]	--	--	--	--	--	K09027	XBP1	X box-binding protein 1	http://www.genome.jp/dbget-bin/www_bget?ko:K09027	Q9R1S4	186	1.1e-12	X-box-binding protein 1 OS=Rattus norvegicus GN=Xbp1 PE=2 SV=1	PF08172//PF16714//PF07716//PF03131//PF02183//PF00170//PF06156	CASP C terminal//Tyrosyl-tRNA synthetase C-terminal domain//Basic region leucine zipper//bZIP Maf transcription factor//Homeobox associated leucine zipper//bZIP transcription factor//Protein of unknown function (DUF972)	GO:0006355//GO:0006891//GO:0006260	regulation of transcription, DNA-templated//intra-Golgi vesicle-mediated transport//DNA replication	GO:0003677//GO:0043565//GO:0003723//GO:0003700	DNA binding//sequence-specific DNA binding//RNA binding//transcription factor activity, sequence-specific DNA binding	GO:0030173//GO:0005634//GO:0005667	integral component of Golgi membrane//nucleus//transcription factor complex	KOG4005	Transcription factor XBP-1	DOWN	-21.1	4.41e-06	FALSE	NA	NA	UP	21.643	1.87e-06	FALSE	NA	NA	DOWN	-21.187	2.99e-06
Cluster-35353.46742	TF_bZIP	Cluster-35353.46742	UP	1.3476	0.004252	2316	9731895	XP_018903387.1	1362	2e-147	PREDICTED: stress response protein NST1-like isoform X1 [Bemisia tabaci]	XM_019047842.1	XM_019047842	1454	0	PREDICTED: Bemisia tabaci stress response protein NST1-like (LOC109034601), transcript variant X1, mRNA	--	--	--	--	--	--	--	--	--	--	--	--	--	--	--	--	--	--	FALSE	-0.15787	0.93526	UP	1.5531	4.14e-07	UP	1.3476	0.004252	FALSE	-0.33705	0.63516	FALSE	0.22751	0.88701
Cluster-35353.33064	TF_bZIP	Cluster-35353.33064	UP	1.8565	6.24e-06	6734	9736316	XP_018907602.1	3907	0	PREDICTED: ecdysone-inducible protein E75 isoform X2 [Bemisia tabaci]	XM_019052057.1	XM_019052057	6415	0	PREDICTED: Bemisia tabaci nuclear hormone receptor E75 (LOC109037406), transcript variant X2, mRNA	--	--	--	--	O77245	1506	4.2e-165	Nuclear hormone receptor E75 OS=Metapenaeus ensis GN=E75 PE=2 SV=1	PF00104//PF00105	Ligand-binding domain of nuclear hormone receptor//Zinc finger, C4 type (two domains)	GO:0006355//GO:0043401	regulation of transcription, DNA-templated//steroid hormone mediated signaling pathway	GO:0008270//GO:0043565//GO:0003700	zinc ion binding//sequence-specific DNA binding//transcription factor activity, sequence-specific DNA binding	GO:0005667//GO:0005634	transcription factor complex//nucleus	--	--	FALSE	-0.034272	0.96965	UP	1.7046	8.12e-33	UP	1.8565	6.24e-06	FALSE	0.10047	0.96628	FALSE	-0.087601	0.95068
Cluster-35353.17072	TF_bZIP	Cluster-35353.17072	UP	2.5072	0.048835	1700	9737569	XP_018914424.1	2143	3.9e-238	PREDICTED: ecdysone-induced protein 78C isoform X2 [Bemisia tabaci]	XM_019058879.1	XM_019058879	1651	0	PREDICTED: Bemisia tabaci ecdysone-induced protein 78C (LOC109042231), transcript variant X2, mRNA	K08701	NR1D3	nuclear receptor subfamily 1 group D member 3	http://www.genome.jp/dbget-bin/www_bget?ko:K08701	P45447	789	1.5e-82	Ecdysone-induced protein 78C OS=Drosophila melanogaster GN=Eip78C PE=2 SV=4	PF00105//PF00104	Zinc finger, C4 type (two domains)//Ligand-binding domain of nuclear hormone receptor	GO:0006355//GO:0043401	regulation of transcription, DNA-templated//steroid hormone mediated signaling pathway	GO:0008270//GO:0043565//GO:0003700	zinc ion binding//sequence-specific DNA binding//transcription factor activity, sequence-specific DNA binding	GO:0005667//GO:0005634	transcription factor complex//nucleus	--	--	FALSE	-0.28322	0.93526	UP	1.8015	0.012049	UP	2.5072	0.048835	FALSE	0.091976	0.96628	FALSE	-0.3261	0.90961
Cluster-35353.53248	TF_bZIP	Cluster-35353.53248	DOWN	-1.2003	0.007998	3323	9725180	XP_018895912.1	2043	3e-226	PREDICTED: protein king tubby [Bemisia tabaci]	XM_019040367.1	XM_019040367	2378	0	PREDICTED: Bemisia tabaci protein king tubby (LOC109029752), mRNA	--	--	--	--	Q16IR1	1089	4.7e-117	Protein king tubby 2 OS=Aedes aegypti GN=king-tubby2 PE=3 SV=1	--	--	--	--	--	--	--	--	KOG2502	Tub family proteins	FALSE	0.005747	0.99356	DOWN	-1.0235	8.67e-05	DOWN	-1.2003	0.007998	FALSE	-0.14787	0.96628	FALSE	0.19997	0.90961
Cluster-35353.51248	TF_bZIP	Cluster-35353.51248	UP	1.0229	0.01553	2497	9729871	XP_018901133.1	3105	0	PREDICTED: kelch-like protein diablo [Bemisia tabaci]	XM_019045588.1	XM_019045588	2336	0	PREDICTED: Bemisia tabaci kelch-like protein diablo (LOC109033135), mRNA	K10457	KLHL20, KLEIP	kelch-like protein 20	http://www.genome.jp/dbget-bin/www_bget?ko:K10457	Q16RL8	2807	0	Kelch-like protein diablo OS=Aedes aegypti GN=dbo PE=3 SV=1	PF01344//PF00651//PF07646	Kelch motif//BTB/POZ domain//Kelch motif	--	--	GO:0005515	protein binding	--	--	KOG4441	Proteins containing BTB/POZ and Kelch domains, involved in regulatory/signal transduction processes	FALSE	0.26783	0.82541	UP	1.1299	3.66e-08	UP	1.0229	0.01553	FALSE	-0.16749	0.94931	FALSE	0.48462	0.3672
Cluster-35353.16751	TF_bZIP	Cluster-35353.16751	UP	1.4791	0.026256	3997	9764285	XP_018909631.1	2676	1.5e-299	PREDICTED: protein abrupt-like isoform X1 [Bemisia tabaci]	XM_019054085.1	XM_019054085	3793	0	PREDICTED: Bemisia tabaci protein abrupt-like (LOC109038862), transcript variant X1, mRNA	--	--	--	--	Q24174	693	4.7e-71	Protein abrupt OS=Drosophila melanogaster GN=ab PE=1 SV=2	PF13912//PF00096//PF00651//PF02892	C2H2-type zinc finger//Zinc finger, C2H2 type//BTB/POZ domain//BED zinc finger	--	--	GO:0003677//GO:0005515//GO:0046872	DNA binding//protein binding//metal ion binding	--	--	--	--	FALSE	-0.12646	0.95253	UP	1.103	0.00028385	UP	1.4791	0.026256	FALSE	0.036583	0.96999	FALSE	-0.11525	0.95337
Cluster-35353.53930	TF_bZIP	Cluster-35353.53930	UP	1.6809	0.0001499	1492	9750453	XP_018908723.1	2197	1.9e-244	PREDICTED: BTB..POZ domain-containing protein 17 [Bemisia tabaci]	XM_019053178.1	XM_019053178	1405	0	PREDICTED: Bemisia tabaci BTB/POZ domain-containing protein 17 (LOC109038197), mRNA	--	--	--	--	Q6GLJ1	372	2.9e-34	BTB/POZ domain-containing protein 17 OS=Xenopus laevis GN=btbd17 PE=2 SV=2	--	--	--	--	--	--	--	--	KOG2075	Topoisomerase TOP1-interacting protein BTBD1	FALSE	-0.19826	0.92403	UP	1.0122	0.00048983	UP	1.6809	0.0001499	FALSE	-0.092742	0.96628	FALSE	-0.056667	0.96893
Cluster-35353.13119	THR-like	Cluster-35353.13119	UP	4.4965	5.65e-08	2853	9721397	XP_018906668.1	1953	7.1e-216	PREDICTED: BTB..POZ domain-containing protein 2 [Bemisia tabaci]	XM_019051123.1	XM_019051123	2477	0	PREDICTED: Bemisia tabaci BTB/POZ domain-containing protein 2 (LOC109036726), mRNA	K10477	BTBD1_2	BTB/POZ domain-containing protein 1/2	http://www.genome.jp/dbget-bin/www_bget?ko:K10477	Q9BX70	171	1.1e-10	BTB/POZ domain-containing protein 2 OS=Homo sapiens GN=BTBD2 PE=1 SV=1	PF00651	BTB/POZ domain	--	--	GO:0005515	protein binding	--	--	KOG2075	Topoisomerase TOP1-interacting protein BTBD1	FALSE	0.13366	0.93771	UP	5.9414	1.2e-11	UP	4.4965	5.65e-08	FALSE	0.11193	0.96628	FALSE	0.068443	0.96893
Cluster-35353.15999	ZBTB	Cluster-35353.15999	UP	1.4609	0.010108	3915	11124828	XP_022309566.1	286	1.9e-22	zinc finger protein 665-like [Crassostrea virginica]	XM_019060095.1	XM_019060095	973	0	PREDICTED: Bemisia tabaci zinc finger and BTB domain-containing protein 49-like (LOC109043064), mRNA	--	--	--	--	B4DU55	269	6.7e-22	Zinc finger protein 879 OS=Homo sapiens GN=ZNF879 PE=2 SV=2	PF02892//PF00096//PF06467//PF15313//PF13465//PF13912//PF06689//PF01428//PF16622//PF00651	BED zinc finger//Zinc finger, C2H2 type//MYM-type Zinc finger with FCS sequence motif//Hexamethylene bis-acetamide-inducible protein//Zinc-finger double domain//C2H2-type zinc finger//ClpX C4-type zinc finger//AN1-like Zinc finger//zinc-finger C2H2-type//BTB/POZ domain	GO:0007050//GO:0000122//GO:0045859	cell cycle arrest//negative regulation of transcription from RNA polymerase II promoter//regulation of protein kinase activity	GO:0008270//GO:0005515//GO:0004861//GO:0046983//GO:0017069//GO:0046872//GO:0003677	zinc ion binding//protein binding//cyclin-dependent protein serine/threonine kinase inhibitor activity//protein dimerization activity//snRNA binding//metal ion binding//DNA binding	GO:0005737//GO:0005634	cytoplasm//nucleus	--	--	FALSE	-0.1698	0.93526	UP	1.3665	0.0017622	UP	1.4609	0.010108	FALSE	-0.091603	0.96628	FALSE	-0.025752	0.97334
Cluster-35353.51046	ZBTB	Cluster-35353.51046	UP	1.7788	0.012497	2974	9735548	XP_018906746.1	3135	0	PREDICTED: kelch-like protein 18 [Bemisia tabaci]	XM_019051201.1	XM_019051201	2417	0	PREDICTED: Bemisia tabaci kelch-like protein 18 (LOC109036825), mRNA	K10455	KLHL18	kelch-like protein 18	http://www.genome.jp/dbget-bin/www_bget?ko:K10455	O94889	1595	8.9e-176	Kelch-like protein 18 OS=Homo sapiens GN=KLHL18 PE=1 SV=3	PF07646//PF00651//PF01344	Kelch motif//BTB/POZ domain//Kelch motif	--	--	GO:0005515	protein binding	--	--	KOG4441	Proteins containing BTB/POZ and Kelch domains, involved in regulatory/signal transduction processes	FALSE	-0.018095	0.98216	UP	2.0618	1.56e-06	UP	1.7788	0.012497	FALSE	-0.36298	0.69749	FALSE	0.39497	0.75545
Cluster-35353.65250	ZBTB	Cluster-35353.65250	UP	2.7588	0.019552	2955	9726306	XP_018897162.1	4297	0	PREDICTED: uncharacterized protein LOC109030581 [Bemisia tabaci]	XM_019041617.1	XM_019041617	2796	0	PREDICTED: Bemisia tabaci uncharacterized LOC109030581 (LOC109030581), mRNA	--	--	--	--	P47736	664	8e-68	Rap1 GTPase-activating protein 1 OS=Homo sapiens GN=RAP1GAP PE=1 SV=2	PF02145//PF00651//PF04647	Rap/ran-GAP//BTB/POZ domain//Accessory gene regulator B	GO:0051056//GO:0009405//GO:0009372	regulation of small GTPase mediated signal transduction//pathogenesis//quorum sensing	GO:0005515//GO:0005096//GO:0008233	protein binding//GTPase activator activity//peptidase activity	GO:0016021	integral component of membrane	KOG3686	Rap1-GTPase-activating protein (Rap1GAP)	FALSE	0.063802	0.96522	UP	5.3606	6.1e-05	UP	2.7588	0.019552	FALSE	-0.20395	0.96628	FALSE	0.31128	0.90961
Cluster-35353.20968	ZBTB	Cluster-35353.20968	UP	1.0774	0.0014714	5325	9727942	XP_018898984.1	2383	1.8e-265	PREDICTED: zinc finger protein with KRAB and SCAN domains 7-like isoform X1 [Bemisia tabaci]	XM_019043440.1	XM_019043440	5007	0	PREDICTED: Bemisia tabaci zinc finger protein 652-B-like (LOC109031733), transcript variant X2, mRNA	--	--	--	--	P51814	432	1.1e-40	Zinc finger protein 41 OS=Homo sapiens GN=ZNF41 PE=1 SV=2	--	--	--	--	--	--	--	--	--	--	FALSE	0.1399	0.93454	UP	1.1749	2.53e-16	UP	1.0774	0.0014714	FALSE	0.06358	0.96628	FALSE	0.12507	0.92302
Cluster-35353.36748	ZBTB	Cluster-35353.36748	UP	1.0376	0.035223	3429	9725404	XP_018896162.1	3541	0	PREDICTED: uncharacterized protein LOC109029913 [Bemisia tabaci]	XM_019040617.1	XM_019040617	2622	0	PREDICTED: Bemisia tabaci uncharacterized LOC109029913 (LOC109029913), mRNA	--	--	--	--	Q96IR2	260	6.5e-21	Zinc finger protein 845 OS=Homo sapiens GN=ZNF845 PE=2 SV=3	PF13465//PF16855//PF05324//PF01155//PF00096	Zinc-finger double domain//Small outer capsid protein//Sperm antigen HE2//Hydrogenase/urease nickel incorporation, metallochaperone, hypA//Zinc finger, C2H2 type	GO:0006464	cellular protein modification process	GO:0016151//GO:0046872	nickel cation binding//metal ion binding	GO:0005576//GO:0019028	extracellular region//viral capsid	--	--	FALSE	-0.39034	0.72565	UP	1.4153	1.1e-12	UP	1.0376	0.035223	FALSE	-0.21271	0.84338	FALSE	-0.12553	0.92475
Cluster-35353.34050	ZBTB	Cluster-35353.34050	UP	1.3925	0.0017845	3436	5905708	XP_005101468.2	587	2.1e-57	PREDICTED: zinc finger protein 493-like [Aplysia californica]	XM_019052666.1	XM_019052666	2600	0	PREDICTED: Bemisia tabaci zinc finger protein 436-like (LOC109037840), mRNA	--	--	--	--	Q05481	544	7.6e-54	Zinc finger protein 91 OS=Homo sapiens GN=ZNF91 PE=2 SV=2	--	--	--	--	--	--	--	--	--	--	FALSE	0.48636	0.45762	UP	1.5661	2.46e-15	UP	1.3925	0.0017845	FALSE	0.71449	5.45e-05	FALSE	-0.17695	0.90961
Cluster-35353.51217	zf-C2H2	Cluster-35353.51217	UP	1.9903	3.21e-07	5240	9732214	XP_018903741.1	3788	0	PREDICTED: transcriptional activator cubitus interruptus isoform X2 [Bemisia tabaci]	XM_019048196.1	XM_019048196	3789	0	PREDICTED: Bemisia tabaci transcriptional activator cubitus interruptus (LOC109034825), transcript variant X2, mRNA	K16799	CI	transcriptional activator cubitus interruptus	http://www.genome.jp/dbget-bin/www_bget?ko:K16799	P19538	955	2.6e-101	Transcriptional activator cubitus interruptus OS=Drosophila melanogaster GN=ci PE=1 SV=2	--	--	--	--	--	--	--	--	KOG1721	FOG: Zn-finger	FALSE	0.32274	0.60026	UP	2.189	5.88e-18	UP	1.9903	3.21e-07	FALSE	-0.22863	0.67136	FALSE	0.60022	0.086096
Cluster-35353.50796	zf-C2H2	Cluster-35353.50796	UP	1.1621	0.012426	2790	9738985	XP_018916011.1	3723	0	PREDICTED: PR domain zinc finger protein 5-like isoform X1 [Bemisia tabaci]	XM_019060466.1	XM_019060466	2640	0	PREDICTED: Bemisia tabaci zinc finger protein 845-like (LOC109043298), transcript variant X1, mRNA	--	--	--	--	Q5RB30	458	5.8e-44	Zinc finger protein 585B OS=Pongo abelii GN=ZNF585B PE=2 SV=1	--	--	--	--	--	--	--	--	--	--	FALSE	-0.4587	0.64477	FALSE	0.85453	0.00016335	UP	1.1621	0.012426	FALSE	0.19534	0.87868	FALSE	-0.60306	0.34947
Cluster-35353.28647	zf-C2H2	Cluster-35353.28647	UP	2.4896	9.07e-05	1864	9728531	XP_018899643.1	1710	7e-188	PREDICTED: Krueppel-like factor 14 [Bemisia tabaci]	XM_019044097.1	XM_019044097	1744	0	PREDICTED: Bemisia tabaci Krueppel-like factor 14 (LOC109032127), transcript variant X1, mRNA	K13943	CBT	cabut	http://www.genome.jp/dbget-bin/www_bget?ko:K13943	Q6NW96	343	8.4e-31	Transcription factor Sp9 OS=Danio rerio GN=sp9 PE=2 SV=1	--	--	--	--	--	--	--	--	--	--	FALSE	-0.55063	0.82687	UP	3.1072	2.54e-26	UP	2.4896	9.07e-05	FALSE	-0.15666	0.96628	FALSE	-0.33741	0.90585
Cluster-35353.51131	zf-C2H2	Cluster-35353.51131	DOWN	-1.0866	0.0091664	1905	9733710	XP_018905404.1	2697	2.5e-302	PREDICTED: uncharacterized protein LOC109035982 isoform X1 [Bemisia tabaci]	XM_019049860.1	XM_019049860	1717	0	PREDICTED: Bemisia tabaci uncharacterized LOC109035982 (LOC109035982), transcript variant X2, mRNA	--	--	--	--	P18749	149	2.7e-08	Oocyte zinc finger protein XlCOF6 (Fragment) OS=Xenopus laevis PE=3 SV=1	PF00096//PF13465	Zinc finger, C2H2 type//Zinc-finger double domain	--	--	GO:0046872	metal ion binding	--	--	--	--	FALSE	-0.21286	0.92428	DOWN	-1.4858	7.05e-16	DOWN	-1.0866	0.0091664	FALSE	-0.049766	0.96628	FALSE	-0.11589	0.92603
Cluster-35353.24486	zf-C2H2	Cluster-35353.24486	UP	1.8226	0.019208	3255	9750462	XP_018908734.1	4516	0	PREDICTED: zinc finger protein 665-like [Bemisia tabaci]	XM_019053189.1	XM_019053189	2400	0	PREDICTED: Bemisia tabaci zinc finger protein 665-like (LOC109038204), transcript variant X2, mRNA	--	--	--	--	Q9N003	889	7.1e-94	Zinc finger protein 425 (Fragment) OS=Macaca fascicularis GN=ZNF425 PE=2 SV=2	PF13912//PF00096//PF16622//PF13465	C2H2-type zinc finger//Zinc finger, C2H2 type//zinc-finger C2H2-type//Zinc-finger double domain	--	--	GO:0046872	metal ion binding	--	--	--	--	FALSE	1.2921	0.086708	UP	2.5498	0.0026686	UP	1.8226	0.019208	FALSE	0.022577	0.98473	UP	1.3177	0.049935
Cluster-35353.29028	zf-C2H2	Cluster-35353.29028	UP	3.55	3e-12	4514	3308191	ELU03131.1	430	4.5e-39	hypothetical protein CAPTEDRAFT_198317 [Capitella teleta]	XM_019049129.1	XM_019049129	3234	0	PREDICTED: Bemisia tabaci PR domain zinc finger protein 1-like (LOC109035475), mRNA	--	--	--	--	Q14590	407	7.7e-38	Zinc finger protein 235 OS=Homo sapiens GN=ZNF235 PE=2 SV=3	PF00856//PF00096//PF13912//PF13465	SET domain//Zinc finger, C2H2 type//C2H2-type zinc finger//Zinc-finger double domain	--	--	GO:0046872//GO:0005515	metal ion binding//protein binding	--	--	--	--	FALSE	0.23669	0.90834	UP	4.2915	3.88e-21	UP	3.55	3e-12	FALSE	0.1706	0.96628	FALSE	0.11428	0.92603
Cluster-35353.48398	zf-C2H2	Cluster-35353.48398	UP	1.7668	0.00045747	5658	9724413	XP_018917772.1	4337	0	PREDICTED: zinc finger E-box-binding homeobox 2 isoform X1 [Bemisia tabaci]	XM_019062227.1	XM_019062227	5115	0	PREDICTED: Bemisia tabaci zinc finger E-box-binding homeobox protein zag-1 (LOC109044486), transcript variant X1, mRNA	--	--	--	--	Q7TSH9	258	1.8e-20	Zinc finger protein 184 OS=Mus musculus GN=Zfp184 PE=2 SV=1	PF01213//PF00096//PF16622//PF00046//PF05920//PF13465	Adenylate cyclase associated (CAP) N terminal//Zinc finger, C2H2 type//zinc-finger C2H2-type//Homeobox domain//Homeobox KN domain//Zinc-finger double domain	GO:0006355//GO:0007010	regulation of transcription, DNA-templated//cytoskeleton organization	GO:0003677//GO:0046872//GO:0003779	DNA binding//metal ion binding//actin binding	--	--	--	--	FALSE	-0.19914	0.9261	FALSE	0.89433	0.0034619	UP	1.7668	0.00045747	FALSE	-0.34429	0.43208	FALSE	0.19558	0.89432
Cluster-35353.50712	zf-C2H2	Cluster-35353.50712	UP	1.202	0.028552	2119	9729170	XP_018900357.1	2032	3.6e-225	PREDICTED: uncharacterized protein LOC109032596 [Bemisia tabaci]	XM_019044812.1	XM_019044812	1884	0	PREDICTED: Bemisia tabaci uncharacterized LOC109032596 (LOC109032596), mRNA	--	--	--	--	Q5R4K8	385	1.3e-35	Zinc finger protein 615 OS=Pongo abelii GN=ZNF615 PE=2 SV=2	PF00096//PF13465	Zinc finger, C2H2 type//Zinc-finger double domain	--	--	GO:0046872	metal ion binding	--	--	--	--	FALSE	0.23328	0.92133	UP	1.1148	0.00017933	UP	1.202	0.028552	FALSE	-0.023267	0.98416	FALSE	0.30637	0.78684
Cluster-35353.57455	zf-C2H2	Cluster-35353.57455	UP	2.0113	0.011424	1338	9732599	XP_018904168.1	723	1.4e-73	PREDICTED: oocyte zinc finger protein XlCOF22-like isoform X1 [Bemisia tabaci]	--	--	--	--	--	K09228	KRAB	KRAB domain-containing zinc finger protein	http://www.genome.jp/dbget-bin/www_bget?ko:K09228	P18745	367	9.9e-34	Oocyte zinc finger protein XlCOF22 OS=Xenopus laevis PE=3 SV=1	PF01155//PF01428//PF06467//PF04777//PF13912//PF13465//PF00096	Hydrogenase/urease nickel incorporation, metallochaperone, hypA//AN1-like Zinc finger//MYM-type Zinc finger with FCS sequence motif//Erv1 / Alr family//C2H2-type zinc finger//Zinc-finger double domain//Zinc finger, C2H2 type	GO:0055114//GO:0006464	oxidation-reduction process//cellular protein modification process	GO:0008270//GO:0016972//GO:0046872//GO:0016151	zinc ion binding//thiol oxidase activity//metal ion binding//nickel cation binding	--	--	--	--	FALSE	0.85736	0.33124	UP	2.7603	4.47e-10	UP	2.0113	0.011424	FALSE	0.41328	0.7945	FALSE	0.48981	0.74029
Cluster-35353.65615	zf-C2H2	Cluster-35353.65615	DOWN	-1.0656	0.005046	4441	9735274	XP_018913117.1	3207	0	PREDICTED: zinc finger protein PLAG1-like [Bemisia tabaci]	XM_019057572.1	XM_019057572	4223	0	PREDICTED: Bemisia tabaci zinc finger protein PLAG1-like (LOC109041281), mRNA	K19484	PLAG1	zinc finger protein PLAG1	http://www.genome.jp/dbget-bin/www_bget?ko:K19484	P51523	357	4.8e-32	Zinc finger protein 84 OS=Homo sapiens GN=ZNF84 PE=1 SV=2	PF13465//PF00096	Zinc-finger double domain//Zinc finger, C2H2 type	--	--	GO:0046872	metal ion binding	--	--	--	--	FALSE	0.016587	0.97952	FALSE	-0.71341	0.014733	DOWN	-1.0656	0.005046	FALSE	0.061203	0.96628	FALSE	0.005847	0.99189
Cluster-35353.32563	zf-C2H2	Cluster-35353.32563	DOWN	-1.2305	0.027674	2088	6363430	KOF86359.1	161	3.2e-08	hypothetical protein OCBIM_22018767mg [Octopus bimaculoides]	XM_019048338.1	XM_019048338	51	5.5e-15	PREDICTED: Bemisia tabaci protein bric-a-brac 2-like (LOC109034918), mRNA	K09228	KRAB	KRAB domain-containing zinc finger protein	http://www.genome.jp/dbget-bin/www_bget?ko:K09228	P51508	149	2.9e-08	Zinc finger protein 81 OS=Homo sapiens GN=ZNF81 PE=1 SV=3	--	--	--	--	--	--	--	--	--	--	FALSE	0.35262	0.88554	FALSE	-0.82234	0.014717	DOWN	-1.2305	0.027674	FALSE	-0.30711	0.78128	FALSE	0.70421	0.39186
Cluster-35353.46932	zf-C2H2	Cluster-35353.46932	UP	2.5516	0.00024545	2780	9766796	XP_018912439.1	1425	1.2e-154	PREDICTED: transcription factor Ken [Bemisia tabaci]	XM_019056895.1	XM_019056895	2525	0	PREDICTED: Bemisia tabaci transcription factor Ken (LOC109040815), transcript variant X3, mRNA	--	--	--	--	B0X9H6	624	3.3e-63	Transcription factor Ken 1 OS=Culex quinquefasciatus GN=ken1 PE=3 SV=1	PF13465//PF13912//PF00096	Zinc-finger double domain//C2H2-type zinc finger//Zinc finger, C2H2 type	--	--	GO:0046872	metal ion binding	--	--	--	--	FALSE	-0.421	0.89538	UP	1.9727	3.85e-08	UP	2.5516	0.00024545	FALSE	-0.40912	0.41134	FALSE	0.033875	0.97452
Cluster-35353.25082	zf-C2H2	Cluster-35353.25082	UP	4.1843	6.89e-10	664	9725066	XP_018895785.1	345	4.7e-30	PREDICTED: zinc finger protein 425-like [Bemisia tabaci]	XR_002008643.1	XR_002008643	403	0	PREDICTED: Bemisia tabaci uncharacterized LOC109029708 (LOC109029708), transcript variant X4, misc_RNA	--	--	--	--	Q9N003	227	8.4e-18	Zinc finger protein 425 (Fragment) OS=Macaca fascicularis GN=ZNF425 PE=2 SV=2	PF02150//PF00412//PF13465//PF02146//PF00096//PF00628	RNA polymerases M/15 Kd subunit//LIM domain//Zinc-finger double domain//Sir2 family//Zinc finger, C2H2 type//PHD-finger	GO:0006206//GO:0006351//GO:0006144	pyrimidine nucleobase metabolic process//transcription, DNA-templated//purine nucleobase metabolic process	GO:0005515//GO:0070403//GO:0008270//GO:0003677//GO:0046872//GO:0003899	protein binding//NAD+ binding//zinc ion binding//DNA binding//metal ion binding//DNA-directed RNA polymerase activity	GO:0005730	nucleolus	--	--	FALSE	0.26255	0.9173	UP	2.3721	6.15e-08	UP	4.1843	6.89e-10	FALSE	0.34274	0.72796	FALSE	-0.029341	0.97051
Cluster-35353.53187	zf-C2H2	Cluster-35353.53187	DOWN	-1.0647	0.017313	5161	10997731	XP_013792823.2	607	1.5e-59	zinc finger protein 62 homolog, partial [Limulus polyphemus]	XM_019058955.1	XM_019058955	4528	0	PREDICTED: Bemisia tabaci oocyte zinc finger protein XlCOF6-like (LOC109042294), mRNA	K09228	KRAB	KRAB domain-containing zinc finger protein	http://www.genome.jp/dbget-bin/www_bget?ko:K09228	P51523	596	1.1e-59	Zinc finger protein 84 OS=Homo sapiens GN=ZNF84 PE=1 SV=2	PF07776//PF13465//PF13912//PF00096	Zinc-finger associated domain (zf-AD)//Zinc-finger double domain//C2H2-type zinc finger//Zinc finger, C2H2 type	--	--	GO:0008270//GO:0046872	zinc ion binding//metal ion binding	GO:0005634	nucleus	--	--	FALSE	-0.2848	0.87224	FALSE	-0.42674	0.28633	DOWN	-1.0647	0.017313	FALSE	-0.057267	0.96628	FALSE	-0.18109	0.90961
Cluster-35353.40910	zf-C2H2	Cluster-35353.40910	UP	3.0289	1.66e-07	4321	11119300	XP_022303386.1	400	1.3e-35	putative zinc finger protein 66 [Crassostrea virginica]	XM_019043127.1	XM_019043127	1481	0	PREDICTED: Bemisia tabaci zinc finger protein rotund-like (LOC109031550), transcript variant X3, mRNA	--	--	--	--	Q0VAW7	400	4.8e-37	Zinc finger protein 112 OS=Mus musculus GN=Znf112 PE=2 SV=2	PF16622//PF13465//PF13912//PF00096//PF11654	zinc-finger C2H2-type//Zinc-finger double domain//C2H2-type zinc finger//Zinc finger, C2H2 type//Protein of unknown function (DUF2665)	GO:0009306	protein secretion	GO:0046872	metal ion binding	--	--	--	--	FALSE	-0.50601	0.65198	UP	3.4538	2.9e-09	UP	3.0289	1.66e-07	FALSE	-0.37125	0.84991	FALSE	-0.08397	0.96893
Cluster-35353.49310	zf-C2H2	Cluster-35353.49310	UP	2.1256	0.0013202	4552	9732879	XP_018904482.1	2924	0	PREDICTED: B-cell lymphoma..leukemia 11A [Bemisia tabaci]	XM_019048937.1	XM_019048937	2417	0	PREDICTED: Bemisia tabaci B-cell lymphoma/leukemia 11A (LOC109035344), mRNA	--	--	--	--	Q9NSJ1	218	6.4e-16	Putative zinc finger protein 355P OS=Homo sapiens GN=ZNF355P PE=5 SV=2	--	--	--	--	--	--	--	--	--	--	FALSE	-0.15811	0.93526	UP	3.1102	7.95e-09	UP	2.1256	0.0013202	FALSE	0.15921	0.96628	FALSE	-0.26991	0.8978
Cluster-35353.31370	zf-C2H2	Cluster-35353.31370	DOWN	-1.3055	0.019996	3927	9735409	XP_018913268.1	2579	2.5e-288	PREDICTED: gastrula zinc finger protein XlCGF26.1-like isoform X2 [Bemisia tabaci]	XM_019057722.1	XM_019057722	1752	0	PREDICTED: Bemisia tabaci gastrula zinc finger protein XlCGF26.1-like (LOC109041378), transcript variant X1, mRNA	K09228	KRAB	KRAB domain-containing zinc finger protein	http://www.genome.jp/dbget-bin/www_bget?ko:K09228	P18749	810	1.2e-84	Oocyte zinc finger protein XlCOF6 (Fragment) OS=Xenopus laevis PE=3 SV=1	PF13465//PF13912//PF01405//PF01853//PF00096	Zinc-finger double domain//C2H2-type zinc finger//Photosystem II reaction centre T protein//MOZ/SAS family//Zinc finger, C2H2 type	GO:0015979//GO:0006355	photosynthesis//regulation of transcription, DNA-templated	GO:0016747//GO:0046872	transferase activity, transferring acyl groups other than amino-acyl groups//metal ion binding	GO:0009539//GO:0009523//GO:0016020	photosystem II reaction center//photosystem II//membrane	--	--	FALSE	0.1263	0.9382	FALSE	-0.9283	0.015114	DOWN	-1.3055	0.019996	FALSE	0.11766	0.96628	FALSE	0.056465	0.96893
Cluster-35353.49207	zf-C2H2	Cluster-35353.49207	UP	6.0758	4.47e-05	2409	4503372	XP_008470307.1	1207	1.9e-129	PREDICTED: uncharacterized protein LOC103507594 [Diaphorina citri]	XM_019051642.1	XM_019051642	2055	0	PREDICTED: Bemisia tabaci early growth response protein 1-B (LOC109037132), mRNA	K12497	EGR3	early growth response protein 3	http://www.genome.jp/dbget-bin/www_bget?ko:K12497	A6NK53	249	8.6e-20	Zinc finger protein 233 OS=Homo sapiens GN=ZNF233 PE=2 SV=3	PF13465//PF11593//PF02207//PF02892//PF00096	Zinc-finger double domain//Mediator complex subunit 3 fungal//Putative zinc finger in N-recognin (UBR box)//BED zinc finger//Zinc finger, C2H2 type	GO:0006357	regulation of transcription from RNA polymerase II promoter	GO:0046872//GO:0001104//GO:0003677//GO:0008270	metal ion binding//RNA polymerase II transcription cofactor activity//DNA binding//zinc ion binding	GO:0016592	mediator complex	--	--	FALSE	-0.13707	0.95205	UP	7.4589	1.43e-07	UP	6.0758	4.47e-05	FALSE	0.42427	0.96628	FALSE	-0.50826	0.86344
Cluster-35353.60224	zf-C2H2	Cluster-35353.60224	DOWN	-1.2963	0.0034404	3799	9738313	XP_018915259.1	828	2.7e-85	PREDICTED: uncharacterized protein LOC109042788 [Bemisia tabaci]	XR_002008835.1	XR_002008835	1371	0	PREDICTED: Bemisia tabaci uncharacterized LOC109031757 (LOC109031757), transcript variant X4, misc_RNA	--	--	--	--	--	--	--	--	PF04650//PF00096	YSIRK type signal peptide//Zinc finger, C2H2 type	--	--	GO:0046872	metal ion binding	GO:0016020	membrane	--	--	FALSE	-1.12	0.086525	FALSE	-0.8505	0.059699	DOWN	-1.2963	0.0034404	FALSE	0.51597	0.73555	DOWN	-1.5851	0.00042617
Cluster-35353.19305	zf-C2H2	Cluster-35353.19305	UP	5.5189	0.012387	916	9765706	XP_018911226.1	242	5.8e-18	PREDICTED: uncharacterized protein LOC109039948 [Bemisia tabaci]	XM_019062552.1	XM_019062552	540	0	PREDICTED: Bemisia tabaci zinc finger protein SNAI2-like (LOC109044716), mRNA	K05706	SNAI2, SLUG	snail 2	http://www.genome.jp/dbget-bin/www_bget?ko:K05706	Q13360	246	7.3e-20	Zinc finger protein 177 OS=Homo sapiens GN=ZNF177 PE=1 SV=4	--	--	--	--	--	--	--	--	--	--	FALSE	0.52088	0.9261	UP	6.686	2.47e-05	UP	5.5189	0.012387	FALSE	0.11927	0.96628	FALSE	0.44212	0.91034
Cluster-35353.16840	zf-C2H2	Cluster-35353.16840	UP	3.3243	0.015873	1319	9725066	XP_018895785.1	1969	4.6e-218	PREDICTED: zinc finger protein 425-like [Bemisia tabaci]	XM_019040240.1	XM_019040240	1041	0	PREDICTED: Bemisia tabaci zinc finger protein 425-like (LOC109029667), mRNA	--	--	--	--	Q8N393	359	8.3e-33	Zinc finger protein 786 OS=Homo sapiens GN=ZNF786 PE=2 SV=2	PF16622//PF13465//PF00096//PF01155	zinc-finger C2H2-type//Zinc-finger double domain//Zinc finger, C2H2 type//Hydrogenase/urease nickel incorporation, metallochaperone, hypA	GO:0006464	cellular protein modification process	GO:0046872//GO:0016151	metal ion binding//nickel cation binding	--	--	--	--	FALSE	0.59167	0.86019	UP	4.0053	5.01e-06	UP	3.3243	0.015873	FALSE	-0.24397	0.96628	FALSE	0.88784	0.58328
Cluster-35353.25524	zf-C2H2	Cluster-35353.25524	DOWN	-1.3246	0.016581	913	9751881	XP_018908761.1	806	2.3e-83	PREDICTED: zinc finger protein 236-like [Bemisia tabaci]	XM_019053216.1	XM_019053216	910	0	PREDICTED: Bemisia tabaci zinc finger protein 236-like (LOC109038230), mRNA	K09228	KRAB	KRAB domain-containing zinc finger protein	http://www.genome.jp/dbget-bin/www_bget?ko:K09228	P51523	481	4.1e-47	Zinc finger protein 84 OS=Homo sapiens GN=ZNF84 PE=1 SV=2	PF06007//PF04847//PF13912//PF00130//PF13465//PF00096//PF02207//PF06467	Phosphonate metabolism protein PhnJ//Calcipressin//C2H2-type zinc finger//Phorbol esters/diacylglycerol binding domain (C1 domain)//Zinc-finger double domain//Zinc finger, C2H2 type//Putative zinc finger in N-recognin (UBR box)//MYM-type Zinc finger with FCS sequence motif	GO:0035556//GO:0019700//GO:0042916//GO:0019722	intracellular signal transduction//organic phosphonate catabolic process//alkylphosphonate transport//calcium-mediated signaling	GO:0046872//GO:0016829//GO:0008270	metal ion binding//lyase activity//zinc ion binding	--	--	--	--	DOWN	-2.5061	1.88e-05	FALSE	0.9895	0.3577	DOWN	-1.3246	0.016581	FALSE	0.060941	0.98073	DOWN	-2.5148	9.75e-06
Cluster-35353.42947	zf-C2H2	Cluster-35353.42947	UP	2.5601	0.027013	1864	9738910	XP_018915928.1	2174	1.1e-241	PREDICTED: transcription factor Sp9 isoform X1 [Bemisia tabaci]	XM_019060383.1	XM_019060383	1642	0	PREDICTED: Bemisia tabaci transcription factor Sp9 (LOC109043241), transcript variant X1, mRNA	K09199	SP9	transcription factor Sp9	http://www.genome.jp/dbget-bin/www_bget?ko:K09199	Q8VI67	637	6.8e-65	Transcription factor Sp7 OS=Mus musculus GN=Sp7 PE=1 SV=1	PF00096//PF13912//PF13465	Zinc finger, C2H2 type//C2H2-type zinc finger//Zinc-finger double domain	--	--	GO:0046872	metal ion binding	--	--	--	--	FALSE	-0.43401	0.90409	UP	3.3467	0.0034987	UP	2.5601	0.027013	FALSE	0.4603	0.96628	FALSE	-0.84462	0.57291
Cluster-35353.54249	zf-C2H2	Cluster-35353.54249	DOWN	-1.7158	0.026067	1449	9730786	XP_018902150.1	1233	1.1e-132	PREDICTED: uncharacterized protein LOC109033817 isoform X4 [Bemisia tabaci]	XM_019046605.1	XM_019046605	685	0	PREDICTED: Bemisia tabaci uncharacterized LOC109033817 (LOC109033817), transcript variant X5, mRNA	--	--	--	--	Q8BV42	317	6.7e-28	Zinc finger protein 786 OS=Mus musculus GN=Znf786 PE=2 SV=1	PF00096//PF13465	Zinc finger, C2H2 type//Zinc-finger double domain	--	--	GO:0046872	metal ion binding	--	--	--	--	FALSE	-0.43257	0.92929	DOWN	-1.8347	0.00080423	DOWN	-1.7158	0.026067	FALSE	0.40409	0.96628	FALSE	-0.7869	0.77965
Cluster-35353.15154	zf-C2H2	Cluster-35353.15154	DOWN	-1.6893	0.030297	1870	9751881	XP_018908761.1	1268	1.3e-136	PREDICTED: zinc finger protein 236-like [Bemisia tabaci]	XM_019041328.1	XM_019041328	1752	0	PREDICTED: Bemisia tabaci zinc finger protein 345-like (LOC109030389), transcript variant X1, mRNA	K09228	KRAB	KRAB domain-containing zinc finger protein	http://www.genome.jp/dbget-bin/www_bget?ko:K09228	P10076	1057	1.4e-113	Zinc finger protein 26 OS=Mus musculus GN=Zfp26 PE=2 SV=2	PF00096//PF13465//PF13912//PF10403//PF16622//PF02150	Zinc finger, C2H2 type//Zinc-finger double domain//C2H2-type zinc finger//Rad4 beta-hairpin domain 1//zinc-finger C2H2-type//RNA polymerases M/15 Kd subunit	GO:0006144//GO:0006206//GO:0006351	purine nucleobase metabolic process//pyrimidine nucleobase metabolic process//transcription, DNA-templated	GO:0046872//GO:0003677//GO:0003899	metal ion binding//DNA binding//DNA-directed RNA polymerase activity	GO:0005730	nucleolus	--	--	FALSE	0.24934	0.93526	DOWN	-1.5364	0.0022454	DOWN	-1.6893	0.030297	FALSE	-0.044947	0.99002	FALSE	0.34042	0.91312
Cluster-35353.15607	zf-C2H2	Cluster-35353.15607	UP	4.7856	0.010429	522	9724703	XP_018918097.1	757	6.3e-78	PREDICTED: zinc finger protein SNAI2-like [Bemisia tabaci]	XM_019062552.1	XM_019062552	501	0	PREDICTED: Bemisia tabaci zinc finger protein SNAI2-like (LOC109044716), mRNA	--	--	--	--	--	--	--	--	PF13465//PF03453//PF00096//PF02892//PF13912	Zinc-finger double domain//MoeA N-terminal region (domain I and II)//Zinc finger, C2H2 type//BED zinc finger//C2H2-type zinc finger	GO:0032324	molybdopterin cofactor biosynthetic process	GO:0046872//GO:0003677	metal ion binding//DNA binding	--	--	--	--	FALSE	-0.63836	0.86504	UP	4.7318	0.011209	UP	4.7856	0.010429	FALSE	-0.029242	0.99002	FALSE	-0.56241	0.86783
Cluster-33625.0	zf-C2H2	Cluster-33625.0	DOWN	-1.2248	0.031361	1732	9725724	XP_018896516.1	1905	1.6e-210	PREDICTED: zinc finger protein 808-like [Bemisia tabaci]	XM_019040971.1	XM_019040971	1233	0	PREDICTED: Bemisia tabaci zinc finger protein 808-like (LOC109030145), transcript variant X3, mRNA	--	--	--	--	Q4V348	392	1.6e-36	Zinc finger protein 658B OS=Homo sapiens GN=ZNF658B PE=2 SV=1	PF00130//PF13465//PF13912//PF00096//PF04799//PF16622	Phorbol esters/diacylglycerol binding domain (C1 domain)//Zinc-finger double domain//C2H2-type zinc finger//Zinc finger, C2H2 type//fzo-like conserved region//zinc-finger C2H2-type	GO:0008053//GO:0035556	mitochondrial fusion//intracellular signal transduction	GO:0003924//GO:0046872	GTPase activity//metal ion binding	GO:0005741//GO:0016021	mitochondrial outer membrane//integral component of membrane	--	--	DOWN	-2.7452	6.92e-06	FALSE	-0.95926	0.26987	DOWN	-1.2248	0.031361	FALSE	0.91273	0.64537	DOWN	-3.605	2.18e-09
Cluster-35353.22088	zf-C2H2	Cluster-35353.22088	UP	5.6722	0.035025	1274	4175412	XP_006818348.1	493	6.3e-47	PREDICTED: myoneurin-like isoform X2 [Saccoglossus kowalevskii]	XM_019052647.1	XM_019052647	1150	0	PREDICTED: Bemisia tabaci fez family zinc finger protein 1-like (LOC109037823), mRNA	--	--	--	--	Q9H8G1	484	2.6e-47	Zinc finger protein 430 OS=Homo sapiens GN=ZNF430 PE=1 SV=3	PF00096//PF05191//PF04810//PF13465//PF01428//PF13912//PF16622//PF01363//PF07649	Zinc finger, C2H2 type//Adenylate kinase, active site lid//Sec23/Sec24 zinc finger//Zinc-finger double domain//AN1-like Zinc finger//C2H2-type zinc finger//zinc-finger C2H2-type//FYVE zinc finger//C1-like domain	GO:0046034//GO:0006888//GO:0006886//GO:0055114//GO:0006144	ATP metabolic process//ER to Golgi vesicle-mediated transport//intracellular protein transport//oxidation-reduction process//purine nucleobase metabolic process	GO:0008270//GO:0046872//GO:0004017//GO:0047134	zinc ion binding//metal ion binding//adenylate kinase activity//protein-disulfide reductase activity	GO:0030127	COPII vesicle coat	--	--	FALSE	-1.0811	0.82504	FALSE	4.2708	0.14158	UP	5.6722	0.035025	FALSE	0.62688	0.96628	FALSE	-1.6584	0.52703
Cluster-35353.59256	zf-C2H2	Cluster-35353.59256	DOWN	-1.2161	0.027294	1260	9738298	XP_018915242.1	768	8e-79	PREDICTED: gastrula zinc finger protein XlCGF17.1-like [Bemisia tabaci]	XM_019057845.1	XM_019057845	982	0	PREDICTED: Bemisia tabaci gastrula zinc finger protein XlCGF57.1-like (LOC109041479), mRNA	K09228	KRAB	KRAB domain-containing zinc finger protein	http://www.genome.jp/dbget-bin/www_bget?ko:K09228	P18729	550	5.6e-55	Gastrula zinc finger protein XlCGF57.1 (Fragment) OS=Xenopus laevis PE=3 SV=1	PF15014//PF04831//PF00096//PF04858//PF06007//PF13465//PF16622	Ceroid-lipofuscinosis neuronal protein 5//Popeye protein conserved region//Zinc finger, C2H2 type//TH1 protein//Phosphonate metabolism protein PhnJ//Zinc-finger double domain//zinc-finger C2H2-type	GO:0022008//GO:0045892//GO:0042916//GO:0019700	neurogenesis//negative regulation of transcription, DNA-templated//alkylphosphonate transport//organic phosphonate catabolic process	GO:0046872//GO:0016829	metal ion binding//lyase activity	GO:0005634//GO:0005764//GO:0016020	nucleus//lysosome//membrane	--	--	DOWN	-5.4606	1.73e-14	FALSE	1.0199	0.85136	DOWN	-1.2161	0.027294	FALSE	-0.056206	0.99002	DOWN	-5.3327	1.97e-18
Cluster-22441.1	zf-C2H2	Cluster-22441.1	UP	3.2794	0.04365	1721	9722163	XP_018901446.1	1578	1.3e-172	PREDICTED: gastrula zinc finger protein XlCGF57.1-like [Bemisia tabaci]	XM_019045901.1	XM_019045901	743	0	PREDICTED: Bemisia tabaci gastrula zinc finger protein XlCGF57.1-like (LOC109033318), transcript variant X2, mRNA	--	--	--	--	Q6P1L6	434	2.2e-41	Zinc finger protein 343 OS=Homo sapiens GN=ZNF343 PE=1 SV=1	PF00096//PF01155//PF13465//PF16622	Zinc finger, C2H2 type//Hydrogenase/urease nickel incorporation, metallochaperone, hypA//Zinc-finger double domain//zinc-finger C2H2-type	GO:0006464	cellular protein modification process	GO:0046872//GO:0016151	metal ion binding//nickel cation binding	--	--	--	--	DOWN	-3.7312	0.01274	FALSE	2.7168	0.77244	UP	3.2794	0.04365	DOWN	-3.9286	0.0007735	FALSE	0.23047	0.92603
Cluster-35353.66430	zf-C2H2	Cluster-35353.66430	UP	2.2485	0.0075722	2562	9738567	XP_018915548.1	2126	5.6e-236	PREDICTED: zinc finger protein 358-like [Bemisia tabaci]	XM_019060003.1	XM_019060003	1826	0	PREDICTED: Bemisia tabaci zinc finger protein 358-like (LOC109042992), mRNA	--	--	--	--	P18751	221	1.6e-16	Oocyte zinc finger protein XlCOF7.1 (Fragment) OS=Xenopus laevis PE=2 SV=1	PF00096//PF05191//PF01363//PF16622//PF13912//PF13465//PF00518	Zinc finger, C2H2 type//Adenylate kinase, active site lid//FYVE zinc finger//zinc-finger C2H2-type//C2H2-type zinc finger//Zinc-finger double domain//Early Protein (E6)	GO:0006144//GO:0046034	purine nucleobase metabolic process//ATP metabolic process	GO:0004017//GO:0003677//GO:0046872	adenylate kinase activity//DNA binding//metal ion binding	GO:0042025	host cell nucleus	--	--	DOWN	-3.5649	1.04e-06	FALSE	4.6124	0.064417	UP	2.2485	0.0075722	FALSE	0.54341	0.96628	DOWN	-4.0669	5.06e-07
Cluster-35353.35064	zf-C2H2	Cluster-35353.35064	UP	3.1378	3.21e-17	3158	9729657	XP_018900894.1	2625	9.4e-294	PREDICTED: box A-binding factor-like isoform X5 [Bemisia tabaci]	XM_019045349.1	XM_019045349	2325	0	PREDICTED: Bemisia tabaci box A-binding factor-like (LOC109032980), transcript variant X5, mRNA	K09182	GATA1	GATA-binding protein 1	http://www.genome.jp/dbget-bin/www_bget?ko:K09182	P52172	276	8.4e-23	Box A-binding factor OS=Drosophila melanogaster GN=srp PE=1 SV=2	--	--	--	--	--	--	--	--	KOG1601	GATA-4/5/6 transcription factors	FALSE	0.27788	0.84267	UP	3.6737	1.38e-08	UP	3.1378	3.21e-17	FALSE	-0.032478	0.96909	FALSE	0.36044	0.61303
Cluster-35353.43607	zf-C2H2	Cluster-35353.43607	UP	2.0819	0.038414	966	9729652	XP_018900888.1	1435	2.8e-156	PREDICTED: GATA zinc finger domain-containing protein 14-like [Bemisia tabaci]	XM_019045343.1	XM_019045343	924	0	PREDICTED: Bemisia tabaci GATA zinc finger domain-containing protein 14-like (LOC109032979), mRNA	K17895	GATA3	GATA-binding protein 3	http://www.genome.jp/dbget-bin/www_bget?ko:K17895	P52168	419	6.7e-40	GATA-binding factor A OS=Drosophila melanogaster GN=pnr PE=1 SV=1	PF01873//PF00320//PF08273	Domain found in IF2B/IF5//GATA zinc finger//Zinc-binding domain of primase-helicase	GO:0006269//GO:0006446//GO:0006413//GO:0006355//GO:0006351	DNA replication, synthesis of RNA primer//regulation of translational initiation//translational initiation//regulation of transcription, DNA-templated//transcription, DNA-templated	GO:0003700//GO:0003743//GO:0004386//GO:0008270//GO:0003896//GO:0043565	transcription factor activity, sequence-specific DNA binding//translation initiation factor activity//helicase activity//zinc ion binding//DNA primase activity//sequence-specific DNA binding	GO:0005657//GO:0005730//GO:0005840//GO:0005667	replication fork//nucleolus//ribosome//transcription factor complex	KOG1601	GATA-4/5/6 transcription factors	FALSE	-0.3808	0.93526	UP	1.7422	0.0034697	UP	2.0819	0.038414	FALSE	-0.21316	0.96628	FALSE	-0.11481	0.96893
Cluster-35353.15217	zf-GATA	Cluster-35353.15217	UP	1.2905	0.014703	8397	9722606	XP_018906289.1	2312	4.9e-257	PREDICTED: zinc finger MIZ domain-containing protein 1 isoform X2 [Bemisia tabaci]	XM_019050744.1	XM_019050744	6220	0	PREDICTED: Bemisia tabaci zinc finger MIZ domain-containing protein 1 (LOC109036486), transcript variant X2, mRNA	--	--	--	--	Q6P1E1	1269	1.6e-137	Zinc finger MIZ domain-containing protein 1 OS=Mus musculus GN=Zmiz1 PE=2 SV=1	PF08107//PF02891//PF11789	Pleurocidin family//MIZ/SP-RING zinc finger//Zinc-finger of the MIZ type in Nse subunit	GO:0042742	defense response to bacterium	GO:0008270	zinc ion binding	--	--	KOG2169	Zn-finger transcription factor	FALSE	0.031863	0.97261	UP	1.2278	7.12e-12	UP	1.2905	0.014703	FALSE	0.13906	0.95803	FALSE	-0.060259	0.96893
[truncated: 4 more columns]
